# Supplementary material for: Bacillus thuringiensis and Chlorantraniliprole Trigger the Expression of Detoxification-Related Genes in the Larval Midgut of Plutella xylostella
Source: Front Physiol. 2021 Dec 13;12:780255. doi: 10.3389/fphys.2021.780255 (PMC8710669; doi:10.3389/fphys.2021.780255)
Supplement: Supplementary file 3 [file Table_3.xlsx]

## Sheet: Bt vs FOH
	Table S3 The differentially expressed genes between Bt-resistant (Bt-DBM) and field high resistant strains (FOH-DBM) of Plutelle xylostella
					Bt-DBM vs FOH-DBM
			Up-regulated
Gene	Bt-DBM_1	Bt-DBM_2	Bt-DBM_3	FOH-DBM_1	FOH-DBM_2	FOH-DBM_3	logFC	FDR	KEGG	NR
LOC105395717	5.38	13.03	27.8	1.48	0.78	1.5	3.20223	0.000910621	NA	PREDICTED: probable cytochrome P450 6a13 [Plutella xylostella]
LOC105382179	4.29	4.73	1.08	0.13	0.09	0.21	4.25849	0.00294621	NA	PREDICTED: cytochrome P450 6B1-like [Plutella xylostella]
LOC105397997	0.13	14.64	6.9	0.53	0.06	0.16	4.47002	0.00890408	NA	PREDICTED: cytochrome P450 4g15 [Plutella xylostella]
LOC105381308	0.09	0.71	0.6	0	0	0	6.12421	0.0351061	TBXAS1, CYP5A; thromboxane-A synthase [EC:5.3.99.5]; K01832	PREDICTED: cytochrome P450 6B5-like [Plutella xylostella]
LOC105398756	10.77	17.33	12.3	4.16	0.9	1.79	2.28811	0.0219095	ACHE; acetylcholinesterase [EC:3.1.1.7]; K01049	PREDICTED: venom carboxylesterase-6-like isoform X1 [Plutella xylostella]
LOC105381636	0.99	6.66	18.72	0.2	0.14	0.14	5.24493	0.00088715	NA	PREDICTED: serine protease 2-like, partial [Plutella xylostella]
LOC105387636	0.56	8.5	6.18	0.09	0.18	0.26	4.37375	0.00220635	NA	PREDICTED: serine proteinase stubble-like [Plutella xylostella]
LOC105387637	0.22	5.52	3.1	0.14	0	0.07	4.96484	0.00278831	NA	PREDICTED: serine proteinase stubble-like [Plutella xylostella]
LOC105388358	12.43	7.25	8.93	1.68	1.25	2.13	2.22511	0.0219248	NA	PREDICTED: probable serine/threonine-protein kinase DDB_G0282963 [Plutella xylostella]
LOC105398705	4.41	6.84	9.21	1.42	0.94	0.88	2.25423	0.0395406	NA	PREDICTED: serine/threonine-protein phosphatase 4 regulatory subunit 2-like [Plutella xylostella]
LOC105398499	11.34	8.32	9.86	2.63	1.26	1.75	2.09351	0.0422018	RIOK1; RIO kinase 1 [EC:2.7.11.1]; K07178	PREDICTED: serine/threonine-protein kinase RIO1 [Plutella xylostella]
LOC105387663	9.03	14.46	18.86	2.79	1.69	3.38	2.07302	0.0422018	SARS, serS; seryl-tRNA synthetase [EC:6.1.1.11]; K01875	PREDICTED: serine--tRNA ligase, mitochondrial [Plutella xylostella]
LOC105386383	1.46	0.57	5.56	0.04	0.08	0.14	4.36884	0.00141671	NA	PREDICTED: glutamate-gated chloride channel-like isoform X5 [Plutella xylostella]
LOC105384451	84.87	29.71	35.43	4.67	1.67	13.73	2.81385	0.014446	NDUFA7; NADH dehydrogenase (ubiquinone) 1 alpha subcomplex subunit 7; K03951	PREDICTED: NADH dehydrogenase [ubiquinone] 1 alpha subcomplex subunit 7-like [Plutella xylostella]
LOC105388830	8.07	2.86	2.14	0.52	0.14	0.07	3.93761	0.0174112	NOX4, RENOX; NADPH oxidase 4 [EC:1.6.3.-]; K21423	PREDICTED: NADPH oxidase 1-like [Plutella xylostella]
LOC105383909	24.13	291.15	318.48	1.42	3.67	5.98	5.33729	4.23231e-05	E3.2.1.14; chitinase [EC:3.2.1.14]; K01183	PREDICTED: probable chitinase 2 [Plutella xylostella]
LOC105380296	5.36	11.12	11.23	0.84	0.88	1.21	2.82764	0.00160581	CHS1; chitin synthase [EC:2.4.1.16]; K00698	PREDICTED: uncharacterized protein LOC105380296 isoform X2 [Plutella xylostella]
LOC105384397	2.17	9.06	8.08	0	0	0.07	7.01983	2.13351e-05	NA	PREDICTED: trypsin-1-like [Plutella xylostella]
LOC105391571	10.31	17.52	18.66	0	0.43	1.19	4.44324	0.000337311	PRSS1_2_3; trypsin [EC:3.4.21.4]; K01312	PREDICTED: trypsin CFT-1-like [Plutella xylostella]
LOC105386029	2.27	15.99	9.65	0.5	0	0.07	5.20318	0.000417233	NA	PREDICTED: trypsin-1-like [Plutella xylostella]
LOC105382172	1.43	61.92	12.56	0.51	0.35	0.59	5.28425	0.000617626	PRSS1_2_3; trypsin [EC:3.4.21.4]; K01312	PREDICTED: trypsin CFT-1-like [Plutella xylostella]
LOC105384400	2.51	13.15	16.81	0.72	0	0	5.07424	0.00128705	NA	PREDICTED: trypsin-1-like [Plutella xylostella]
LOC105394168	87.6	52.82	143.73	0	1.19	0.19	7.04151	2.41492e-14	NA	PREDICTED: trypsin II-P29-like [Plutella xylostella]
LOC105384397	25.35	12	10.64	0.14	0.19	0	6.3297	1.98952e-12	NA	PREDICTED: trypsin-1-like [Plutella xylostella]
LOC105386029	25.79	17.21	29.8	0	0.63	0.33	5.53117	1.59298e-11	NA	PREDICTED: trypsin-1-like [Plutella xylostella]
LOC105392860	12.8	9.23	28.78	0.16	0.38	0	5.8537	1.28173e-09	PRSS1_2_3; trypsin [EC:3.4.21.4]; K01312	PREDICTED: trypsin CFT-1-like [Plutella xylostella]
LOC105384400	14.11	9.58	8.41	0	0.32	0.21	5.13095	1.5313e-09	NA	PREDICTED: trypsin-1-like [Plutella xylostella]
LOC105388353	27.08	14.43	3.98	0	0.19	0	6.87142	2.58706e-09	PRSS1_2_3; trypsin [EC:3.4.21.4]; K01312	PREDICTED: trypsin [EC:3.4.21.4]; LOC105388353 [Plutella xylostella]
LOC105383118	51.57	133.06	55.2	1.4	5.89	1.03	4.24716	3.04066e-08	PRSS1_2_3; trypsin [EC:3.4.21.4]; K01312	PREDICTED: trypsin [EC:3.4.21.4]; [Plutella xylostella]
LOC105393240	14.77	2.86	5.65	0	0	0	8.55585	4.93459e-08	PRSS1_2_3; trypsin [EC:3.4.21.4]; K01312	PREDICTED: trypsin CFT-1-like [Plutella xylostella]
LOC105388354	7.05	34.77	17.77	0.12	0.6	0	5.64594	6.82008e-08	PRSS1_2_3; trypsin [EC:3.4.21.4]; K01312	PREDICTED: trypsin [EC:3.4.21.4]; LOC105388354 [Plutella xylostella]
LOC105384235	7.06	2.27	5.1	0	0.12	0	5.89179	1.65403e-07	NA	PREDICTED: trypsin alpha-4-like [Plutella xylostella]
LOC105384556	5.13	2.71	10.82	0.64	0	0	4.51714	0.00608728	NA	PREDICTED: trypsin-1-like [Plutella xylostella]
LOC105382108	3.12	3.87	1.16	0.58	0.05	0.25	2.90552	0.00405517	NA	PREDICTED: cadherin-23 [Plutella xylostella]
LOC105389983	2.49	3.33	1	0.72	0.2	0.29	2.1288	0.0141324	FAT4; protocadherin Fat 4; K16669	PREDICTED: cadherin-related tumor suppressor [Plutella xylostella]
LOC105380166	2.11	29.63	52.71	0.56	0.45	2.27	4.29211	0.00104197	ATPase subunit beta; K01540; ATP1B, CD298; sodium/potassium-transporting	PREDICTED: uncharacterized protein LOC105380166 [Plutella xylostella]
LOC105383392	63.26	409.73	63.63	10.45	6.14	15.96	3.73248	0.0022058	NA	PREDICTED: serpin B13 isoform X2 [Plutella xylostella]
LOC105387001	94.21	148.99	84.56	21.81	6.37	14.84	2.67634	0.00834793	SERPINB; serpin B; K13963	PREDICTED: serpin B3-like [Plutella xylostella]
LOC105380657	66.16	23.59	51.28	2.6	2.48	4.31	3.19787	4.65085e-05	E3.1.3.1, phoA, phoB; alkaline phosphatase [EC:3.1.3.1]; K01077	PREDICTED: alkaline phosphatase, tissue-nonspecific isozyme-like [Plutella xylostella]
LOC105398431	13	7.36	18.21	1.18	0.48	0.96	3.25383	4.7432e-05	E3.1.3.1, phoA, phoB; alkaline phosphatase [EC:3.1.3.1]; K01077	PREDICTED: alkaline phosphatase-like [Plutella xylostella]
LOC105383909	24.13	291.15	318.48	1.42	3.67	5.98	5.33729	4.23231e-05	E3.2.1.14; chitinase [EC:3.2.1.14]; K01183	PREDICTED: probable chitinase 2 [Plutella xylostella]
LOC105392303	12.51	165.39	179.73	2.03	2.42	6.28	4.63054	0.000199906	E3.2.1.14; chitinase [EC:3.2.1.14]; K01183	PREDICTED: probable endochitinase [Plutella xylostella]
LOC105389028	6.5	355.91	41.22	2.5	1.06	3.37	5.5378	0.000438291	E3.2.1.14; chitinase [EC:3.2.1.14]; K01183	PREDICTED: endochitinase [Plutella xylostella]
LOC105383937	8.99	45.79	72.56	0.48	5.78	5.09	2.86558	0.0446268	UGT; glucuronosyltransferase [EC:2.4.1.17]; K00699	PREDICTED: UDP-glucuronosyltransferase 2B14-like [Plutella xylostella]
LOC105380166	2.11	29.63	52.71	0.56	0.45	2.27	4.29211	0.00104197	ATP1B, CD298; sodium/potassium-transporting ATPase subunit beta; K01540	PREDICTED: uncharacterized protein LOC105380166 [Plutella xylostella]
LOC105382181	99.23	70.14	80.68	23.32	7.91	15.01	2.19397	0.0405289	NA	PREDICTED: sodium-dependent nutrient amino acid transporter 1-like isoform X2 [Plutella xylostella]
			Down-regulated
Gene	Bt-DBM_1	Bt-DBM_2	Bt-DBM_3	FOH-DBM_1	FOH-DBM_2	FOH-DBM_3	logFC	FDR	KEGG	NR
LOC105395328	7.88	6.24	2.93	3.33	54.7	39.51	-2.97985	0.0451852	TBXAS1, CYP5A; thromboxane-A synthase [EC:5.3.99.5]; K01832	PREDICTED: cytochrome P450 6B6-like [Plutella xylostella]
LOC105394699	3.83	18.19	24.93	10.77	167.83	193.61	-3.55967	0.0153209	TBXAS1, CYP5A; thromboxane-A synthase [EC:5.3.99.5]; K01832	PREDICTED: cytochrome P450 6B5-like [Plutella xylostella]
LOC105381077	0.19	0	0	13.6	3	2.54	-7.3677	1.56e-05	NA	PREDICTED: cytochrome P450 4c21-like [Plutella xylostella]
LOC105380707	30.62	19.25	11.41	143.78	131.53	130.55	-3.0288	0.00451145	GST, gst; glutathione S-transferase [EC:2.5.1.18]; K00799	PREDICTED: glutathione S-transferase 1-1-like [Plutella xylostella]
LOC105389269	9.21	17.23	17.68	65.42	167.24	133.78	-3.57723	0.000750496	GST, gst; glutathione S-transferase [EC:2.5.1.18]; K00799	PREDICTED: glutathione S-transferase; LOC105389269 [Plutella xylostella]
LOC105397896	5.42	51.18	59.67	48.37	307.54	549.4	-3.45989	0.0168224	CES1; carboxylesterase 1 [EC:3.1.1.1]; K01044	PREDICTED: juvenile hormone esterase-like [Plutella xylostella]
LOC105391951	18.49	21.66	22.26	73.54	50.93	150.35	-2.40563	0.0168224	UGT; glucuronosyltransferase [EC:2.4.1.17]; K00699	PREDICTED: LOW QUALITY PROTEIN: UDP-glucuronosyltransferase 1-7C-like [Plutella xylostella]
LOC105390263	0.3	0.16	0.09	0.82	1.48	4.62	-3.95238	0.0129387	AADAT, KAT2; kynurenine/2-aminoadipate aminotransferase [EC:2.6.1.7 2.6.1.39]; K00825	PREDICTED: kynurenine/alpha-aminoadipate aminotransferase, mitochondrial-like [Plutella xylostella]
LOC105393944	2.13	5.79	9.06	35.27	11.84	29.5	-2.52126	0.00962798	UGT; glucuronosyltransferase [EC:2.4.1.17]; K00699	PREDICTED: UDP-glucuronosyltransferase 2B2-like [Plutella xylostella]
LOC105385124	6.38	7.28	6.66	36.56	9.52	25.79	-2.0617	0.048187	E1.1.1.40, maeB; malate dehydrogenase (oxaloacetate-decarboxylating)(NADP+) [EC:1.1.1.40]; K00029	PREDICTED: NADP-dependent malic enzyme isoform X5 [Plutella xylostella]
LOC105388988	41.73	34.95	21.48	332.74	90.04	118.01	-2.6869	0.0167393	DPYD; dihydropyrimidine dehydrogenase (NADP+) [EC:1.3.1.2]; K00207	PREDICTED: dihydropyrimidine dehydrogenase [NADP(+)]-like [Plutella xylostella]
LOC105397674	2.02	0.13	0.36	62.21	1.15	6.18	-4.87588	0.00995781	XDH; xanthine dehydrogenase/oxidase [EC:1.17.1.4 1.17.3.2]; K00106	PREDICTED: xanthine dehydrogenase-like, partial [Plutella xylostella]
LOC105386722	7.02	69.2	34.15	43.13	194.56	294.83	-2.7506	0.0480216	PRSS1_2_3; trypsin [EC:3.4.21.4]; K01312	PREDICTED: trypsin, alkaline B-like, partial [Plutella xylostella]
LOC105395449	0.2	0.2	0	1.9	0.59	1.47	-3.59241	0.0417969	PRSS1_2_3; trypsin [EC:3.4.21.4]; K01312	PREDICTED: trypsin, alkaline B-like [Plutella xylostella]
LOC105394359	7.61	44.71	39.05	10.96	957.89	31.74	-4.36255	0.0368034	PRSS1_2_3; trypsin [EC:3.4.21.4]; K01312	PREDICTED: trypsin, alkaline C-like [Plutella xylostella]
LOC105391879	4.22	47.72	39.69	24.4	199.2	425.3	-3.27817	0.0301222	PRSS1_2_3; trypsin [EC:3.4.21.4]; K01312	PREDICTED: trypsin, alkaline B-like [Plutella xylostella]
LOC105380872	3.11	7.95	5.9	6.9	106.8	98.51	-4.18216	0.00151552	PRSS1_2_3; trypsin [EC:3.4.21.4]; K01312	PREDICTED: trypsin, alkaline C-like [Plutella xylostella]
LOC105380870	0.29	0.83	0	24.91	28.13	40.25	-6.84878	5.72696e-17	PRSS1_2_3; trypsin [EC:3.4.21.4]; K01312	PREDICTED: trypsin, alkaline A-like [Plutella xylostella]
LOC105392199	248.22	496.17	234.21	7717.05	5267.49	9136.8	-5.28056	7.52029e-15	PRSS1_2_3; trypsin [EC:3.4.21.4]; K01312	PREDICTED: trypsin, alkaline B-like [Plutella xylostella]
LOC105383594	6.25	8.86	6.18	153.61	84.35	172.66	-5.05455	3.65899e-14	PRSS1_2_3; trypsin [EC:3.4.21.4]; K01312	PREDICTED: trypsin, alkaline B-like [Plutella xylostella]
LOC105388740	75.79	97.11	97.54	336.17	395.41	419.58	-2.5026	0.0148618	ATPeV1B, ATP6B; V-type H+-transporting ATPase subunit B; K02147	PREDICTED: ATPase subunit B-like [Plutella xylostella]
LOC105385590	7.52	5.94	7.15	116.65	36.94	50.08	-3.57821	0.000414488	ABCB1, CD243; ATP-binding cassette, subfamily B (MDR/TAP), member 1 [EC:7.6.2.2]; K05658	PREDICTED: ATP-binding cassette; multidrug resistance protein 1-like [Plutella xylostella]
LOC105393129	1.4	5.81	7.95	13.69	15.35	19.96	-2.16183	0.0373565	NA	PREDICTED: putative sodium-dependent multivitamin transporter isoform X2 [Plutella xylostella]
LOC105392875	14.19	37.59	35.33	41.5	136.79	177.74	-2.50969	0.0346976	NA	PREDICTED: sodium-independent sulfate anion transporter-like isoform X2 [Plutella xylostella]
LOC105396313	5.14	12.23	14.11	39.53	26.12	41.69	-2.16187	0.0338975	NA	PREDICTED: facilitated trehalose transporter Tret1-like isoform X3 [Plutella xylostella]
LOC105381390	10.22	6.87	12.32	21.03	31.85	66.19	-2.33796	0.0299987	NA	PREDICTED: facilitated trehalose transporter Tret1-2 homolog [Plutella xylostella]
LOC105382129	2.41	10.58	8.41	40.34	22.42	30.55	-2.52854	0.0130012	NA	PREDICTED: facilitated trehalose transporter Tret1-like isoform X3 [Plutella xylostella]
LOC105390847	0.39	2.62	11.54	26.25	26.2	61.96	-3.44086	0.00909343	NA	PREDICTED: facilitated trehalose transporter Tret1-like [Plutella xylostella]
LOC105390027	35.86	89.33	113.91	323.47	469.53	733.99	-3.11652	0.00289618	serB, PSPH; phosphoserine phosphatase [EC:3.1.3.3]; K01079	PREDICTED: phosphoserine phosphatase [Plutella xylostella]
LOC105383743	45.81	154.31	156.96	481.68	665.72	918.2	-2.9925	0.00522501	serB, PSPH; phosphoserine phosphatase [EC:3.1.3.3]; K01079	PREDICTED: phosphoserine phosphatase-like [Plutella xylostella]
LOC105398361	14.08	44.07	27.17	53.7	125.17	125.42	-2.32696	0.0463559	CARP, pepA; leucyl aminopeptidase [EC:3.4.11.1]; K01255	PREDICTED: putative aminopeptidase W07G4.4 [Plutella xylostella]
LOC105389793	5.29	8.34	5.77	7.19	18.51	54.58	-2.33451	0.0434621	NA	PREDICTED: probable aminopeptidase NPEPL1 [Plutella xylostella]
LOC105382027	0.78	0.61	0.39	1.74	2.38	2.07	-2.16837	0.0386948	E3.2.1.14; chitinase [EC:3.2.1.14]; K01183	PREDICTED: probable chitinase 3 [Plutella xylostella]
LOC105381408	0.27	1.87	3.15	2.92	9.47	31.7	-3.41555	0.00983432	E3.2.1.14; chitinase [EC:3.2.1.14]; K01183	PREDICTED: chitotriosidase-1-like [Plutella xylostella]
LOC105394199	0.43	1.08	0.3	2.35	4.7	3.08	-2.95808	0.00612852	E3.2.1.14; chitinase [EC:3.2.1.14]; K01183	PREDICTED: probable chitinase 3 [Plutella xylostella]
LOC105388338	8.41	19.24	28.97	34.87	108.72	70.14	-2.52054	0.0378663	ABCC4; ATP-binding cassette, subfamily C (CFTR/MRP), member 4; K05673	PREDICTED: multidrug resistance-associated protein 4-like [Plutella xylostella]
LOC105396483	0	0.05	0.29	0.52	0.6	2.61	-3.6071	0.030721	glutamate receptor ionotropic;GRIN1, NMDA 1; K05208	PREDICTED: glutamate [NMDA] receptor subunit 1-like, partial [Plutella xylostella]
LOC105391951	18.49	21.66	22.26	73.54	50.93	150.35	-2.40563	0.0168224	UGT; glucuronosyltransferase [EC:2.4.1.17]; K00699	PREDICTED: UDP-glucuronosyltransferase 1-7C-like [Plutella xylostella]
LOC105393944	2.13	5.79	9.06	35.27	11.84	29.5	-2.52126	0.00962798	UGT; glucuronosyltransferase [EC:2.4.1.17]; K00699	PREDICTED: UDP-glucuronosyltransferase 2B2-like [Plutella xylostella]
LOC105396313	5.14	12.23	14.11	39.53	26.12	41.69	-2.16187	0.0338975	NA	PREDICTED: facilitated trehalose transporter Tret1-like isoform X3 [Plutella xylostella]
LOC105381390	10.22	6.87	12.32	21.03	31.85	66.19	-2.33796	0.0299987	NA	PREDICTED: facilitated trehalose transporter Tret1-2 homolog [Plutella xylostella]
LOC105381246	1.58	2	0.27	48.27	1.8	2.35	-3.90408	0.0219502	NA	PREDICTED: facilitated trehalose transporter Tret1-like [Plutella xylostella]
LOC105386035	0.71	0.95	0.3	32.91	0.46	1.33	-4.28427	0.0169219	NA	PREDICTED: facilitated trehalose transporter Tret1-like [Plutella xylostella]
LOC105382129	2.41	10.58	8.41	40.34	22.42	30.55	-2.52854	0.0130012	NA	PREDICTED: facilitated trehalose transporter Tret1-like isoform X3 [Plutella xylostella]
LOC105389245	2.6	9.07	2.17	13.24	29.39	26.61	-2.78458	0.0120713	NA	PREDICTED: facilitated trehalose transporter Tret1-like [Plutella xylostella]
LOC105385524	7.61	0.39	0.25	250.67	9.03	25.02	-5.08593	0.0118289	NA	PREDICTED: facilitated trehalose transporter Tret1-like [Plutella xylostella]
LOC105380778	3.58	14.87	20.38	18.36	109.47	131.03	-3.28451	0.0101108	NA	PREDICTED: facilitated trehalose transporter Tret1-like [Plutella xylostella]
LOC105390847	0.39	2.62	11.54	26.25	26.2	61.96	-3.44086	0.00909343	NA	PREDICTED: facilitated trehalose transporter Tret1-like [Plutella xylostella]
LOC105393129	1.4	5.81	7.95	13.69	15.35	19.96	-2.16183	0.0373565	NA	PREDICTED: putative sodium-dependent multivitamin transporter isoform X2 [Plutella xylostella]
LOC105392875	14.19	37.59	35.33	41.5	136.79	177.74	-2.50969	0.0346976	NA	PREDICTED: sodium-independent sulfate anion transporter-like isoform X2 [Plutella xylostella]
LOC105398710	16.63	11.35	17.26	50.92	41.98	84.85	-2.26678	0.0265022	MAO, aofH; monoamine oxidase [EC:1.4.3.4]; K00274	PREDICTED: sodium-coupled monocarboxylate transporter 2-like [Plutella xylostella]
LOC105394398	0.31	0.73	2.16	0.76	3.93	25.91	-3.5331	0.0231021	SLC17A5; MFS transporter, ACS family, solute carrier family 17 (sodium-dependent inorganic phosphate cotransporter), member 5; K12301	PREDICTED: putative inorganic phosphate cotransporter, partial [Plutella xylostella]
LOC105390289	1.78	2.16	0.7	58.05	1.36	9.34	-4.01814	0.00641336	NA	PREDICTED: LOW QUALITY PROTEIN: sodium-independent sulfate anion transporter-like [Plutella xylostella]
LOC105392901	3.64	3.85	2.32	13.33	747.18	176.17	-7.61237	1.40233e-06	aminopeptidase N; ANPEP, CD13; [EC:3.4.11.2]; K11140	PREDICTED: membrane alanyl aminopeptidase-like [Plutella xylostella]
LOC105386580	14.76	25.02	4.82	31.68	500.5	130.04	-4.93726	0.000177074	aminopeptidase N; ANPEP, CD13; [EC:3.4.11.2]; K11140	PREDICTED: aminopeptidase N [Plutella xylostella]
LOC105390988	14.57	18.81	5.35	6.93	346.37	93.5	-4.5898	0.00103481	aminopeptidase N ; ANPEP, CD13; [EC:3.4.11.2]; K11140	PREDICTED: membrane alanyl aminopeptidase-like [Plutella xylostella]
LOC105389988	0.97	0.94	0	10.02	0.28	2.87	-2.97561	0.0250189	NA	PREDICTED: protocadherin-15 [Plutella xylostella]

## Sheet: Bt vs CL
		Table S3 The differentially expressed genes between Bt-resistant (Bt-DBM) and chlorantraniliprole resistant strains (CL-DBM) of Plutelle xylostella
					Bt-DBM vs CL-DBM
		Up-regulated
Gene	Bt-DBM_1	Bt-DBM_2	Bt-DBM_3	CL-DBM_1	CL-DBM_2	CL-DBM_3	logFC	FDR	KEGG	NR
LOC105380553	25.69	29.66	1.03	0.13	0.21	1.27	5.85591	0.00696345	TBXAS1, CYP5A; thromboxane-A synthase [EC:5.3.99.5]; K01832	PREDICTED: cytochrome P450 6B7-like [Plutella xylostella]
LOC105383631	1.29	5.41	10.44	0.44	0.49	0	3.84414	0.0182804	TBXAS1, CYP5A; thromboxane-A synthase [EC:5.3.99.5]; K01832	PREDICTED: cytochrome P450 9e2-like [Plutella xylostella]
LOC105383603	14.37	12.37	22.21	0.61	0	1.02	5.43457	0.000249469	NA	PREDICTED: probable cytochrome P450 9f2 [Plutella xylostella]
LOC105388622	1.79	7.15	4.24	0.13	0.3	0	4.55785	0.00363297	NA	PREDICTED: cytochrome P450 6B5-like, partial [Plutella xylostella]
LOC105395717	5.38	13.03	27.8	2.02	1.88	0	3.46205	0.00373683	NA	PREDICTED: probable cytochrome P450 6a13 [Plutella xylostella]
LOC105381873	11.76	12.4	0.04	0	0.07	0	7.85844	0.00363297	glutathione peroxidase [EC:1.11.1.12]; K05361; JHEH; juvenile hormone epoxide hydrolase; K10719	PREDICTED: juvenile hormone epoxide hydrolase-like [Plutella xylostella]
LOC105395925	2.65	2.66	1.73	0.26	0.07	0	4.23118	0.0202143	glutathione peroxidase [EC:1.11.1.12]; K05361; JHEH; juvenile hormone epoxide hydrolase; K10719	PREDICTED: juvenile hormone epoxide hydrolase-like [Plutella xylostella]
LOC105398184	142.05	0.89	0.79	0.64	1.31	0	6.44828	0.0108801	NA	acetylcholine receptor subunit alpha-like, partial [Plutella xylostella]
LOC105390205	0.64	6.89	9.67	0.57	0.77	0.32	3.26571	0.0231732	NA	PREDICTED: acetylcholinesterase-like isoform X4 [Plutella xylostella]
LOC105387913	12.3	74.76	248.94	3.35	3.47	13.05	3.71612	0.0209319	CES1; carboxylesterase 1 [EC:3.1.1.1]; K01044	PREDICTED: juvenile hormone esterase-like, partial [Plutella xylostella]
LOC105390996	8.6	36.47	7.45	3.56	4.38	2.06	2.43362	0.0409395	ANPEP, CD13; aminopeptidase N [EC:3.4.11.2]; K11140	PREDICTED: aminopeptidase N-like [Plutella xylostella]
LOC105380657	1.04	24.07	14.29	2.5	1.14	0.7	3.08826	0.0492204	E3.1.3.1, phoA, phoB; alkaline phosphatase [EC:3.1.3.1]; K01077	PREDICTED: alkaline phosphatase, tissue-nonspecific isozyme-like [Plutella xylostella]
LOC105380166	2.11	29.63	52.71	0.99	2.87	0	4.35422	0.00319745	CD298; sodium/potassium-transporting ATPase subunit beta	sodium/potassium-transporting ATPase subunit beta LOC105380166 [Plutella xylostella]
LOC105384701	0.04	17.73	36.57	1.16	0.55	0.76	4.29036	0.03303	NA	PREDICTED: ATPase IF [Plutella xylostella]
LOC105382172	1.43	61.92	12.56	0.24	0.67	0	6.01709	0.00119558	PRSS1_2_3; trypsin [EC:3.4.21.4]; K01312	PREDICTED: trypsin CFT-1-like [Plutella xylostella]
LOC105383575	4.17	10.57	2.97	0	0	0	8.59511	0.00186856	PRSS1_2_3; trypsin [EC:3.4.21.4]; K01312	PREDICTED: trypsin, alkaline C-like [Plutella xylostella]
LOC105386029	2.27	15.99	9.65	0.19	0.53	0	4.86777	0.00196649	NA	PREDICTED: trypsin-1-like [Plutella xylostella]
LOC105391590	31.81	316.12	341.93	13.14	5.94	16.07	4.06322	0.00224639	NA	PREDICTED: trypsin, alkaline A-like isoform X2 [Plutella xylostella]
LOC105384400	2.51	13.15	16.81	0.8	0.44	0	4.41959	0.00271558	NA	PREDICTED: trypsin-1-like [Plutella xylostella]
LOC105380869	13.68	146.78	356.33	0.75	3	8.73	5.20585	0.0027812	PRSS1_2_3; trypsin [EC:3.4.21.4]; K01312	PREDICTED: trypsin CFT-1-like [Plutella xylostella]
LOC105383918	0	3.29	12.42	0	0	0	8.72662	0.0153795	PRSS1_2_3; trypsin [EC:3.4.21.4]; K01312	PREDICTED: trypsin-like [Plutella xylostella]
LOC105384397	2.17	9.06	8.08	1	0.55	0	3.39782	0.0229987	NA	PREDICTED: trypsin-1-like [Plutella xylostella]
LOC105382661	0.35	22.44	16.18	0.85	1.28	0	3.94614	0.0271583	PRSS1_2_3; trypsin [EC:3.4.21.4]; K01312	PREDICTED: trypsin, alkaline C-like [Plutella xylostella]
LOC105391580	4.15	54.42	39.32	0.41	0.68	4.16	4.8262	0.0272035	NA	PREDICTED: trypsin, alkaline C-like [Plutella xylostella]
LOC105381246	1.58	2	0.27	0	0	0	7.30072	0.0395702	NA	PREDICTED: facilitated trehalose transporter Tret1-like [Plutella xylostella]
LOC105387387	48.89	44.68	0.16	1.84	0.82	1.15	4.76332	0.0189856	katE, CAT, catB, srpA; catalase [EC:1.11.1.6]; K03781	PREDICTED: catalase-2-like [Plutella xylostella]
LOC105389213	12.96	2.52	0.05	0	0.24	0	5.80473	0.0299319	katE, CAT, catB, srpA; catalase [EC:1.11.1.6]; K03781	PREDICTED: catalase-like [Plutella xylostella]
LOC105397185	29.53	55.56	39.13	6.05	10.9	0	2.75105	0.0240063	(GABA receptor modulator; K08762;binding inhibitor	PREDICTED: acyl-CoA-binding protein homolog [Plutella xylostella]
LOC105383759	7.63	13.21	18.22	0.38	3.77	0	3.00703	0.0319569	ABCC4; ATP-binding cassette, subfamily C (CFTR/MRP), member 4; K05673	PREDICTED: uncharacterized protein LOC105383759 [Plutella xylostella]
LOC105382331	70.64	78.49	1.73	0.61	1.14	1.84	5.61037	0.00186856	UGT; glucuronosyltransferase [EC:2.4.1.17]; K00699	PREDICTED: UDP-glucuronosyltransferase 2C1-like [Plutella xylostella]
LOC105389450	0.37	2.76	4.89	0.22	0	0	4.92569	0.0223819	UGT; glucuronosyltransferase [EC:2.4.1.17]; K00699	PREDICTED: UDP-glucuronosyltransferase 2B18-like isoform X2 [Plutella xylostella]
LOC105393944	2.13	5.79	9.06	0.69	0.81	0.49	3.05922	0.0228737	UGT; glucuronosyltransferase [EC:2.4.1.17]; K00699	PREDICTED: UDP-glucuronosyltransferase 2B2-like [Plutella xylostella]
LOC105383987	40.31	61.16	54.01	6.31	6.92	0	3.47146	0.00124014	LSC1; succinyl-CoA synthetase alpha subunit [EC:6.2.1.4 6.2.1.5]; K01899	PREDICTED: succinyl-CoA ligase [ADP/GDP-forming] subunit alpha, mitochondrial-like [Plutella xylostella]
LOC105381636	0.99	6.66	18.72	0.4	0.22	0	5.04306	0.00661841	NA	PREDICTED: mannan-binding lectin serine protease 2-like, partial [Plutella xylostella]
LOC105394481	0.14	7.19	1.78	0.11	0.12	0	5.02605	0.00763552	NA	PREDICTED: mucin-17 [Plutella xylostella]
LOC105387636	0.56	8.5	6.18	0.17	0.18	0.42	4.59231	0.0177853	NA	PREDICTED: serine proteinase stubble-like [Plutella xylostella]
LOC105394935	3.12	32.76	31.48	3.06	1.12	2.56	3.2718	0.0271583	NA	PREDICTED: collagenase-like [Plutella xylostella]
LOC105380052	3.83	4.32	6.95	0.69	0.69	0	3.25092	0.00876216	NA	PREDICTED: uncharacterized protein LOC105380052 [Plutella xylostella]
LOC105381129	16.96	3.32	14.56	0	0.28	0	6.26842	3.75859e-09	GALNT; polypeptide N-acetylgalactosaminyltransferase [EC:2.4.1.41]; K00710	PREDICTED: polypeptide N-acetylgalactosaminyltransferase 1-like [Plutella xylostella]
LOC105384268	13.75	2.39	13.65	0	0	0	9.15012	5.54024e-09	GALNT; polypeptide N-acetylgalactosaminyltransferase [EC:2.4.1.41]; K00710	PREDICTED: polypeptide N-acetylgalactosaminyltransferase 1-like isoform X2 [Plutella xylostella]
LOC105384268	13.75	2.39	13.65	0	0	0	9.15012	5.54024e-09	GALNT; polypeptide N-acetylgalactosaminyltransferase [EC:2.4.1.41]; K00710	PREDICTED: polypeptide N-acetylgalactosaminyltransferase 1-like isoform X2 [Plutella xylostella]
LOC105398071	13.04	2.2	14.94	0.21	0.25	0.11	4.96241	3.624e-07	B4GALT1; beta-1,4-galactosyltransferase 1 [EC:2.4.1.22 2.4.1.90 2.4.1.38 2.4.1.-]; K07966; B4GALT2; beta-1,4-galactosyltransferase 2 [EC:2.4.1.22 2.4.1.90 2.4.1.38 2.4.1.-]; K07967	PREDICTED: beta-1,4-N-acetylgalactosaminyltransferase bre-4-like [Plutella xylostella]
LOC105390553	2.16	3.11	3.05	0.11	0.64	0.23	2.40898	0.00605425	SERPINB; serpin B; K13963	PREDICTED: serpin B;-like [Plutella xylostella]
LOC105383414	52.01	38.77	25.92	4.02	19.87	4.6	1.40156	0.0421127	SERPINB; serpin B; K13963	PREDICTED: serpin B; K13963; antichymotrypsin-2-like [Plutella xylostella]
	Down-regulated
Gene	Bt-DBM_1	Bt-DBM_2	Bt-DBM_3	CL-DBM_1	CL-DBM_2	CL-DBM_3	logFC	FDR	KEGG	NR
LOC105396367	1.75	4.34	7.07	267.86	232.69	97.56	-5.45046	1.90787e-08	COX7C; cytochrome c oxidase subunit 7c; K02272	PREDICTED: cytochrome c oxidase subunit 7C, mitochondrial-like [Plutella xylostella]
LOC105389044	2.84	1.35	1.59	15.43	22.67	5.47	-2.75761	0.0175678	NA	PREDICTED: cytochrome P450 4g15-like [Plutella xylostella]
LOC105381130	4.71	1.12	1.24	16.34	42.36	4.41	-2.84463	0.0410426	NA	PREDICTED: cytochrome P450 4C1-like [Plutella xylostella]
LOC105397896	25.57	4.41	30.37	499.45	450.66	395.55	-4.69408	1.27029e-06	carboxylesterase 1 [EC:3.1.1.1]; CES1; K01044	PREDICTED: juvenile hormone esterase-like [Plutella xylostella]
LOC105387913	3.35	3.47	13.05	80.79	90.72	110.98	-4.11603	1.53906e-05	carboxylesterase 1 [EC:3.1.1.1];CES1; K01044	PREDICTED: juvenile hormone esterase-like, partial [Plutella xylostella]
LOC105385802	0	0.05	0.11	1.74	1.65	0.79	-4.2738	0.0278945	FUT-1, FucTC; alpha-1,3-fucosyltransferase [EC:2.4.1.-]; K14464	glutathione
LOC105390678	0	0.06	0	0.75	2.06	0.94	-5.00946	0.0304877	PRSS1_2_3; trypsin [EC:3.4.21.4]; K01312	PREDICTED: trypsin CFT-1-like [Plutella xylostella]
LOC105392860	0	0.46	0	4.9	7.54	0	-4.367	0.0377095	PRSS1_2_3; trypsin [EC:3.4.21.4]; K01312	PREDICTED: trypsin CFT-1-like [Plutella xylostella]
LOC105393886	37.55	22.61	8.37	881.39	333.03	773.11	-5.71214	2.60786e-13	PRSS1_2_3; trypsin [EC:3.4.21.4]; K01312	PREDICTED: trypsin, alkaline C-like, partial [Plutella xylostella]
LOC105383573	3.25	11.1	3.23	184.7	134.26	277.62	-5.85032	1.00667e-13	PRSS1_2_3; trypsin [EC:3.4.21.4]; K01312	PREDICTED: trypsin-like [Plutella xylostella]
LOC105391896	636.79	728.21	199.67	8055.88	6038.68	9299.12	-4.71839	6.22796e-12	PRSS1_2_3; trypsin [EC:3.4.21.4]; K01312	PREDICTED: trypsin, alkaline C-like, partial [Plutella xylostella]
LOC105391617	166.69	172.7	64.4	1614.14	1265.92	1814.9	-4.34604	8.27672e-12	PRSS1_2_3; trypsin [EC:3.4.21.4]; K01312	PREDICTED: trypsin CFT-1-like isoform X1 [Plutella xylostella]
LOC105393541	0	0.06	0.03	5.32	0.28	0.86	-5.81058	0.00703129	ATPeF1B, ATP5B, ATP2; F-type H+-transporting ATPase subunit beta [EC:7.1.2.2]; K02133	PREDICTED: ATP synthase subunit beta, mitochondrial-like [Plutella xylostella]
LOC105397567	0	0.41	0	5.02	13.52	2.1	-5.11999	0.0063115	NA	PREDICTED: ATPase inhibitor mai-1, mitochondrial-like [Plutella xylostella]
LOC105385417	11.4	9.02	3.75	94.49	130.89	46.46	-3.31705	0.00156609	ACSL, fadD; long-chain acyl-CoA synthetase [EC:6.2.1.3]; K01897; IDH3; isocitrate dehydrogenase (NAD+) [EC:1.1.1.41]; K00030	PREDICTED: uncharacterized protein LOC105385417 [Plutella xylostella]
LOC105386486	0	0	0	1.48	1.11	1.17	-7.85123	0.00126251	NA	PREDICTED: glutamate receptor ionotropic, delta-1-like [Plutella xylostella]
LOC105391323	0	0.05	0	0.39	0.47	1.17	-4.56397	0.0274121	NA	PREDICTED: glutamate receptor 2-like [Plutella xylostella]
LOC105380814	0.3	0.29	0.22	2.5	3.91	2.68	-3.43409	0.00960667	NA	PREDICTED: facilitated trehalose transporter Tret1-like [Plutella xylostella]
LOC105392498	21.96	13.27	6.8	69.12	76.11	105.42	-2.58729	0.0289427	NA	PREDICTED: facilitated trehalose transporter Tret1-like [Plutella xylostella]
LOC105389206	0.29	0	0.08	1.75	5.37	0.58	-4.43499	0.0227641	SERPINB; serpin B; K13963	PREDICTED: serpin B5-like [Plutella xylostella]
LOC105387668	0.36	0.1	0.25	2.6	4.74	0.72	-3.49948	0.0411481	SERPINB; serpin B; K13963	PREDICTED: serpin B5-like [Plutella xylostella]

## Sheet: Bt vs SS
		Table S3 The differentially expressed genes between Bt-resistant (Bt-DBM) and susceptible strains (SS-DBM) of Plutelle xylostella
					Bt-DBM vs SS-DBM
			Up-regulated
Gene	Bt-DBM_1	Bt-DBM_2	Bt-DBM_3	SS-DBM_1	SS-DBM_2	SS-DBM_3	logFC	FDR	KEGG	NR
LOC105380553	25.69	29.66	1.03	0.09	0.41	0.13	6.26661	6.83368e-06	TBXAS1, CYP5A; thromboxane-A synthase [EC:5.3.99.5]; K01832	PREDICTED: cytochrome P450 6B7-like [Plutella xylostella]
LOC105382179	4.29	4.73	1.08	0.04	0.24	0.04	4.68064	0.000334233	NA	PREDICTED: cytochrome P450 6B1-like [Plutella xylostella]
LOC105381333	18.26	25.24	4.31	0.71	3.3	0.55	3.2114	0.00330121	NA	PREDICTED: cytochrome P450 9f2 [Plutella xylostella]
LOC105395717	5.38	13.03	27.8	0.79	3.6	0.88	2.75895	0.0034998	NA	PREDICTED: cytochrome P450 6a13 [Plutella xylostella]
LOC105386629	19.96	31.04	4.27	0.7	3.78	0.51	3.30415	0.00381316	NA	PREDICTED: cytochrome P450 9f2 [Plutella xylostella]
LOC105381398	8.47	58.48	89.8	6.13	4.85	6.7	2.58912	0.00846529	NA	PREDICTED: cytochrome b5 isoform B, partial [Plutella xylostella]
LOC105398192	11.7	12.6	5.36	0.17	3.01	0.72	2.74485	0.0184849	NA	PREDICTED: cytochrome P450 301a1, mitochondrial [Plutella xylostella]
LOC105381698	57.56	12.13	0.89	1.36	0.85	2.83	3.55502	0.0212777	NA	PREDICTED: cytochrome P450 CYP12A2-like [Plutella xylostella]
LOC105395780	9.19	22.36	67.71	7.12	3.04	4.11	2.23327	0.0363575	NA	PREDICTED: cytochrome b5-like [Plutella xylostella]
LOC105391921	28.09	0.68	2.83	0	0	0	10.8604	2.76002e-06	TBXAS1, CYP5A; thromboxane-A synthase [EC:5.3.99.5]; K01832	PREDICTED: cytochrome P450 6B4-like [Plutella xylostella]
LOC105398756	10.77	17.33	12.3	0.74	3.66	1.46	2.48486	0.00345105	ACHE; acetylcholinesterase [EC:3.1.1.7]; K01049	PREDICTED: carboxylesterase-6-like isoform X1 [Plutella xylostella]
LOC105382360	4.99	3.32	13.92	0.39	1.56	0.32	2.94425	0.00528491	NA	PREDICTED: carboxylesterase-6 [Plutella xylostella]
LOC105380166	2.11	29.63	52.71	0.21	1.2	0.31	5.18436	1.69932e-05	ATPase subunit beta; K01540; ATP1B, CD298; sodium/potassium-transporting	PREDICTED: uncharacterized protein LOC105380166 [Plutella xylostella]
LOC105388937	3.05	1.75	0.09	0.02	0.08	0.08	4.4842	0.00508931	ATP-binding cassette, subfamily B (MDR/TAP), member 1 [EC:7.6.2.2]; K05658	PREDICTED: multidrug resistance protein homolog 49-like [Plutella xylostella]
LOC105385548	13.23	3.61	5.61	1.09	1.26	0.94	2.50257	0.00951076	ATPase subunit beta-1-interacting protein 4 [Plutella xylostella];	ATPase subunit beta-1-interacting protein 4 [Plutella xylostella]; PREDICTED: sodium/potassium-transporting ATPase subunit beta-1-interacting protein 4 [Plutella xylostella]
LOC105393867	1.05	0.9	0.11	0	0.1	0	4.11677	0.0238112	ATPase subunit D; K02149; ATPeV1D, ATP6M; V-type H+-transporting	PREDICTED: uncharacterized protein LOC105393867 [Plutella xylostella]
LOC105384400	2.51	13.15	16.81	0	0.32	0.21	5.424	8.8334e-06	NA	PREDICTED: trypsin-1-like [Plutella xylostella]
LOC105384397	2.17	9.06	8.08	0.14	0.19	0	5.3587	1.19362e-05	NA	PREDICTED: trypsin-1-like [Plutella xylostella]
LOC105386029	2.27	15.99	9.65	0	0.63	0.33	4.4275	0.000421309	NA	PREDICTED: trypsin-1-like [Plutella xylostella]
LOC105394168	68.43	7.77	0.8	0	1.19	0.19	5.78481	0.00237963	NA	PREDICTED: trypsin II-P29-like [Plutella xylostella]
LOC105388354	31.39	2.92	0.13	0.12	0.6	0	5.48893	0.0112823	trypsin [EC:3.4.21.4]; K01312	PREDICTED: trypsin, LOC105388354 [Plutella xylostella]
LOC105384556	5.13	2.71	10.82	0.35	1.46	0.14	2.94566	0.017788	NA	PREDICTED: trypsin-1-like [Plutella xylostella]
LOC105384202	23.54	6.31	41.33	0.23	0.16	0	7.09275	1.18956e-09	NA	PREDICTED: facilitated trehalose transporter Tret1-like [Plutella xylostella]
LOC105382540	8.08	7.9	2.01	0.49	0.3	0.06	4.07884	0.00099468	NA	PREDICTED: facilitated trehalose transporter Tret1-like [Plutella xylostella]
LOC105398495	2.54	1.09	0	0	0	0	8.1989	0.00287659	NA	PREDICTED: facilitated trehalose transporter Tret1-like [Plutella xylostella]
LOC105381246	1.58	2	0.27	0	0.08	0	5.05604	0.00520794	NA	PREDICTED: facilitated trehalose transporter Tret1-like [Plutella xylostella]
LOC105383214	3.66	1	0.92	0	0	0.19	4.43574	0.0139045	NA	PREDICTED: facilitated trehalose transporter Tret1-like [Plutella xylostella]
LOC105398527	5.89	0.69	0	0	0.08	0.09	4.98451	0.0299493	NA	PREDICTED: facilitated trehalose transporter Tret1-like [Plutella xylostella]
LOC105386035	0.71	0.95	0.3	0.07	0.1	0	3.08687	0.043769	NA	PREDICTED: facilitated trehalose transporter Tret1-like [Plutella xylostella]
LOC105384526	76.77	51.09	2.81	0.43	0.56	0.16	6.63978	8.48875e-07	katE, CAT, catB, srpA; catalase [EC:1.11.1.6]; K03781	PREDICTED: catalase-like [Plutella xylostella]
LOC105387387	48.89	44.68	0.16	0.35	0	0.08	7.39937	0.000205424	katE, CAT, catB, srpA; catalase [EC:1.11.1.6]; K03781	PREDICTED: catalase-2-like [Plutella xylostella]
LOC105389213	12.96	2.52	0.05	0.05	0.05	0.05	6.43031	0.00148532	katE, CAT, catB, srpA; catalase [EC:1.11.1.6]; K03781	PREDICTED: catalase-like [Plutella xylostella]
LOC105385727	1.23	1.38	0.04	0	0	0	7.20456	0.00545641	katE, CAT, catB, srpA; catalase [EC:1.11.1.6]; K03781	PREDICTED: catalase-like [Plutella xylostella]
LOC105387834	3.3	4.02	0.46	0.16	1.02	0.16	2.14185	0.0228253	DCHS1_2, PCDH16_23; protocadherin-16/23; K16507	PREDICTED: protein dachsous-like [Plutella xylostella]
LOC105387842	1.3	1.33	0	0	0.12	0.06	3.39026	0.0403701	NA	PREDICTED: protocadherin-like wing polarity protein stan [Plutella xylostella]
LOC105389983	2.49	3.33	1	0.04	0.77	0.12	2.54218	0.00714883	FAT4; protocadherin Fat 4; K16669	PREDICTED: cadherin-related tumor suppressor [Plutella xylostella]
LOC105389028	6.5	355.91	41.22	1.1	4.24	0.14	5.9179	0.000382105	E3.2.1.14; chitinase [EC:3.2.1.14]; K01183	PREDICTED: endochitinase [Plutella xylostella]
LOC105380296	5.36	11.12	11.23	0.29	1.77	0.63	3.02682	0.00044883	CHS1; chitinase synthase [EC:2.4.1.16]; K00698	PREDICTED: uncharacterized protein LOC105380296 isoform X2 [Plutella xylostella]
LOC105390728	1.24	1.28	4.07	0.14	0.58	0.14	2.59344	0.0065501	E3.2.1.14; chitinase [EC:3.2.1.14]; K01183	PREDICTED: mucin-5AC isoform X2 [Plutella xylostella]
LOC105385326	11.35	12.97	15.53	0.81	4.72	0.61	2.46512	0.00996207	E3.2.1.14; chitinase [EC:3.2.1.14]; K01183	PREDICTED: probable chitinase 3 [Plutella xylostella]
LOC105383909	24.13	291.15	318.48	32.48	21.97	29.06	2.36618	0.0295837	E3.2.1.14; chitinase [EC:3.2.1.14]; K01183	PREDICTED: probable chitinase 2 [Plutella xylostella]
LOC105396871	0.57	0.96	2.2	0.06	0.3	0.03	2.87437	0.0346282	E3.2.1.14; chitinase [EC:3.2.1.14]; K01183	PREDICTED: endochitinase A-like [Plutella xylostella]
LOC105392303	12.51	165.39	179.73	18.64	11.67	17.11	2.34912	0.0351196	E3.2.1.14; chitinase [EC:3.2.1.14]; K01183	PREDICTED: probable endochitinase [Plutella xylostella]
LOC105384451	84.87	29.71	35.43	5.43	6.93	4.81	2.8651	0.00122431	NDUFA7; NADH dehydrogenase (ubiquinone) 1 alpha subcomplex subunit 7; K03951	PREDICTED: NADH dehydrogenase [ubiquinone] 1 alpha subcomplex subunit 7-like [Plutella xylostella]
LOC105383392	63.26	409.73	63.63	1.79	12.89	4.11	4.53483	8.06215e-05	NA	PREDICTED: serpin B13 isoform X2 [Plutella xylostella]
LOC105387001	94.21	148.99	84.56	3.83	25.58	5.64	2.9946	0.00154538	SERPINB; serpin B; K13963	PREDICTED: serpin B3-like [Plutella xylostella]
LOC105380657	7.63	1.93	6.72	0	0	0.31	4.85798	5.26867e-05	E3.1.3.1, phoA, phoB; alkaline phosphatase [EC:3.1.3.1]; K01077	PREDICTED: alkaline phosphatase, tissue-nonspecific isozyme-like [Plutella xylostella]
LOC105386383	1.46	0.57	5.56	0.13	0.17	0.16	3.55278	0.00153479	NA	PREDICTED: glutamate-receptor X5 [Plutella xylostella]
LOC105382331	70.64	78.49	1.73	0.41	0.36	0.21	6.98804	1.03966e-06	UGT; glucuronosyltransferase [EC:2.4.1.17]; K00699	PREDICTED: UDP-glucuronosyltransferase 2C1-like [Plutella xylostella]
LOC105387636	0.56	8.5	6.18	0	0.24	0.06	5.22685	0.000138481	NA	PREDICTED: serine proteinase stubble-like [Plutella xylostella]
LOC105387637	0.22	5.52	3.1	0	0.13	0	5.65072	0.000471945	NA	PREDICTED: serine proteinase stubble-like [Plutella xylostella]
LOC105393254	1.19	2.46	12.75	0	0.56	0.11	4.16072	0.00495869	NA	PREDICTED: serine proteinase stubble-like, partial [Plutella xylostella]
LOC105389050	0.37	2.32	3.93	0.02	0.38	0	3.66551	0.0177786	NA	PREDICTED: serine proteinase stubble [Plutella xylostella]
	Down-regulated
Gene	Bt-DBM_1	Bt-DBM_2	Bt-DBM_3	SS-DBM_1	SS-DBM_2	SS-DBM_3	logFC	FDR	KEGG	NR
LOC105395328	7.88	6.24	2.93	42.93	15.77	28.35	-2.7204	0.00358207	TBXAS1, CYP5A; thromboxane-A synthase [EC:5.3.99.5]; K01832	PREDICTED: cytochrome P450 6B6-like [Plutella xylostella]
LOC105386484	32.13	31.9	17.33	158	74.7	108.57	-2.44892	0.00512693	TBXAS1, CYP5A; thromboxane-A synthase [EC:5.3.99.5]; K01832	PREDICTED: cytochrome P450 6B6-like [Plutella xylostella]
LOC105394699	3.83	18.19	24.93	64.83	28.72	88.42	-2.54381	0.0112873	TBXAS1, CYP5A; thromboxane-A synthase [EC:5.3.99.5]; K01832	PREDICTED: cytochrome P450 6B5-like [Plutella xylostella]
LOC105392345	2.52	19.56	29.93	82.74	80.7	40.43	-2.46587	0.015298	TBXAS1, CYP5A; thromboxane-A synthase [EC:5.3.99.5]; K01832	PREDICTED: cytochrome P450 6B5-like [Plutella xylostella]
LOC105383408	1.51	17.17	9.76	58.82	23.15	28.44	-2.47711	0.0193308	NA	PREDICTED: cytochrome P450 6k1-like [Plutella xylostella]
LOC105386477	15.39	20.86	6.2	60.47	24.8	52.09	-2.09768	0.0349203	TBXAS1, CYP5A; thromboxane-A synthase [EC:5.3.99.5]; K01832	PREDICTED: cytochrome P450 6k1-like [Plutella xylostella]
LOC105389269	9.21	17.23	17.68	189.01	94.25	160.13	-3.81496	2.30879e-06	GST, gst; glutathione S-transferase [EC:2.5.1.18]; K00799	GST, gst; glutathione S-transferase LOC105389269 [Plutella xylostella]
LOC105380707	30.62	19.25	11.41	73.78	81.67	105.53	-2.41253	0.00728782	GST, gst; glutathione S-transferase [EC:2.5.1.18]; K00799	PREDICTED: glutathione S-transferase 1-1-like [Plutella xylostella]
LOC105386021	81.8	198.81	197.95	582.08	347.19	579.81	-2.15866	0.0108118	GST, gst; glutathione S-transferase [EC:2.5.1.18]; K00799	PREDICTED: glutathione S-transferase 1-like [Plutella xylostella]
LOC105392478	16.84	84.87	95.4	257.79	160.56	237.55	-2.27397	0.0153933	GST, gst; glutathione S-transferase [EC:2.5.1.18]; K00799	PREDICTED: glutathione S-transferase 1-like [Plutella xylostella]
LOC105391967	2.72	21.04	13.75	100.21	164.91	197.96	-4.10765	9.54062e-06	ACHE; acetylcholinesterase [EC:3.1.1.7]; K01049	PREDICTED: bile salt-activated lipase-like, partial [Plutella xylostella]
LOC105389660	0.41	5.09	6.53	33.59	32.59	43.43	-3.72272	0.000146496	ACHE; acetylcholinesterase [EC:3.1.1.7]; K01049	PREDICTED: esterase FE4-like [Plutella xylostella]
LOC105389647	4.45	57.99	26.17	239.88	156.31	265.45	-3.43212	0.00093015	ACHE; acetylcholinesterase [EC:3.1.1.7]; K01049	PREDICTED: LOW QUALITY PROTEIN: esterase FE4-like [Plutella xylostella]
LOC105391968	0.94	18.18	11.91	39.99	35.65	49.63	-2.53541	0.0175789	ACHE; acetylcholinesterase [EC:3.1.1.7]; K01049	PREDICTED: cholinesterase-like, partial [Plutella xylostella]
LOC105397896	5.42	51.18	59.67	499.45	450.66	395.55	-4.05564	3.11076e-05	CES1; carboxylesterase 1 [EC:3.1.1.1]; K01044	PREDICTED: juvenile hormone esterase-like [Plutella xylostella]
LOC105388740	75.79	97.11	97.54	270.67	533.55	361.96	-2.47352	0.00122144	ATPase subunit B; K02147	PREDICTED: V-type proton ATPase subunit B-like [Plutella xylostella]
LOC105380679	90.56	133.04	149.95	324.85	325.49	355.93	-1.86693	0.0200278	ATPase S1 subunit; K03662; ATPeVS1, ATP6S1; V-type H+-transporting	PREDICTED: uncharacterized protein LOC105380679 [Plutella xylostella]
LOC105392322	339.63	398.41	409.31	818.45	1104.36	988.82	-1.73222	0.0368803	ATPase subunit A [EC:7.1.2.2]; K02145; ATPeV1A, ATP6A; V-type H+-transporting	PREDICTED: V-type proton ATPase catalytic subunit A isoform X2 [Plutella xylostella]
LOC105396525	186.36	159.14	141.3	396.9	502.36	392.47	-1.74493	0.0384028	ATPase subunit B; K02147, ATPeV1B, ATP6B; V-type H+-transporting ATPase subunit B; K02147	PREDICTED: V-type proton ATPase subunit B-like [Plutella xylostella]
LOC105387841	3.97	13.76	6.33	17.31	40.27	20.19	-2.03302	0.0419729	ATPase subunit; K03661, ATPeV0B, ATP6F; V-type H+-transporting 21kDa proteolipid	PREDICTED: V-type proton ATPase subunit c''-like, partial [Plutella xylostella]
LOC105381286	6.34	2.01	1.79	7.11	31.64	6.68	-2.2936	0.0432275	ATPase subunit beta; K01540, ATP1B, CD298; sodium/potassium-transporting	PREDICTED: sodium/potassium-transporting ATPase subunit beta-2-like [Plutella xylostella]
LOC105384243	31.29	22.61	32.34	80.28	62.79	65.33	-1.66752	0.048512	ATPase subunit 6; K02131, ATPeF0F6, ATP5J; F-type H+-transporting	PREDICTED: ATP synthase-coupling factor 6, mitochondrial-like, partial [Plutella xylostella]
LOC105386722	7.02	69.2	34.15	559.19	626.51	603.96	-4.4982	2.50709e-06	PRSS1_2_3; trypsin [EC:3.4.21.4]; K01312	PREDICTED: trypsin, alkaline B-like, partial [Plutella xylostella]
LOC105386078	2.88	24.73	24.91	219.2	312.77	231.44	-4.34127	3.4535e-06	PRSS1_2_3; trypsin [EC:3.4.21.4]; K01312	PREDICTED: trypsin, alkaline B-like [Plutella xylostella]
LOC105391879	4.22	47.72	39.69	420.15	375.49	491.72	-4.34458	1.12235e-05	PRSS1_2_3; trypsin [EC:3.4.21.4]; K01312	PREDICTED: trypsin, alkaline B-like [Plutella xylostella]
LOC105394359	7.61	44.71	39.05	457.48	80.02	653.48	-4.31447	0.000131669	PRSS1_2_3; trypsin [EC:3.4.21.4]; K01312	PREDICTED: trypsin, alkaline C-like [Plutella xylostella]
LOC105393887	0.19	6.89	2.94	40.83	33.35	23.07	-3.71763	0.000474598	PRSS1_2_3; trypsin [EC:3.4.21.4]; K01312	PREDICTED: achelase-1-like [Plutella xylostella]
LOC105380872	3.11	7.95	5.9	37.83	25.44	20.33	-2.72895	0.000592085	PRSS1_2_3; trypsin [EC:3.4.21.4]; K01312	PREDICTED: trypsin, alkaline C-like [Plutella xylostella]
LOC105394363	104.65	746.17	335.68	4245.88	1076.73	3554.55	-3.45649	0.00106955	PRSS1_2_3; trypsin [EC:3.4.21.4]; K01312	PREDICTED: trypsin, alkaline C-like [Plutella xylostella]
LOC105388679	2.09	35.73	34.78	188.43	151.53	161.3	-3.32043	0.00170131	PRSS1_2_3; trypsin [EC:3.4.21.4]; K01312	PREDICTED: trypsin, alkaline A-like [Plutella xylostella]
LOC105393886	25.3	220.05	127.02	881.39	333.03	773.11	-2.96944	0.00375544	PRSS1_2_3; trypsin [EC:3.4.21.4]; K01312	PREDICTED: trypsin, alkaline C-like, partial [Plutella xylostella]
LOC105383594	6.55	48.33	34.23	153.61	84.35	172.66	-2.74936	0.00474324	PRSS1_2_3; trypsin [EC:3.4.21.4]; K01312	PREDICTED: trypsin, alkaline B-like [Plutella xylostella]
LOC105383570	1825.32	6855.74	6264.23	13712.9	9255.2	15267.2	-1.87763	0.0461741	PRSS1_2_3; trypsin [EC:3.4.21.4]; K01312	PREDICTED: trypsin, alkaline C-like [Plutella xylostella]
LOC105384827	0.65	0.39	0.21	7.93	26.03	11.09	-5.48828	6.56021e-09	NA	PREDICTED: facilitated trehalose transporter Tret1-like [Plutella xylostella]
LOC105380814	0.3	0.29	0.22	6.86	7	6.98	-5.09322	1.00139e-08	NA	PREDICTED: facilitated trehalose transporter Tret1-like [Plutella xylostella]
LOC105396667	0.3	1.34	1.05	10.62	23.15	18.61	-4.6698	1.62343e-08	NA	PREDICTED: facilitated trehalose transporter Tret1-like [Plutella xylostella]
LOC105381776	2.67	4.77	5.6	77.34	99.18	36.73	-4.40263	1.8962e-08	NA	PREDICTED: facilitated trehalose transporter Tret1-like [Plutella xylostella]
LOC105389237	0.2	1.47	1.33	21.17	19.24	12.6	-4.54271	1.16434e-07	NA	PREDICTED: facilitated trehalose transporter Tret1-2 homolog, partial [Plutella xylostella]
LOC105390846	0.43	4.13	1.96	19.93	34.82	13.1	-3.74988	4.0713e-05	NA	PREDICTED: facilitated trehalose transporter Tret1-like [Plutella xylostella]
LOC105383493	0.49	0.82	1.25	19.05	19.69	10.38	-4.64037	4.6908e-09	E3.2.1.14; chitinase [EC:3.2.1.14]; K01183	PREDICTED: chitotriosidase-1-like [Plutella xylostella]
LOC105381408	0.27	1.87	3.15	13.16	11.65	13.55	-3.34314	0.000318812	E3.2.1.14; chitinase [EC:3.2.1.14]; K01183	PREDICTED: chitotriosidase-1-like [Plutella xylostella]
LOC105383363	19.24	30.05	39.98	102.98	108.21	97.89	-2.22986	0.0032763	NDUFA11; NADH dehydrogenase (ubiquinone) 1 alpha subcomplex subunit 11; K03956	PREDICTED: uncharacterized protein LOC105383363 [Plutella xylostella]
LOC105389793	5.29	8.34	5.77	25.03	34.48	10.98	-2.18673	0.00648734	NA	PREDICTED: probable aminopeptidase NPEPL1 [Plutella xylostella]
LOC105385046	2.72	13.28	7.86	28.63	14.45	25.13	-2.02325	0.0297793	NA	PREDICTED: xaa-Pro aminopeptidase 1-like [Plutella xylostella]
LOC105390997	58.11	83.15	5.59	1202.79	569.19	1136.49	-5.1504	2.36294e-08	aminopeptidase N [EC:3.4.11.2];ANPEP, CD13; K11140	PREDICTED: membrane alanyl aminopeptidase-like [Plutella xylostella]
LOC105386096	3.58	1.97	2.26	5.02	19.29	4.4	-2.50745	0.000147193	aminopeptidase N [EC:3.4.11.2];ANPEP, CD13; K11140	PREDICTED: aminopeptidase N [Plutella xylostella]
LOC105390996	3.83	4.75	2.02	38.96	18.69	27.87	-3.79823	2.77991e-09	aminopeptidase N [EC:3.4.11.2];ANPEP, CD13; K11140	PREDICTED: aminopeptidase N-like [Plutella xylostella]
LOC105386254	80.56	168.2	25.74	1420.92	691.81	1491.14	-4.54049	1.49442e-08	aminopeptidase N [EC:3.4.11.2]; ANPEP, CD13; K11140	PREDICTED: membrane alanyl aminopeptidase-like [Plutella xylostella]
LOC105387965	0.21	0.25	0.23	5.38	3.32	6.68	-4.90369	2.88816e-06	NA	PREDICTED: glutamate receptor 1-like [Plutella xylostella]
LOC105387956	0	0.48	0.8	13.1	1.46	15.46	-5.07411	9.48679e-05	NA	PREDICTED: glutamate receptor 1-like [Plutella xylostella]
LOC105390819	0	0	0.1	0.65	0.07	1.39	-4.68483	0.0113423	NA	PREDICTED: glutamate receptor ionotropic, kainate 2-like [Plutella xylostella]
LOC105392587	0.7	0.07	0.3	2.05	1.96	2.65	-3.17843	0.0332674	NA	PREDICTED: neuropeptide Y receptor-like, partial [Plutella xylostella]
LOC105388506	0.09	3	5.43	38.3	7.87	70.78	-4.44326	0.00117255	UGT; glucuronosyltransferase [EC:2.4.1.17]; K00699	PREDICTED: UDP-glucuronosyltransferase 2B18-like [Plutella xylostella]
LOC105389450	0.37	2.76	4.89	18	3.64	29.38	-3.30259	0.00525671	UGT; glucuronosyltransferase [EC:2.4.1.17]; K00699	PREDICTED: UDP-glucuronosyltransferase 2B18-like isoform X2 [Plutella xylostella]
LOC105389540	1.18	0.64	5.84	18.32	6.31	13.18	-2.86807	0.0077642	UGT; glucuronosyltransferase [EC:2.4.1.17]; K00699	PREDICTED: UDP-glucuronosyltransferase 2B15-like [Plutella xylostella]
LOC105396483	0	0.05	0.29	0.52	0.6	2.61	-3.6071	0.030721	GRIN1; glutamate receptor ionotropic, NMDA 1; K05208	PREDICTED: glutamate [NMDA] receptor subunit 1-like, partial [Plutella xylostella]
LOC105383119	81.86	365.51	102.76	848.05	314.36	805.18	-2.34002	0.0230479	DBI, ACBP; diazepam-binding inhibitor (GABA receptor modulator, acyl-CoA-binding protein); K08762	PREDICTED: putative acyl-CoA-binding protein [Plutella xylostella]
LOC105383121	284.12	514.51	404.33	1094.2	764.88	1326.42	-1.87022	0.0303949	DBI, ACBP; diazepam-binding inhibitor (GABA receptor modulator, acyl-CoA-binding protein); K08762	PREDICTED: acyl-CoA-binding protein homolog [Plutella xylostella]
LOC105397186	160.07	826.51	335.86	1674.44	684.76	1756.95	-2.16203	0.0349266	DBI, ACBP; diazepam-binding inhibitor (GABA receptor modulator, acyl-CoA-binding protein); K08762	PREDICTED: putative acyl-CoA-binding protein [Plutella xylostella]
LOC105383743	45.81	154.31	156.96	900.62	780.15	874.17	-3.33316	4.50635e-05	serB, PSPH; phosphoserine phosphatase [EC:3.1.3.3]; K01079	PREDICTED: phosphoserine phosphatase-like [Plutella xylostella]
LOC105388338	8.41	19.24	28.97	81.94	66.58	103.52	-2.67338	0.00125186	ABCC4; ATP-binding cassette, subfamily C (CFTR/MRP), member 4; K05673	PREDICTED: multidrug resistance-associated protein 4-like [Plutella xylostella]
LOC105389954	7.32	20	23.28	61.91	62.55	69.92	-2.42905	0.00272673	ABCC4; ATP-binding cassette, subfamily C (CFTR/MRP), member 4; K05673	PREDICTED: multidrug resistance-associated protein 4-like isoform X3 [Plutella xylostella]
LOC105388339	4.6	3.26	6.7	17.09	14.6	14.85	-2.09299	0.00972135	ABCC4; ATP-binding cassette, subfamily C (CFTR/MRP), member 4; K05673	PREDICTED: multidrug resistance-associated protein 4-like [Plutella xylostella]
LOC105387094	10.77	11.55	19.25	48.64	23.16	32.46	-1.79357	0.037576	ABCC10; ATP-binding cassette, subfamily C (CFTR/MRP), member 10; K05674	PREDICTED: bile pigment transporter 1-like [Plutella xylostella]
LOC105386993	2.34	26.77	17.11	58.32	39.43	45.31	-2.15025	0.0433869	ABCC4; ATP-binding cassette, subfamily C (CFTR/MRP), member 4; K05673	PREDICTED: probable multidrug resistance-associated protein lethal(2)03659 [Plutella xylostella]
LOC105398335	1.65	0.78	1.12	3.31	5.45	3.2	-2.17226	0.00354608	NA	PREDICTED: DE-cadherin-like [Plutella xylostella]

## Sheet: BtC vs Bt
	Table S3 The differentially expressed genes between Bt-resistant (Bt-DBM) and strains resistant to mixture of Bt and Chlorantraniliprole (BtC-DBM) of Plutelle xylostella
			BtC-DBM vs Bt-DBM
			Up-regulated
Gene	BtC-DBM_1	BtC-DBM_2	BtC-DBM_3	Bt-DBM_1	Bt-DBM_2	Bt-DBM_3	logFC	FDR	KEGG	NR
LOC105395119	1.42	3.3	0.59	0	0.1	0.11	3.95134	0.00576052	SAD, CYP315A1; ecdysteroid 2-hydroxylase; K10722	PREDICTED: cytochrome P450 315a1, mitochondrial-like isoform X2 [Plutella xylostella]
LOC105382179	59.03	12.6	20.56	4.29	4.73	1.08	2.71647	0.00802426	NA	PREDICTED: cytochrome P450 6B1-like [Plutella xylostella]
LOC105382179	59.03	12.6	20.56	4.29	4.73	1.08	2.71647	0.00802426	NA	PREDICTED: cytochrome P450 6B1-like [Plutella xylostella]
LOC105392138	53.68	12.9	82.87	1.17	0.7	0.25	5.86356	3.59297e-06	GST, gst; glutathione S-transferase [EC:2.5.1.18]; K00799	PREDICTED: glutathione S-transferase 1-like [Plutella xylostella]
LOC105389468	3.48	2.64	6.74	0.61	0.28	0.04	3.50377	0.00823622	NA	PREDICTED: acetylcholinesterase [Plutella xylostella]
LOC105390291	13.68	146.78	356.33	0.75	3	8.73	5.20585	0.0027812	ACHE; acetylcholinesterase [EC:3.1.1.7]; K01049; CES1; carboxylesterase 1 [EC:3.1.1.1]; K01044	PREDICTED: acetylcholinesterase [EC:3];esterase FE4-like [Plutella xylostella]
LOC105392411	768.94	864.01	520.46	1128.11	943.45	1503.64	-1.52259	0.00831748	NA	PREDICTED: acetylcholinesterase-like [Plutella xylostella]
LOC105392147	5.15	1.92	2.1	0.19	0.15	0.86	2.56219	0.0227913	CES1; carboxylesterase 1 [EC:3.1.1.1]; K01044; NLGN; neuroligin; K07378	PREDICTED: carboxylesterase 1, neuroligin-4, Y-linked-like [Plutella xylostella]
LOC105393541	4.76	1.12	21.38	0	0.06	0.03	7.65038	4.89092e-06	ATPeF1B, ATP5B, ATP2; F-type H+-transporting ATPase subunit beta [EC:7.1.2.2]; K02133	PREDICTED: ATP synthase subunit beta, mitochondrial-like [Plutella xylostella]
LOC105386120	36.62	8.73	44.16	0.63	0	0.4	6.24693	6.96448e-06	ATPeFG, ATP5L, ATP20; F-type H+-transporting ATPase subunit g; K02140	PREDICTED: ATP synthase subunit g, mitochondrial-like [Plutella xylostella]
LOC105382346	10.6	5.24	16.35	0	0.4	0.21	5.10639	6.69731e-05	ATPase subunit d; K02138; ATPeF0D, ATP5H, ATP7; F-type H+-transporting	PREDICTED: ATP synthase subunit d, mitochondrial-like [Plutella xylostella]
LOC105393867	34.56	4.72	46.01	1.05	0.9	0.11	4.99237	8.682e-05	ATPase subunit D; K02149; ATPeV1D, ATP6M; V-type H+-transporting	PREDICTED: uncharacterized protein LOC105393867 [Plutella xylostella]
LOC105395748	4.57	0.39	1.12	0	0	0	8.03872	0.000243837	ATPase subunit beta [EC:7.1.2.2]; K02133; ATPeF1B, ATP5B, ATP2; F-type H+-transporting	PREDICTED: ATP synthase subunit beta, mitochondrial-like [Plutella xylostella]
LOC105382789	16.36	2.07	10.81	0.32	0.32	0	5.10823	0.00025167	ATPase subunit D; K02149; ATPeV1D, ATP6M; V-type H+-transporting	PREDICTED: V-type proton ATPase subunit D-like isoform X2 [Plutella xylostella]
LOC105383969	7.27	0.49	2.92	0.09	0	0	6.73813	0.000375765	ATPase subunit beta [EC:7.1.2.2]; K02133; ATPeF1B, ATP5B, ATP2; F-type H+-transporting	PREDICTED: ATP synthase subunit beta, mitochondrial-like [Plutella xylostella]
LOC105394092	13.54	0.6	1.09	0.15	0.15	0	5.17144	0.00197099	ATPase subunit beta [EC:7.1.2.2]; K02133; ATPeF1B, ATP5B, ATP2; F-type H+-transporting	PREDICTED: ATP synthase subunit beta, mitochondrial-like isoform X2 [Plutella xylostella]
LOC105395131	2.61	0.26	3.35	0.11	0.07	0	4.85134	0.00305253	ATPase subunit alpha [EC:7.2.2.13]; K01539; ATP1A; sodium/potassium-transporting	PREDICTED: sodium/potassium-transporting ATPase subunit alpha-2-like [Plutella xylostella]
LOC105381634	1.55	0.34	1.04	0.12	0.02	0	4.23332	0.0127581	ATPase subunit a; K02154; ATPeV0A, ATP6N; V-type H+-transporting	PREDICTED: V-type proton ATPase 116 kDa subunit a isoform 1-like [Plutella xylostella]
LOC105380165	1.68	4.07	0.87	0	0.15	0.33	3.21114	0.0352816	ATPase subunit beta; K01540; ATP1B, CD298; sodium/potassium-transporting	PREDICTED: sodium/potassium-transporting ATPase subunit beta-2-like [Plutella xylostella]
LOC105388782	2.87	1.27	2.97	0.37	0.29	0	3.10489	0.0470185	ATPase subunit gamma; K02136; ATPeF1G, ATP5C1, ATP3; F-type H+-transporting	PREDICTED: ATP synthase subunit gamma, mitochondrial-like [Plutella xylostella]
LOC105392860	12.8	9.23	28.78	0	0.46	0	6.15768	4.42206e-06	PRSS1_2_3; trypsin [EC:3.4.21.4]; K01312	PREDICTED: trypsin CFT-1-like [Plutella xylostella]
LOC105397427	5.27	1.66	7.94	0.12	0.05	0.53	4.03616	0.00231915	PRSS1_2_3; trypsin [EC:3.4.21.4]; K01312	PREDICTED: trypsin, alkaline B-like [Plutella xylostella]
LOC105394427	2.34	0.47	2.18	0	0	0	6.85602	0.00272433	NA	PREDICTED: trypsin-1-like [Plutella xylostella]
LOC105393240	14.77	2.86	5.65	0	0.8	0.1	4.06646	0.00287853	PRSS1_2_3; trypsin [EC:3.4.21.4]; K01312	PREDICTED: trypsin CFT-1-like [Plutella xylostella]
LOC105380753	13	4.32	2.07	0	0.18	0	5.51152	0.00298207	PRSS1_2_3; trypsin [EC:3.4.21.4]; K01312	PREDICTED: trypsin-like [Plutella xylostella]
LOC105390678	0.9	2.45	2.09	0	0.06	0	5.34027	0.0032631	PRSS1_2_3; trypsin [EC:3.4.21.4]; K01312	PREDICTED: trypsin CFT-1-like [Plutella xylostella]
LOC105392124	2.11	0.76	0.97	0	0	0	6.47286	0.00407621	NA	PREDICTED: trypsin-1-like [Plutella xylostella]
LOC105391645	1.94	3.14	4.29	0	0.31	0.08	3.94436	0.00435722	PRSS1_2_3; trypsin [EC:3.4.21.4]; K01312	PREDICTED: trypsin CFT-1-like [Plutella xylostella]
LOC105395449	1.98	1.2	5.72	0.2	0.2	0	4.18604	0.00460331	PRSS1_2_3; trypsin [EC:3.4.21.4]; K01312	PREDICTED: trypsin, alkaline B-like [Plutella xylostella]
LOC105392566	1.24	0.67	4.55	0	0.08	0	5.30248	0.010002	PRSS1_2_3; trypsin [EC:3.4.21.4]; K01312	PREDICTED: trypsin CFT-1-like [Plutella xylostella]
LOC105384235	7.06	2.27	5.1	0.63	0.5	0.2	3.07609	0.0146951	NA	PREDICTED: trypsin alpha-4-like [Plutella xylostella]
LOC105396708	2.87	0.58	1.24	0	0.13	0.14	3.37588	0.0214016	PRSS1_2_3; trypsin [EC:3.4.21.4]; K01312	PREDICTED: trypsin-like [Plutella xylostella]
LOC105395348	2.82	2.45	4.75	0	0.69	0.12	3.11157	0.0219614	PRSS1_2_3; trypsin [EC:3.4.21.4]; K01312	PREDICTED: trypsin-like isoform X1 [Plutella xylostella]
LOC105385111	1.98	0.53	2.05	0	0.09	0	4.46787	0.0301064	PRSS1_2_3; trypsin [EC:3.4.21.4]; K01312	PREDICTED: trypsin CFT-1-like [Plutella xylostella]
LOC105384013	320.16	282.45	171.48	21.81	6.37	14.84	3.53159	1.25874e-05	NA	PREDICTED: cadherin-87A-like [Plutella xylostella]
LOC105384013	16.14	10.39	7.95	0.87	0.07	0.24	4.20046	1.25874e-05	NA	PREDICTED: cadherin-87A-like [Plutella xylostella]
LOC105383163	3.62	1.5	2.33	0.22	0.31	0.38	2.59848	0.0230921	NA	PREDICTED: facilitated trehalose transporter Tret1-2 homolog [Plutella xylostella]
LOC105383214	19.83	22.36	3.9	3.66	1	0.92	2.5829	0.0287357	NA	PREDICTED: facilitated trehalose transporter Tret1-like [Plutella xylostella]
LOC105380814	2.07	1.68	1.65	0.3	0.29	0.22	2.36199	0.035512	NA	PREDICTED: facilitated trehalose transporter Tret1-like [Plutella xylostella]
LOC105380503	16.43	5.41	18.73	0	0.31	0.17	5.78851	5.25207e-06	NDUFS8; NADH dehydrogenase (ubiquinone) Fe-S protein 8 [EC:7.1.1.2 1.6.99.3]; K03941	PREDICTED: NADH dehydrogenase [ubiquinone] iron-sulfur protein 8, mitochondrial-like [Plutella xylostella]
LOC105388945	53.45	16.88	68.01	3.73	1.92	2.38	3.77766	0.000259182	NDUFB4; NADH dehydrogenase (ubiquinone) 1 beta subcomplex subunit 4; K03960	PREDICTED: uncharacterized protein LOC105388945 [Plutella xylostella]
LOC105387955	37.23	14.53	58.74	2.99	1.48	0.16	4.26095	0.00079228	NDUFS5; NADH dehydrogenase (ubiquinone) Fe-S protein 5; K03938	PREDICTED: NADH dehydrogenase [ubiquinone] iron-sulfur protein 5-like [Plutella xylostella]
LOC105381802	32.45	4.57	18.78	1.35	1.14	0.08	4.02007	0.0020668	NDUFS7; NADH dehydrogenase (ubiquinone) Fe-S protein 7 [EC:7.1.1.2 1.6.99.3]; K03940	PREDICTED: NADH-ubiquinone oxidoreductase 20 kDa subunit-like [Plutella xylostella]
LOC105380216	8.1	0.99	9.64	0.34	0	0.29	4.61541	0.00248565	NDUFS1; NADH dehydrogenase (ubiquinone) Fe-S protein 1 [EC:7.1.1.2 1.6.99.3]; K03934	PREDICTED: NADH-ubiquinone oxidoreductase 75 kDa subunit, mitochondrial-like [Plutella xylostella]
LOC105390313	31.52	2.61	17.29	0.53	1.15	2.03	3.38046	0.00579299	NDUFA12; NADH dehydrogenase (ubiquinone) 1 alpha subcomplex subunit 12; K11352	PREDICTED: probable NADH dehydrogenase [ubiquinone] 1 alpha subcomplex subunit 12 [Plutella xylostella]
LOC105392372	14.23	5.08	19.96	1.85	0.2	0	3.93826	0.0110302	NDUFV2; NADH dehydrogenase (ubiquinone) flavoprotein 2 [EC:7.1.1.2 1.6.99.3]; K03943	PREDICTED: probable NADH dehydrogenase [ubiquinone] flavoprotein 2, mitochondrial [Plutella xylostella]
LOC105395218	4.79	1.23	3.38	0.49	0.13	0.35	2.95609	0.0369458	NDUFA6; NADH dehydrogenase (ubiquinone) 1 alpha subcomplex subunit 6; K03950	PREDICTED: NADH dehydrogenase [ubiquinone] 1 alpha subcomplex subunit 6-like [Plutella xylostella]
LOC105384651	40.18	4.52	57.26	6.69	1.91	0.32	3.12923	0.0442574	NDUFB9; NADH dehydrogenase (ubiquinone) 1 beta subcomplex subunit 9; K03965	PREDICTED: NADH dehydrogenase [ubiquinone] 1 beta subcomplex subunit 9-like [Plutella xylostella]
LOC105394256	9.74	1.7	7.14	1.03	0.75	0	2.98141	0.0473901	NDUFS3; NADH dehydrogenase (ubiquinone) Fe-S protein 3 [EC:7.1.1.2 1.6.99.3]; K03936	PREDICTED: NADH dehydrogenase [ubiquinone] iron-sulfur protein 3, mitochondrial-like [Plutella xylostella]
LOC105390819	0.66	1.07	1.82	0	0	0.1	4.51116	0.00139088	NA	PREDICTED: glutamate receptor ionotropic, kainate 2-like [Plutella xylostella]
LOC105389206	0.63	5.41	2.88	0.29	0	0.08	4.44173	0.00753723	SERPINB; serpin B; K13963	PREDICTED: serpin B5-like [Plutella xylostella]
LOC105384299	3.67	0.54	1.9	0.17	0	0.04	4.73959	0.00390403	GALNT; polypeptide N-acetylgalactosaminyltransferase [EC:2.4.1.41]; K00710	PREDICTED: polypeptide N-acetylgalactosaminyltransferase 1-like [Plutella xylostella]
LOC105381129	16.96	3.32	14.56	1.34	0.18	0	4.12086	0.00612658	GALNT; polypeptide N-acetylgalactosaminyltransferase [EC:2.4.1.41]; K00710	PREDICTED: polypeptide N-acetylgalactosaminyltransferase 1-like [Plutella xylostella]
LOC105390613	2.88	0.54	1.79	0	0.05	0.11	4.21046	0.00793843	GALNT; polypeptide N-acetylgalactosaminyltransferase [EC:2.4.1.41]; K00710	PREDICTED: polypeptide N-acetylgalactosaminyltransferase 1-like [Plutella xylostella]
LOC105390602	0.68	0.2	0.77	0	0	0	6.17224	0.0107782	GALNT; polypeptide N-acetylgalactosaminyltransferase [EC:2.4.1.41]; K00710	PREDICTED: polypeptide N-acetylgalactosaminyltransferase 1-like [Plutella xylostella]
LOC105384292	8.95	0.36	3.4	0.42	0	0	4.8235	0.0273897	GALNT; polypeptide N-acetylgalactosaminyltransferase [EC:2.4.1.41]; K00710	PREDICTED: polypeptide N-acetylgalactosaminyltransferase 1-like [Plutella xylostella]
LOC105384295	2.12	0.2	1.29	0.09	0	0.11	3.79421	0.0345102	GALNT; polypeptide N-acetylgalactosaminyltransferase [EC:2.4.1.41]; K00710	PREDICTED: polypeptide N-acetylgalactosaminyltransferase 1-like [Plutella xylostella]
LOC105381436	1.85	0.82	2.97	0.08	0.13	0.07	3.91731	0.000933374	ABCC4; ATP-binding cassette, subfamily C (CFTR/MRP), member 4; K05673	PREDICTED: probable multidrug resistance-associated protein lethal(2)03659 [Plutella xylostella]
LOC105393506	32.67	9.45	51.61	2.04	1.21	1.21	4.07582	0.000113411	SLC17A5; MFS transporter, ACS family, solute carrier family 17 (sodium-dependent inorganic phosphate cotransporter), member 5; K12301	PREDICTED: putative inorganic phosphate cotransporter [Plutella xylostella]
LOC105388821	27.97	2.44	16.48	0.25	0.88	0.1	4.72845	0.000520803	SLC6A4, SERT; solute carrier family 6 (neurotransmitter transporter, serotonin) member 4; K05037	PREDICTED: uncharacterized protein LOC105388821 [Plutella xylostella]
LOC105383557	1.1	0.55	2.54	0	0.08	0	4.97895	0.000594968	NA	PREDICTED: sodium/hydrogen exchanger 10-like isoform X3 [Plutella xylostella]
LOC105390579	7.63	1.93	6.72	0.56	0.07	0	4.45986	0.00298036	SLC6A5_9, GLYT; solute carrier family 6 (neurotransmitter transporter, glycine) member 5/9; K05038	PREDICTED: sodium- and chloride-dependent neutral and basic amino acid transporter B(0+)-like [Plutella xylostella]
LOC105395131	2.61	0.26	3.35	0.11	0.07	0	4.85134	0.00305253	ATP1A; sodium/potassium-transporting ATPase subunit alpha [EC:7.2.2.13]; K01539	PREDICTED: sodium/potassium-transporting ATPase subunit alpha-2-like [Plutella xylostella]
LOC105398283	13.09	6.04	17.63	0.43	0.17	3.34	2.94006	0.0259255	NA	PREDICTED: LOW QUALITY PROTEIN: protein tipE [Plutella xylostella]
LOC105380165	1.68	4.07	0.87	0	0.15	0.33	3.21114	0.0352816	ATP1B, CD298; sodium/potassium-transporting ATPase subunit beta; K01540	PREDICTED: sodium/potassium-transporting ATPase subunit beta-2-like [Plutella xylostella]
LOC105388982	191.63	29.54	166.02	6.24	1.86	0.28	5.07007	0.00016343	NA	PREDICTED: snake venom serine proteinase 4a-like [Plutella xylostella]
LOC105394553	55.34	15.06	35.52	1.25	0.49	0.11	5.4796	3.29685e-06	DPP4, CD26; dipeptidyl-peptidase 4 [EC:3.4.14.5]; K01278	PREDICTED: spermine oxidase-like [Plutella xylostella]
			Down-regulated
Gene	BtC-DBM_1	BtC-DBM_2	BtC-DBM_3	Bt-DBM_1	Bt-DBM_2	Bt-DBM_3	logFC	FDR	KEGG	NR
LOC105383603	0.97	3.33	0	14.37	12.37	22.21	-3.83149	0.00154239	NA	PREDICTED: probable cytochrome P450 9f2 [Plutella xylostella]
LOC105386484	8.27	9.67	3.1	32.13	31.9	17.33	-2.37409	0.00539121	TBXAS1, CYP5A; thromboxane-A synthase [EC:5.3.99.5]; K01832	PREDICTED: cytochrome P450 6B6-like [Plutella xylostella]
LOC105389284	4.34	1.5	1.32	4.27	12.18	13.79	-2.43987	0.0108393	NA	PREDICTED: cytochrome P450 4C1-like [Plutella xylostella]
LOC105386477	5.33	4.89	1.91	15.39	20.86	6.2	-2.23067	0.0176932	TBXAS1, CYP5A; thromboxane-A synthase [EC:5.3.99.5]; K01832	PREDICTED: cytochrome P450 6k1-like [Plutella xylostella]
LOC105395717	3.25	5.97	0.38	5.38	13.03	27.8	-2.58019	0.0234108	NA	PREDICTED: probable cytochrome P450 6a13 [Plutella xylostella]
LOC105388622	1.12	1.24	0	1.79	7.15	4.24	-2.78723	0.0279924	NA	PREDICTED: cytochrome P450 6B5-like, partial [Plutella xylostella]
LOC105382823	47.05	81.2	13.22	23.66	282.06	353.58	-2.53426	0.0356886	NA	PREDICTED: cytochrome P450 6B7-like [Plutella xylostella]
LOC105396507	1.27	1.88	0	1.88	8.73	5.1	-2.63628	0.0443051	NA	PREDICTED: cytochrome P450 6B5-like [Plutella xylostella]
LOC105389539	39.38	9.15	7.08	119.38	37.72	41.99	-2.36841	0.0259255	GST, gst; glutathione S-transferase [EC:2.5.1.18]; K00799	PREDICTED: glutathione S-transferase 1-1-like [Plutella xylostella]
LOC105393145	1.47	3.98	0.61	2.36	36.73	42.71	-4.02079	0.00091349	ACHE; acetylcholinesterase [EC:3.1.1.7]; K01049	PREDICTED: acetylcholinesterase-like [Plutella xylostella]
LOC105398502	9.77	7.45	2.21	4.48	90.8	78.81	-3.50384	0.00273221	ACHE; acetylcholinesterase [EC:3.1.1.7]; K01049	PREDICTED: acetylcholinesterase-like [Plutella xylostella]
LOC105391968	1.75	0.98	0	0.94	18.18	11.91	-3.78925	0.00731473	ACHE; acetylcholinesterase [EC:3.1.1.7]; K01049	PREDICTED: cholinesterase-like, partial [Plutella xylostella]
LOC105389660	0.72	0.53	0	0.41	5.09	6.53	-3.49968	0.0123964	ACHE; acetylcholinesterase [EC:3.1.1.7]; K01049	PREDICTED: esterase FE4-like [Plutella xylostella]
LOC105389647	6.96	8.51	3.98	4.45	57.99	26.17	-2.51827	0.0177966	ACHE; acetylcholinesterase [EC:3.1.1.7]; K01049	PREDICTED: LOW QUALITY PROTEIN: esterase FE4-like [Plutella xylostella]
LOC105387913	11.31	10.72	2.91	12.3	74.76	248.94	-4.04239	0.000484775	CES1; carboxylesterase 1 [EC:3.1.1.1]; K01044	PREDICTED: juvenile hormone esterase-like, partial [Plutella xylostella]
LOC105390385	1.73	2.29	0.76	0.51	37.37	53.42	-4.52885	0.00109163	CES1; carboxylesterase 1 [EC:3.1.1.1]; K01044	PREDICTED: juvenile hormone esterase-like [Plutella xylostella]
LOC105382842	10.52	18.79	6.03	6.02	66.06	114.35	-2.67584	0.0190595	NA	PREDICTED: carboxylesterase 1C-like [Plutella xylostella]
LOC105396641	8.59	5.65	0.83	14.82	21.89	12.5	-2.12725	0.0451477	NA	PREDICTED: liver carboxylesterase-like [Plutella xylostella]
LOC105391590	10.02	5.83	2.07	31.81	316.12	341.93	-5.60814	1.70863e-06	NA	PREDICTED: trypsin, alkaline A-like isoform X2 [Plutella xylostella]
LOC105380166	8.57	2.84	3.46	2.11	29.63	52.71	-2.81527	0.0166721	ATPase subunit beta; K01540; ATP1B, CD298; sodium/potassium-transporting	PREDICTED: uncharacterized protein LOC105380166 [Plutella xylostella]
LOC105386077	180.08	180.92	83.46	583.9	3132.38	2959.5	-4.24079	8.42056e-06	PRSS1_2_3; trypsin [EC:3.4.21.4]; K01312	PREDICTED: trypsin, alkaline C-like [Plutella xylostella]
LOC105380870	0.29	0.83	0	2.04	10.75	35.04	-5.45176	8.82847e-05	PRSS1_2_3; trypsin [EC:3.4.21.4]; K01312	PREDICTED: trypsin, alkaline A-like [Plutella xylostella]
LOC105385640	0.39	0.1	0	0.91	13.32	6.45	-5.50235	0.000172286	PRSS1_2_3; trypsin [EC:3.4.21.4]; K01312	PREDICTED: trypsin, alkaline C-like [Plutella xylostella]
LOC105398265	0.29	0.58	0	2.39	5.76	18.02	-4.95123	0.000186302	PRSS1_2_3; trypsin [EC:3.4.21.4]; K01312	PREDICTED: trypsin CFT-1-like [Plutella xylostella]
LOC105391617	166.69	172.7	64.4	277.36	1838.94	1510.34	-3.50817	0.000259182	PRSS1_2_3; trypsin [EC:3.4.21.4]; K01312	PREDICTED: trypsin CFT-1-like isoform X1 [Plutella xylostella]
LOC105382175	1.47	0.6	0.61	4.53	6.92	25.59	-4.06206	0.000371711	PRSS1_2_3; trypsin [EC:3.4.21.4]; K01312	PREDICTED: trypsin CFT-1-like [Plutella xylostella]
LOC105383573	3.25	11.1	3.23	5.55	149.19	207.09	-4.61151	0.000375572	PRSS1_2_3; trypsin [EC:3.4.21.4]; K01312	PREDICTED: trypsin-like [Plutella xylostella]
LOC105386078	2.47	0.67	0.28	2.88	24.73	24.91	-4.24641	0.000404215	PRSS1_2_3; trypsin [EC:3.4.21.4]; K01312	PREDICTED: trypsin, alkaline B-like [Plutella xylostella]
LOC105386250	1.72	2.6	0.77	2.61	43.71	19.49	-4.00083	0.000452764	PRSS1_2_3; trypsin [EC:3.4.21.4]; K01312	PREDICTED: trypsin, alkaline C-like isoform X2 [Plutella xylostella]
LOC105392199	248.22	496.17	234.21	612.24	4521.5	3357.33	-3.41756	0.000452764	PRSS1_2_3; trypsin [EC:3.4.21.4]; K01312	PREDICTED: trypsin, alkaline B-like [Plutella xylostella]
LOC105391879	4.85	1.49	0.54	4.22	47.72	39.69	-4.08145	0.00051607	PRSS1_2_3; trypsin [EC:3.4.21.4]; K01312	PREDICTED: trypsin, alkaline B-like [Plutella xylostella]
LOC105390846	0.18	0.64	0.13	0.43	4.13	1.96	-3.00092	0.0289881	NA	PREDICTED: facilitated trehalose transporter Tret1-like [Plutella xylostella]
LOC105383363	14.13	9.24	10.87	19.24	30.05	39.98	-1.72069	0.0491396	NDUFA11; NADH dehydrogenase (ubiquinone) 1 alpha subcomplex subunit 11; K03956	PREDICTED: NADH dehydrogenase (ubiquinone) LOC105383363 [Plutella xylostella]
LOC105397921	15.46	17.95	7.16	27.35	41.36	30.4	-1.67409	0.0496867	NDUFV1; NADH dehydrogenase (ubiquinone) flavoprotein 1 [EC:7.1.1.2 1.6.99.3]; K03942	PREDICTED: NADH dehydrogenase [ubiquinone] flavoprotein 1, mitochondrial [Plutella xylostella]
LOC105392901	3.64	3.85	2.32	10.57	255.01	314.47	-6.14097	2.84017e-06	aminopeptidase N [EC:3.4.11.2]; K11140; ANPEP, CD13;	PREDICTED: membrane alanyl aminopeptidase-like [Plutella xylostella]
LOC105390989	2.65	1.72	2.27	3.39	55.86	178.83	-5.40122	3.86971e-05	aminopeptidase N [EC:3.4.11.2]; K11140; ANPEP, CD13;	PREDICTED: membrane alanyl aminopeptidase-like [Plutella xylostella]
LOC105386349	17.21	19.43	4.4	18.23	208.44	235.56	-3.82175	0.000582895	aminopeptidase N [EC:3.4.11.2]; K11140; ANPEP, CD13;	PREDICTED: membrane alanyl aminopeptidase-like [Plutella xylostella]
LOC105390988	14.57	18.81	5.35	11.26	206.64	244.52	-3.88575	0.000838445	aminopeptidase N [EC:3.4.11.2]; K11140; ANPEP, CD13;	PREDICTED: membrane alanyl aminopeptidase-like [Plutella xylostella]
LOC105386580	14.76	25.02	4.82	12.13	235.57	218.57	-3.70319	0.00196108	aminopeptidase N; ANPEP, CD13; [EC:3.4.11.2]; K11140	PREDICTED: aminopeptidase N [Plutella xylostella]
LOC105393000	23.41	36.01	13.82	28.03	220.91	233.49	-3.02465	0.00240573	aminopeptidase N; ANPEP, CD13; [EC:3.4.11.2]; K11140	PREDICTED: membrane alanyl aminopeptidase-like [Plutella xylostella]
LOC105390997	58.11	83.15	5.59	41.96	872.06	568.83	-3.69167	0.00543313	aminopeptidase N ; ANPEP, CD13; [EC:3.4.11.2]; K11140	PREDICTED: membrane alanyl aminopeptidase-like [Plutella xylostella]
LOC105390996	3.83	4.75	2.02	8.6	36.47	7.45	-2.6843	0.00546496	aminopeptidase N [EC:3.4.11.2]; K11140;ANPEP, CD13;	PREDICTED: aminopeptidase N-like [Plutella xylostella]
LOC105386579	10.25	18.9	7.32	6.99	125.23	125.19	-3.10746	0.00616025	aminopeptidase N [EC:3.4.11.2]; K11140; ANPEP, CD13;	PREDICTED: aminopeptidase N-like [Plutella xylostella]
LOC105386254	80.56	168.2	25.74	76.07	1006.8	910.97	-3.18111	0.00710396	aminopeptidase N [EC:3.4.11.2]; K11140; ANPEP, CD13;	PREDICTED: membrane alanyl aminopeptidase-like [Plutella xylostella]
LOC105398335	2.47	1.42	0.99	0.3	9.61	13.2	-2.54898	0.0483893	NA	PREDICTED: DE-cadherin-like [Plutella xylostella]
LOC105396404	1.82	1.14	0.49	1.23	6.92	5.47	-2.31909	0.0350222	GALNT; polypeptide N-acetylgalactosaminyltransferase [EC:2.4.1.41]; K00710	PREDICTED: polypeptide N-acetylgalactosaminyltransferase 5-like isoform X2 [Plutella xylostella]
LOC105382849	0.9	1.43	0.27	0.94	5.81	7.57	-2.75087	0.0129262	ABCC10; ATP-binding cassette, subfamily C (CFTR/MRP), member 10; K05674	PREDICTED: multidrug resistance-associated protein 7-like [Plutella xylostella]
LOC105389450	0	0	0	0.37	2.76	4.89	-8.66042	2.93515e-05	UGT; glucuronosyltransferase [EC:2.4.1.17]; K00699	PREDICTED: UDP-glucuronosyltransferase 2B18-like isoform X2 [Plutella xylostella]
LOC105388506	0	0	0.13	0.09	3	5.43	-6.62727	0.000889065	UGT; glucuronosyltransferase [EC:2.4.1.17]; K00699	PREDICTED: UDP-glucuronosyltransferase 2B18-like [Plutella xylostella]
LOC105397335	1.1	4.81	0.61	3.48	26.43	48.23	-3.8268	0.00154391	UGT; glucuronosyltransferase [EC:2.4.1.17]; K00699	PREDICTED: UDP-glucuronosyltransferase 2B15-like [Plutella xylostella]
LOC105383409	1.86	1.91	1.13	1.33	18.34	11.75	-2.99163	0.00529035	UGT; glucuronosyltransferase [EC:2.4.1.17]; K00699	PREDICTED: UDP-glucuronosyltransferase 2B15-like [Plutella xylostella]
LOC105382131	20.09	29.81	32.63	59.54	121.96	125.57	-2.18821	0.00751635	UGT; glucuronosyltransferase [EC:2.4.1.17]; K00699	PREDICTED: UDP-glucuronosyltransferase 2B7-like isoform X2 [Plutella xylostella]
LOC105380066	4.75	5.83	2.61	2.8	20.73	29.69	-2.30243	0.0281589	UGT; glucuronosyltransferase [EC:2.4.1.17]; K00699	PREDICTED: UDP-glucuronosyltransferase 2B1-like [Plutella xylostella]
LOC105392445	28.67	27.67	10.66	29.64	271.46	197.28	-3.23721	0.00114668	SLC6A5_9, GLYT; solute carrier family 6 (neurotransmitter transporter, glycine) member 5/9; K05038	PREDICTED: sodium-dependent nutrient amino acid transporter 1-like [Plutella xylostella]
LOC105380184	2.11	2.8	1.57	2.42	19.68	14.67	-2.80737	0.00450535	SLC4A2, AE2; solute carrier family 4 (anion exchanger), member 2; K13855	PREDICTED: anion exchange protein 2-like [Plutella xylostella]
LOC105383412	0.28	0.72	0.43	0.96	9.01	3.14	-3.48871	0.00532293	NA	PREDICTED: pickpocket protein 28-like [Plutella xylostella]
LOC105384135	0.12	0.29	0.12	0	3.93	4.25	-4.12281	0.0175765	NA	PREDICTED: sodium-dependent nutrient amino acid transporter 1-like [Plutella xylostella]
LOC105392444	5.86	8.39	1.08	1.58	48.85	60.57	-3.17016	0.0183806	SLC6A5_9, GLYT; solute carrier family 6 (neurotransmitter transporter, glycine) member 5/9; K05038	PREDICTED: sodium-dependent nutrient amino acid transporter 1-like [Plutella xylostella]
LOC105396281	153.79	164.55	77.93	146.93	966.34	427.58	-2.31268	0.0158732	DBI, ACBP; diazepam-binding inhibitor (GABA receptor modulator, acyl-CoA-binding protein); K08762	PREDICTED: putative acyl-CoA-binding protein [Plutella xylostella]
LOC105397185	17.52	14.19	1.07	29.53	55.56	39.13	-2.29619	0.0409676	DBI, ACBP; diazepam-binding inhibitor (GABA receptor modulator, acyl-CoA-binding protein); K08762	PREDICTED: acyl-CoA-binding protein homolog [Plutella xylostella]
LOC105398438	51.72	67.17	18.1	97.3	514.97	281.66	-3.06782	0.00120688	katE, CAT, catB, srpA; catalase [EC:1.11.1.6]; K03781	PREDICTED: catalase-like [Plutella xylostella]
LOC105390515	145.59	113.58	57.96	135.02	697.38	299.68	-2.21199	0.0194248	katE, CAT, catB, srpA; catalase [EC:1.11.1.6]; K03781	PREDICTED: catalase-like [Plutella xylostella]
LOC105391710	3.27	3.63	1.86	1.7	15.18	21.56	-2.42436	0.0206834	ABCC1; ATP-binding cassette, subfamily C (CFTR/MRP), member 1 [EC:7.6.2.3]; K05665	PREDICTED: multidrug resistance-associated protein 1 isoform X4 [Plutella xylostella]
LOC105387880	1.94	2.9	0.26	1.41	10.28	13.6	-2.62012	0.0300419	ABCC4; ATP-binding cassette, subfamily C (CFTR/MRP), member 4; K05673	PREDICTED: multidrug resistance-associated protein 4-like [Plutella xylostella]
LOC105381408	0.29	0	0	0.27	1.87	3.15	-4.29739	0.0132474	E3.2.1.14; chitinase [EC:3.2.1.14]; K01183	PREDICTED: chitotriosidase-1-like [Plutella xylostella]
LOC105381987	346.6	464.45	433.52	818.66	705.06	733.77	-1.59422	0.00388143	ATPeF0O, ATP5O, ATP5; F-type H+-transporting ATPase subunit O; K02137	PREDICTED: ATP synthase subunit O, mitochondrial [Plutella xylostella]
LOC105385286	332.32	384.65	374.44	579.8	646.33	624.49	-1.4916	0.00582561	ATPeF0D, ATP5H, ATP7; F-type H+-transporting ATPase subunit d; K02138	PREDICTED: ATP synthase subunit d, mitochondrial [Plutella xylostella]

## Sheet: BtC vs FOH
Table S3 The differentially expressed genes between Bt and chlorantraniliprole-resistant (BtC-DBM) and field high resistant strain (FOH-DBM) of Plutelle xylostella
			BtC-DBM vs FOH-DBM
			Up-regulated
Gene	BtC-DBM_1	BtC-DBM_2	BtC-DBM_3	FOH-DBM_1	FOH-DBM_2	FOH-DBM_3	logFC	FDR	KEGG	NR
LOC105382179	59.03	12.6	20.56	0.13	0.09	0.21	6.92968	4.40812e-11	NA	PREDICTED: cytochrome P450 6B1-like [Plutella xylostella]
LOC105397997	6.31	32.24	14.04	0.53	0.06	0.16	5.53103	3.71021e-07	NA	PREDICTED: cytochrome P450 4g15 [Plutella xylostella]
LOC105398192	30.62	19.71	27.84	3.36	1.22	2.69	2.78314	0.000151435	NA	PREDICTED: cytochrome P450 301a1, mitochondrial [Plutella xylostella]
LOC105398353	0.87	1.82	1.79	0	0	0	6.94834	0.000255942	NA	PREDICTED: cytochrome P450 4C1-like [Plutella xylostella]
LOC105391963	0.5	8.43	2.56	0	0	0	6.84287	0.00295162	NA	PREDICTED: cytochrome P450 9e2-like [Plutella xylostella]
LOC105398661	0.98	9.99	2.18	0.12	0.25	0.2	3.82653	0.00348547	NA	PREDICTED: cytochrome P450 6a14 [Plutella xylostella]
LOC105391956	0.57	10.74	1.98	0.11	0.31	0.15	3.84378	0.00645953	NA	PREDICTED: cytochrome P450 6a2-like [Plutella xylostella]
LOC105380465	6.71	8.06	3.64	1.14	0.26	1.08	2.26194	0.00651829	NA	PREDICTED: cytochrome P450 6B6-like [Plutella xylostella]
LOC105395119	1.42	3.3	0.59	0	0.11	0.11	3.80803	0.0120848	SAD, CYP315A1; ecdysteroid 2-hydroxylase; K10722	PREDICTED: cytochrome P450 315a1, mitochondrial-like isoform X2 [Plutella xylostella]
LOC105387501	3.03	2.99	3.52	0.96	0.09	0.34	2.14852	0.0280381	SAD, CYP315A1; ecdysteroid 2-hydroxylase; K10722	PREDICTED: cytochrome P450 315a1, mitochondrial-like isoform X2 [Plutella xylostella]
LOC105381026	7.67	2.42	1.76	0	0.29	0.84	2.61722	0.0280565	NA	PREDICTED: cytochrome P450 4V2-like [Plutella xylostella]
LOC105392138	53.68	12.9	82.87	0	0	8.36	3.7007	0.018132	GST, gst; glutathione S-transferase [EC:2.5.1.18]; K00799	PREDICTED: glutathione S-transferase 1-like [Plutella xylostella]
LOC105389468	3.48	2.64	6.74	0.13	0.26	0.38	3.36971	0.0011298	NA	PREDICTED: acetylcholinesterase [Plutella xylostella]
LOC105398756	37.74	16.47	10.44	4.16	0.9	1.79	2.55365	0.00249738	ACHE; acetylcholinesterase [EC:3.1.1.7]; K01049	PREDICTED: acetylcholinesterase [EC:3.1.1.7]; K01049 isoform X1 [Plutella xylostella]
LOC105392147	5.15	1.92	2.1	0.09	0.08	0.06	4.58875	1.52875e-05	carboxylesterase 1 ; CES1; [EC:3.1.1.1]; K01044; NLGN; neuroligin; K07378	PREDICTED: neuroligin-4, Y-linked-like [Plutella xylostella]
LOC105387899	20.24	19.25	15.21	2.12	2.17	4.17	2.00719	0.00522469	carboxylesterase 1; CES1; [EC:3.1.1.1]; K01044	PREDICTED: juvenile hormone esterase-like [Plutella xylostella]
LOC105386120	36.62	8.73	44.16	0	0	1.69	4.99011	7.63652e-05	ATPeFG, ATP5L, ATP20; F-type H+-transporting ATPase subunit g; K02140	PREDICTED: ATP synthase subunit g, mitochondrial-like [Plutella xylostella]
LOC105382346	10.6	5.24	16.35	0.31	0	3.01	2.70103	0.0255786	ATPeF0D, ATP5H, ATP7; F-type H+-transporting ATPase subunit d; K02138	PREDICTED: ATP synthase subunit d, mitochondrial-like [Plutella xylostella]
LOC105384397	25.35	12	10.64	0	0	0.07	7.93526	3.53734e-10	NA	PREDICTED: trypsin-1-like [Plutella xylostella]
LOC105386029	25.79	17.21	29.8	0.5	0	0.07	6.30417	3.34031e-09	NA	PREDICTED: trypsin-1-like [Plutella xylostella]
LOC105392860	12.8	9.23	28.78	0.12	0	0.48	5.57794	7.8067e-07	PRSS1_2_3; trypsin [EC:3.4.21.4]; K01312	PREDICTED: trypsin CFT-1-like [Plutella xylostella]
LOC105384400	14.11	9.58	8.41	0.72	0	0	4.78594	3.23922e-05	NA	PREDICTED: trypsin-1-like [Plutella xylostella]
LOC105384556	22.4	8.43	5.07	0.64	0	0	5.07498	4.94103e-05	NA	PREDICTED: trypsin-1-like [Plutella xylostella]
LOC105393240	14.77	2.86	5.65	0.28	0	0.19	4.75951	9.10379e-05	PRSS1_2_3; trypsin [EC:3.4.21.4]; K01312	PREDICTED: trypsin CFT-1-like [Plutella xylostella]
LOC105391571	9.31	14.4	14.77	0	0.43	1.19	3.87456	0.000255942	PRSS1_2_3; trypsin [EC:3.4.21.4]; K01312	PREDICTED: trypsin CFT-1-like [Plutella xylostella]
LOC105392862	4.51	4.61	2.22	0	0.26	0.37	3.40506	0.00252537	PRSS1_2_3; trypsin [EC:3.4.21.4]; K01312	PREDICTED: trypsin CFT-1-like isoform X2 [Plutella xylostella]
LOC105380753	13	4.32	2.07	0.29	0	0.39	3.86927	0.00318766	PRSS1_2_3; trypsin [EC:3.4.21.4]; K01312	PREDICTED: trypsin-like [Plutella xylostella]
LOC105381834	0.51	1.44	4.72	0	0	0.07	5.13023	0.00459981	PRSS1_2_3; trypsin [EC:3.4.21.4]; K01312	PREDICTED: trypsin, alkaline B-like [Plutella xylostella]
LOC105392566	1.24	0.67	4.55	0	0	0.08	4.92599	0.00551635	PRSS1_2_3; trypsin [EC:3.4.21.4]; K01312	PREDICTED: trypsin CFT-1-like [Plutella xylostella]
LOC105391645	1.94	3.14	4.29	0.48	0	0.16	3.16838	0.00659337	PRSS1_2_3; trypsin [EC:3.4.21.4]; K01312	PREDICTED: trypsin CFT-1-like [Plutella xylostella]
LOC105397429	5.17	0.6	3.05	0	0	0.43	3.44633	0.0142861	PRSS1_2_3; trypsin [EC:3.4.21.4]; K01312	PREDICTED: trypsin, alkaline B-like [Plutella xylostella]
LOC105397427	5.27	1.66	7.94	0.31	0.43	1.39	2.13808	0.0386191	PRSS1_2_3; trypsin [EC:3.4.21.4]; K01312	PREDICTED: trypsin, alkaline B-like [Plutella xylostella]
LOC105396708	2.87	0.58	1.24	0	0.14	0.21	2.87375	0.0396463	PRSS1_2_3; trypsin [EC:3.4.21.4]; K01312	PREDICTED: trypsin-like [Plutella xylostella]
LOC105390678	0.9	2.45	2.09	0	0	0.52	2.61167	0.0416202	PRSS1_2_3; trypsin [EC:3.4.21.4]; K01312	PREDICTED: trypsin CFT-1-like [Plutella xylostella]
LOC105382752	4.18	4.77	4.49	0.27	0.56	1.25	1.98599	0.043949	PRSS1_2_3; trypsin [EC:3.4.21.4]; K01312	PREDICTED: trypsin-1-like [Plutella xylostella]
LOC105398275	49.69	35.6	69.34	5.49	3.75	8.07	2.52578	0.0010391	NA	PREDICTED: facilitated trehalose transporter Tret1-like [Plutella xylostella]
LOC105381802	32.45	4.57	18.78	1.19	0.16	1.91	3.42976	0.000904436	NADH dehydrogenase (ubiquinone) ; NDUFS7; Fe-S protein 7 [EC:7.1.1.2 1.6.99.3]; K03940	PREDICTED: NADH-ubiquinone oxidoreductase 20 kDa subunit-like [Plutella xylostella]
LOC105384651	40.18	4.52	57.26	0	0	7.38	3.29649	0.0379039	NADH dehydrogenase (ubiquinone); NDUFB9; 1 beta subcomplex subunit 9; K03965	PREDICTED: NADH dehydrogenase [ubiquinone] 1 beta subcomplex subunit 9-like [Plutella xylostella]
LOC105392450	17.85	50.81	31.89	10.14	4.42	6.68	1.61993	0.0447137	NADH dehydrogenase (ubiquinone);HEY; hairy and enhancer of split related with YRPW motif; K09091; NDUFB7; 1 beta subcomplex subunit 7; K03963	PREDICTED: hairy/enhancer-of-split related with YRPW motif protein isoform X2 [Plutella xylostella]
LOC105395755	1.32	0.66	0.56	0	0	0.02	5.35011	0.000265838	NA	PREDICTED: glutamate receptor ionotropic, kainate 2-like [Plutella xylostella]
LOC105392273	2.83	2.43	1.77	0.07	0.1	0.15	3.66049	0.000880447	NA	PREDICTED: glutamate receptor 1-like, partial [Plutella xylostella]
LOC105397682	4.24	6.18	3.57	1.05	0.11	0.46	2.5072	0.00614749	NA	PREDICTED: glutamate receptor ionotropic, kainate 2-like, partial [Plutella xylostella]
LOC105390927	2.26	2.17	2.27	0	0.16	0.51	2.56796	0.0170351	NA	PREDICTED: glutamate receptor ionotropic, delta-1 [Plutella xylostella]
LOC105386289	0.51	0.63	0.07	0	0	0.06	3.34443	0.0221771	NA	PREDICTED: glutamate receptor ionotropic, kainate 2-like [Plutella xylostella]
LOC105395754	1.86	2.85	1.52	0.51	0.12	0.28	2.13479	0.0244837	NA	PREDICTED: glutamate receptor ionotropic, kainate 2-like, partial [Plutella xylostella]
LOC105387001	320.16	282.45	171.48	21.81	6.37	14.84	3.53159	1.25874e-05	SERPINB; serpin B; K13963	PREDICTED: serpin B3-like [Plutella xylostella]
LOC105383392	127.05	68.72	107.27	10.45	6.14	15.96	2.57831	0.000731185	NA	PREDICTED: serpin B13 isoform X2 [Plutella xylostella]
LOC105390554	3.8	5.25	3.5	0.12	0.34	0.57	2.89868	0.00251043	SERPINB; serpin B; K13963	PREDICTED: serpin B8-like [Plutella xylostella]
LOC105383415	67.1	47.29	28.26	12.07	6.04	10.66	1.61519	0.030864	SERPINB; K13963	PREDICTED: serpin B protein LOC105383415 [Plutella xylostella]
LOC105389585	9.42	3.27	6.01	0.79	0.58	1.93	1.83225	0.0283849	CARP, pepA; leucyl aminopeptidase [EC:3.4.11.1]; K01255; LAP3; cytosol aminopeptidase [EC:3.4.11.1 3.4.11.5]; K11142	PREDICTED: cytosol aminopeptidase-like [Plutella xylostella]
LOC105397777	7.95	2.23	2.53	0.53	0	0.88	2.33424	0.0489898	CARP, pepA; leucyl aminopeptidase [EC:3.4.11.1]; K01255; LAP3; cytosol aminopeptidase [EC:3.4.11.1 3.4.11.5]; K11142	PREDICTED: cytosol aminopeptidase-like, partial [Plutella xylostella]
LOC105382108	8.62	2.88	3.72	0.58	0.05	0.25	3.46119	0.00021877	NA	PREDICTED: cadherin-23 [Plutella xylostella]
LOC105389983	3.04	3.5	2.81	0.72	0.2	0.29	2.30743	0.00280205	FAT4; protocadherin Fat 4; K16669	PREDICTED: cadherin-related tumor suppressor [Plutella xylostella]
LOC105381408	0.29	0	0	0.27	1.87	3.15	-4.29739	0.0132474	chitinase [EC:3.2.1.14]; K01183; E3.2.1.14;	PREDICTED: chitotriosidase-1-like [Plutella xylostella]
LOC105389028	121.43	17.55	59.09	2.5	1.06	3.37	4.163	8.94389e-06	chitinase [EC:3.2.1.14]; K01183; E3.2.1.14;	PREDICTED: endochitinase [Plutella xylostella]
LOC105385326	45.36	54.09	40.93	3.27	1.99	3.64	3.3187	1.23397e-05	chitinase [EC:3.2.1.14]; K01183; E3.2.1.14;	PREDICTED: probable chitinase 3 [Plutella xylostella]
LOC105383909	113.32	102.27	45.33	1.42	3.67	5.98	3.80424	2.03973e-05	chitinase [EC:3.2.1.14]; K01183; E3.2.1.14;	PREDICTED: probable chitinase 2 [Plutella xylostella]
LOC105392303	72.9	45.22	26.68	2.03	2.42	6.28	3.05327	0.000142341	chitinase [EC:3.2.1.14]; K01183; E3.2.1.14;	PREDICTED: probable endochitinase [Plutella xylostella]
LOC105390728	1.85	5.05	2.29	0.52	0.18	0.64	2.20253	0.00635507	chitinase [EC:3.2.1.14]; K01183; E3.2.1.14;	PREDICTED: mucin-5AC isoform X2 [Plutella xylostella]
LOC105388782	2.87	1.27	2.97	0.07	0.21	0.22	2.97568	0.00405492	ATPeF1G, ATP5C1, ATP3; F-type H+-transporting ATPase subunit gamma; K02136	PREDICTED: ATP synthase subunit gamma, mitochondrial-like [Plutella xylostella]
LOC105395733	3.32	1.53	3.27	0	0.68	0.09	2.68055	0.0191426	ATPeF0O, ATP5O, ATP5; F-type H+-transporting ATPase subunit O; K02137	PREDICTED: ATP synthase subunit O, mitochondrial-like [Plutella xylostella]
LOC105381436	1.85	0.82	2.97	0.05	0.04	0.14	3.90635	0.000211841	ABCC4; ATP-binding cassette, subfamily C (CFTR/MRP), member 4; K05673	PREDICTED: probable multidrug resistance-associated protein lethal(2)03659 [Plutella xylostella]
LOC105384264	3.39	0.59	5.26	0	0	0.63	3.10476	0.0336064	GALNT; polypeptide N-acetylgalactosaminyltransferase [EC:2.4.1.41]; K00710	PREDICTED: N-acetylgalactosaminyltransferase 1-like isoform X3 [Plutella xylostella]
LOC105384743	1.02	1.24	1.28	0.22	0.09	0.29	1.88502	0.0351967	ATP1A; sodium/potassium-transporting ATPase subunit alpha [EC:7.2.2.13]; K01539	PREDICTED: sodium/potassium-transporting ATPase subunit alpha-B-like [Plutella xylostella]
LOC105390459	1.52	3.55	2.41	0.23	0	0.21	3.35551	0.00306125	NA	PREDICTED: gustatory receptor for sugar taste 64a-like [Plutella xylostella]
LOC105389050	2.52	6.33	9.04	0.31	0.11	0.38	3.88075	5.48226e-05	NA	PREDICTED: serine proteinase stubble [Plutella xylostella]
LOC105387636	9.46	1.7	4.14	0.09	0.18	0.26	4.07009	0.000125154	NA	PREDICTED: serine proteinase stubble-like [Plutella xylostella]
LOC105387637	5.19	0.97	1.9	0.14	0	0.07	4.47689	0.00013433	NA	PREDICTED: serine proteinase stubble-like [Plutella xylostella]
LOC105393254	1.52	12.5	13.52	1.07	0	0.55	3.56478	0.00428523	NA	PREDICTED: serine proteinase stubble-like, partial [Plutella xylostella]
LOC105391835	22.9	4.89	7.07	2.24	0.74	0.66	2.50541	0.00555949	NA	PREDICTED: serine proteinase stubble-like [Plutella xylostella]
LOC105380657	35.47	7.77	8.51	0	0	0.91	4.90901	7.37524e-05	E3.1.3.1, phoA, phoB; alkaline phosphatase [EC:3.1.3.1]; K01077	PREDICTED: alkaline phosphatase, tissue-nonspecific isozyme-like [Plutella xylostella]
LOC105398431	2.67	3.91	13.1	0	0	0.19	5.54478	8.87038e-05	E3.1.3.1, phoA, phoB; alkaline phosphatase [EC:3.1.3.1]; K01077	PREDICTED: alkaline phosphatase-like [Plutella xylostella]
LOC105398673	2.71	1.07	1.36	0	0.04	0.04	5.05553	0.000475319	NA	PREDICTED: beta-1,4-N-acetylgalactosaminyltransferase bre-4 [Plutella xylostella]
LOC105384268	13.75	2.39	13.65	0	0	0	9.19262	3.34867e-06	GALNT; polypeptide N-acetylgalactosaminyltransferase [EC:2.4.1.41]; K00710	PREDICTED: polypeptide N-acetylgalactosaminyltransferase 1-like isoform X2 [Plutella xylostella]
LOC105398673	2.71	1.07	1.36	0	0.04	0.04	5.05553	0.000475319	NA	PREDICTED: beta-1,4-N-acetylgalactosaminyltransferase bre-4 [Plutella xylostella]
LOC105384264	3.39	0.59	5.26	0	0.13	0	5.23165	0.00196755	GALNT; polypeptide N-acetylgalactosaminyltransferase [EC:2.4.1.41]; K00710	PREDICTED: polypeptide N-acetylgalactosaminyltransferase 1-like isoform X3 [Plutella xylostella]
			Down-regulated
Gene	BtC-DBM_1	BtC-DBM_2	BtC-DBM_3	FOH-DBM_1	FOH-DBM_2	FOH-DBM_3	logFC	FDR	KEGG	NR
LOC105381077	0	0.33	0.14	13.6	3	2.54	-5.81294	2.90922e-06	NA	PREDICTED: cytochrome P450 4c21-like [Plutella xylostella]
LOC105386477	5.33	4.89	1.91	6.39	155.14	66.14	-5.23127	5.17639e-05	TBXAS1, CYP5A; thromboxane-A synthase [EC:5.3.99.5]; K01832	PREDICTED: cytochrome P450 6k1-like [Plutella xylostella]
LOC105386484	8.27	9.67	3.1	9.51	246.36	143.45	-5.1996	6.1214e-05	TBXAS1, CYP5A; thromboxane-A synthase [EC:5.3.99.5]; K01832	PREDICTED: cytochrome P450 6B6-like [Plutella xylostella]
LOC105395328	2.1	2.99	2.89	3.33	54.7	39.51	-4.48075	0.000119199	TBXAS1, CYP5A; thromboxane-A synthase [EC:5.3.99.5]; K01832	PREDICTED: cytochrome P450 6B6-like [Plutella xylostella]
LOC105386467	0.82	1.45	0.46	0.39	20.19	46.12	-5.25443	0.000228052	TBXAS1, CYP5A; thromboxane-A synthase [EC:5.3.99.5]; K01832	PREDICTED: cytochrome P450 6B6-like [Plutella xylostella]
LOC105382422	4.01	6.21	2.2	7.65	27.61	25.79	-3.11127	0.000667157	PHM, CYP306A1; ecdysteroid 25-hydroxylase; K10720	PREDICTED: cytochrome P450 306a1 [Plutella xylostella]
LOC105386494	9.49	12.52	5.61	12.2	154.6	38.19	-3.92709	0.000871937	TBXAS1, CYP5A; thromboxane-A synthase [EC:5.3.99.5]; K01832	PREDICTED: cytochrome P450 6B6-like [Plutella xylostella]
LOC105387005	14.22	14.21	8.86	16.88	91.99	49.28	-3.01058	0.0017452	TBXAS1, CYP5A; thromboxane-A synthase [EC:5.3.99.5]; K01832	PREDICTED: cytochrome P450 6B6-like [Plutella xylostella]
LOC105392345	4.76	5.02	0.6	2.99	20.71	31.64	-3.1919	0.00387022	TBXAS1, CYP5A; thromboxane-A synthase [EC:5.3.99.5]; K01832	PREDICTED: cytochrome P450 6B5-like [Plutella xylostella]
LOC105389269	16.87	10.82	8.41	65.42	167.24	133.78	-4.20431	2.96897e-06	GST, gst; glutathione S-transferase [EC:2.5.1.18]; K00799	PREDICTED:glutathione S-transferase [EC:2.5.1.18]; K00799;LOC105389269 [Plutella xylostella]
LOC105380707	32.82	63.61	37.42	143.78	131.53	130.55	-2.32342	0.00319361	GST, gst; glutathione S-transferase [EC:2.5.1.18]; K00799	PREDICTED: glutathione S-transferase 1-1-like [Plutella xylostella]
LOC105394254	5.55	6.53	1.95	10.23	14.04	19.47	-2.36489	0.00319361	GST, gst; glutathione S-transferase [EC:2.5.1.18]; K00799	PREDICTED: glutathione S-transferase theta-2-like [Plutella xylostella]
LOC105392478	41.03	41.82	16.62	43.81	129.88	112.63	-2.37338	0.00657537	GST, gst; glutathione S-transferase [EC:2.5.1.18]; K00799	PREDICTED: glutathione S-transferase 1-like [Plutella xylostella]
LOC105395140	406.35	383.52	441.1	1125.01	1480.1	707.41	-2.25827	0.00681185	GST, gst; glutathione S-transferase [EC:2.5.1.18]; K00799	PREDICTED: glutathione S-transferase 1-like [Plutella xylostella]
LOC105386021	89.55	101.97	55.97	137.99	330.36	180.65	-2.27217	0.00802822	GST, gst; glutathione S-transferase [EC:2.5.1.18]; K00799	PREDICTED: glutathione S-transferase 1-like [Plutella xylostella]
LOC105395132	27.96	43.31	42.3	88.62	79.27	88.03	-1.87535	0.0140671	GST, gst; glutathione S-transferase [EC:2.5.1.18]; K00799	PREDICTED: glutathione S-transferase 1-like [Plutella xylostella]
LOC105391501	6.32	2.19	0.93	9.5	7.03	8	-2.12519	0.017425	GST, gst; glutathione S-transferase [EC:2.5.1.18]; K00799; SE; pyrimidodiazepine synthase [EC:1.5.4.1]; K00310	PREDICTED: glutathione S-transferase;pyrimidodiazepine synthase-like [Plutella xylostella]
LOC105391652	744.23	581.21	712.14	1164.04	1856.31	1229.34	-1.88506	0.0205343	HPGDS; prostaglandin-H2 D-isomerase / glutathione transferase [EC:5.3.99.2 2.5.1.18]; K04097	PREDICTED: glutathione S-transferase 2-like [Plutella xylostella]
LOC105383753	9.22	11.29	6.75	12.45	16.16	26.5	-1.71489	0.0205393	GST, gst; glutathione S-transferase [EC:2.5.1.18]; K00799	PREDICTED: glutathione S-transferase theta-2-like [Plutella xylostella]
LOC105393992	16.45	16.11	4.32	19.23	15.59	38.23	-1.654	0.0370109	GST, gst; glutathione S-transferase [EC:2.5.1.18]; K00799; SE; pyrimidodiazepine synthase [EC:1.5.4.1]; K00310	PREDICTED: glutathione S-transferase [EC:2.5.1.18]: pyrimidodiazepine synthase-like [Plutella xylostella]
LOC105389647	6.96	8.51	3.98	19.98	215.77	126.71	-5.14547	8.60444e-06	ACHE; acetylcholinesterase [EC:3.1.1.7]; K01049	PREDICTED: acetylcholinesterase [EC:3.1.1.7]: esterase FE4-like [Plutella xylostella]
LOC105389660	0.72	0.53	0	1.19	13.45	17.96	-5.40552	3.34927e-05	ACHE; acetylcholinesterase [EC:3.1.1.7]; K01049	PREDICTED: acetylcholinesterase [EC:3.1.1.7];esterase FE4-like [Plutella xylostella]
LOC105391968	1.75	0.98	0	2.57	44.07	31.07	-5.685	3.42245e-05	ACHE; acetylcholinesterase [EC:3.1.1.7]; K01049	PREDICTED: acetylcholinesterase [EC:3.1.1.7];cholinesterase-like, partial [Plutella xylostella]
LOC105398502	9.77	7.45	2.21	4.81	159.53	75.51	-4.63739	0.000445502	ACHE; acetylcholinesterase [EC:3.1.1.7]; K01049	PREDICTED: acetylcholinesterase-like [Plutella xylostella]
LOC105393145	1.47	3.98	0.61	0.38	37.75	25.16	-4.27233	0.00342317	ACHE; acetylcholinesterase [EC:3.1.1.7]; K01049	PREDICTED: acetylcholinesterase-like [Plutella xylostella]
LOC105391967	9.2	7.02	0.73	3.83	95.17	25.56	-3.94866	0.00348314	ACHE; acetylcholinesterase [EC:3.1.1.7]; K01049	PREDICTED: acetylcholinesterase [EC:3.1.1.7]; bile salt-activated lipase-like, partial [Plutella xylostella]
LOC105381931	5.4	9.59	4.85	10.25	18	22.63	-2.09148	0.00783352	NA	PREDICTED: acetylcholinesterase-like [Plutella xylostella]
LOC105390291	3.48	7.16	4	3.92	33.93	7.82	-2.63922	0.0163162	ACHE; acetylcholinesterase [EC:3.1.1.7]; K01049; CES1; carboxylesterase 1 [EC:3.1.1.1]; K01044	PREDICTED: acetylcholinesterase; esterase FE4-like [Plutella xylostella]
LOC105392411	1.32	2.38	0.36	1.86	2.94	6.26	-2.09699	0.0245756	NA	PREDICTED: acetylcholinesterase-like [Plutella xylostella]
LOC105383901	0.85	1.19	0.1	6.79	0.62	1.26	-2.5721	0.0249625	ACHE; acetylcholinesterase [EC:3.1.1.7]; K01049	PREDICTED: acetylcholinesterase-like [Plutella xylostella]
LOC105397411	1.48	4.9	0.44	0.37	15.77	10.45	-2.84252	0.0372951	ACHE; acetylcholinesterase [EC:3.1.1.7]; K01049	PREDICTED: acetylcholinesterase [EC:3.1.1.7];carboxylesterase 5A-like [Plutella xylostella]
LOC105390205	1.44	2.18	0.55	1.84	2.18	4.56	-1.69478	0.046153	NA	PREDICTED: acetylcholinesterase-like isoform X4 [Plutella xylostella]
LOC105397896	22.14	3.62	5.03	48.37	307.54	549.4	-5.6978	3.76182e-06	CES1; carboxylesterase 1 [EC:3.1.1.1]; K01044	PREDICTED: carboxylesterase 1 [EC:3.1.1.1]; juvenile hormone esterase-like [Plutella xylostella]
LOC105390385	1.73	2.29	0.76	0.54	41.5	21.96	-4.69471	0.000810238	CES1; carboxylesterase 1 [EC:3.1.1.1]; K01044	PREDICTED: carboxylesterase 1 [EC:3.1.1.1];juvenile hormone esterase-like [Plutella xylostella]
LOC105387900	10.73	7.15	3.47	21.04	22.29	25.8	-2.4703	0.00136074	CEL; bile salt-stimulated lipase [EC:3.1.1.3 3.1.1.13]; K12298	PREDICTED: carboxylesterase 1E-like [Plutella xylostella]
LOC105393732	42.65	50.62	31.9	96.53	70.75	175.42	-2.09305	0.00611274	CES1; carboxylesterase 1 [EC:3.1.1.1]; K01044	PREDICTED: carboxylesterase-6-like [Plutella xylostella]
LOC105387487	0.22	0.23	0.12	2.17	0.47	0.35	-2.96142	0.0141063	NA	PREDICTED: carboxylesterase-6-like [Plutella xylostella]
LOC105383420	1.1	0.84	0.76	2.69	1.02	2.68	-1.87008	0.0260097	CES1; carboxylesterase 1 [EC:3.1.1.1]; K01044; NLGN; neuroligin; K07378	PREDICTED: carboxylesterase 1 [EC:3.1.1.1];neuroligin-4, Y-linked-like [Plutella xylostella]
LOC105382842	10.52	18.79	6.03	1.48	99.29	35.63	-2.95613	0.0262907	NA	PREDICTED: carboxylesterase 1C-like [Plutella xylostella]
LOC105389961	65.48	86.56	95.66	199.29	150.73	297.48	-2.02472	0.00700179	ATPeF0E, ATP5I; F-type H+-transporting ATPase subunit e; K02129	PREDICTED: ATP synthase subunit e, mitochondrial-like [Plutella xylostella]
LOC105384612	272.51	474.18	463.76	865.52	1193.42	942.03	-2.07158	0.0120211	ATPeF1G, ATP5C1, ATP3; F-type H+-transporting ATPase subunit gamma; K02136	PREDICTED: ATP synthase subunit gamma, mitochondrial [Plutella xylostella]
LOC105384385	286.04	439.72	441.62	733.3	1049.53	875.22	-1.95007	0.0170999	ATPeF1B, ATP5B, ATP2; F-type H+-transporting ATPase subunit beta [EC:7.1.2.2]; K02133	PREDICTED: ATP synthase subunit beta, mitochondrial-like [Plutella xylostella]
LOC105385286	332.32	384.65	374.44	693.62	754.85	891.89	-1.82413	0.0179557	ATPeF0D, ATP5H, ATP7; F-type H+-transporting ATPase subunit d; K02138	PREDICTED: ATP synthase subunit d, mitochondrial [Plutella xylostella]
LOC105394284	113.83	154.62	230.94	243.78	407.84	480.81	-1.8993	0.0213942	ATPeF0F, ATP5J2; F-type H+-transporting ATPase subunit f; K02130	PREDICTED: ATP synthase subunit f, mitochondrial [Plutella xylostella]
LOC105386388	115.22	182.98	134.48	315.23	226.3	286.97	-1.62366	0.0335662	ATPeF0B, ATP5F1, ATP4; F-type H+-transporting ATPase subunit b; K02127	PREDICTED: ATP synthase subunit b, mitochondrial-like [Plutella xylostella]
LOC105384776	529.18	846.96	905.4	1308.35	1756.11	1345.65	-1.71391	0.0370768	ATPeF1B, ATP5B, ATP2; F-type H+-transporting ATPase subunit beta [EC:7.1.2.2]; K02133	PREDICTED: ATP synthase subunit beta, mitochondrial [Plutella xylostella]
LOC105381987	346.6	464.45	433.52	568.1	827.23	831.39	-1.59175	0.0458545	ATPeF0O, ATP5O, ATP5; F-type H+-transporting ATPase subunit O; K02137	PREDICTED: ATP synthase subunit O, mitochondrial [Plutella xylostella]
LOC105391879	4.85	1.49	0.54	24.4	199.2	425.3	-7.3044	5.13711e-08	PRSS1_2_3; trypsin [EC:3.4.21.4]; K01312	PREDICTED: trypsin, alkaline B-like [Plutella xylostella]
LOC105386722	6.46	4.36	0.74	43.13	194.56	294.83	-6.29085	5.66417e-08	PRSS1_2_3; trypsin [EC:3.4.21.4]; K01312	PREDICTED: trypsin, alkaline B-like, partial [Plutella xylostella]
LOC105386078	2.47	0.67	0.28	8.07	33.35	94.4	-5.96174	4.98443e-07	PRSS1_2_3; trypsin [EC:3.4.21.4]; K01312	PREDICTED: trypsin, alkaline B-like [Plutella xylostella]
LOC105391590	10.02	5.83	2.07	18.83	383.85	218.04	-6.10355	4.9656e-06	NA	PREDICTED: trypsin, alkaline A-like isoform X2 [Plutella xylostella]
LOC105383573	3.25	11.1	3.23	34.33	70.28	245.36	-4.88566	5.2699e-06	PRSS1_2_3; trypsin [EC:3.4.21.4]; K01312	PREDICTED: trypsin-like [Plutella xylostella]
LOC105390846	0.18	0.64	0.13	10.44	38.21	51.86	-7.32885	1.61547e-10	NA	PREDICTED: facilitated trehalose transporter Tret1-like [Plutella xylostella]
LOC105396667	1.88	2.26	1	33.61	17.37	34.61	-4.68771	4.94395e-09	NA	PREDICTED: facilitated trehalose transporter Tret1-like [Plutella xylostella]
LOC105389237	0.84	0.68	0.44	6.98	28.07	39.24	-5.975	6.77325e-09	NA	PREDICTED: facilitated trehalose transporter Tret1-2 homolog, partial [Plutella xylostella]
LOC105385586	32.43	12.88	29.7	353.99	424.87	756.76	-5.05887	1.29482e-08	NA	PREDICTED: facilitated trehalose transporter Tret1-like [Plutella xylostella]
LOC105395363	0.46	0.48	0.41	4.31	14.61	25.39	-5.73159	1.76978e-08	NA	PREDICTED: facilitated trehalose transporter Tret1-like [Plutella xylostella]
LOC105381776	13.05	3.82	3.53	200.77	69.12	139.74	-5.02105	3.20113e-08	NA	PREDICTED: facilitated trehalose transporter Tret1-like [Plutella xylostella]
LOC105384505	2.9	3.02	1.37	19.5	4.57	21.4	-3.19642	9.81907e-05	NDUFAF2; NADH dehydrogenase [ubiquinone] 1 alpha subcomplex assembly factor 2; K18160; PLD3_4; phospholipase D3/4 [EC:3.1.4.4]; K16860	PREDICTED: NADH dehydrogenase [ubiquinone] 1; phospholipase D3, partial [Plutella xylostella]
LOC105383363	14.13	9.24	10.87	61.6	34.28	50.24	-2.78323	0.000105459	NDUFA11; NADH dehydrogenase (ubiquinone) 1 alpha subcomplex subunit 11; K03956	PREDICTED: NADH dehydrogenase (ubiquinone) 1; LOC105383363 [Plutella xylostella]
LOC105392236	3.95	4.25	0.89	23.8	4.53	23.49	-3.06791	0.000580175	NDUFAF2; NADH dehydrogenase [ubiquinone] 1 alpha subcomplex assembly factor 2; K18160; PLD3_4; phospholipase D3/4 [EC:3.1.4.4]; K16860	PREDICTED: NADH dehydrogenase [ubiquinone] 1 alpha; phospholipase D3-like [Plutella xylostella]
LOC105391039	0.89	1.81	0.37	3.71	2.68	6.04	-2.58549	0.00422863	NDUFAF3; NADH dehydrogenase [ubiquinone] 1 alpha subcomplex assembly factor 3; K09008	PREDICTED: NADH dehydrogenase [ubiquinone] 1 alpha subcomplex assembly factor 3-like [Plutella xylostella]
LOC105397921	15.46	17.95	7.16	38.54	29.78	43.19	-2.17003	0.00433102	NDUFV1; NADH dehydrogenase (ubiquinone) flavoprotein 1 [EC:7.1.1.2 1.6.99.3]; K03942	PREDICTED: NADH dehydrogenase [ubiquinone] flavoprotein 1, mitochondrial [Plutella xylostella]
LOC105394840	18.48	24.94	15.07	45.39	53.88	47.99	-2.09401	0.00495435	NDUFA8; NADH dehydrogenase (ubiquinone) 1 alpha subcomplex subunit 8; K03952	PREDICTED: NADH dehydrogenase [ubiquinone] 1 alpha subcomplex subunit 8-like [Plutella xylostella]
LOC105386172	76.61	101.13	93.44	213.97	258.88	246.02	-2.15551	0.00605962	NDUFA9; NADH dehydrogenase (ubiquinone) 1 alpha subcomplex subunit 9; K03953	PREDICTED: NADH dehydrogenase [ubiquinone] 1 alpha subcomplex subunit 9, mitochondrial [Plutella xylostella]
LOC105396483	0.5	0.36	0.41	0.52	0.6	2.61	-2.15473	0.0375415	GRIN1; glutamate receptor ionotropic, NMDA 1; K05208	PREDICTED: glutamate receptor; glutamate [NMDA] receptor subunit 1-like, partial [Plutella xylostella]
LOC105392280	30.25	140.47	100.33	433.24	134.85	226.87	-2.12999	0.0191471	SERPINB; serpin B; K13963	PREDICTED: serpin B; K13963; LOW QUALITY PROTEIN: antichymotrypsin-1-like [Plutella xylostella]
LOC105390989	2.65	1.72	2.27	7.96	149.97	119.57	-6.27065	7.72118e-07	aminopeptidase N ;ANPEP, CD13; [EC:3.4.11.2]; K11140	PREDICTED: membrane alanyl aminopeptidase-like [Plutella xylostella]
LOC105386096	3.58	1.97	2.26	29	3.42	7.89	-2.97247	0.00115246	aminopeptidase N ; ANPEP, CD13; [EC:3.4.11.2]; K11140	PREDICTED: aminopeptidase N [Plutella xylostella]
LOC105386349	17.21	19.43	4.4	7.78	298.48	91.93	-4.33648	0.00146565	aminopeptidase N;ANPEP, CD13; [EC:3.4.11.2]; K11140	PREDICTED: membrane alanyl aminopeptidase-like [Plutella xylostella]
LOC105393000	23.41	36.01	13.82	16.05	402.91	146.43	-3.95434	0.00157915	aminopeptidase N;ANPEP, CD13; [EC:3.4.11.2]; K11140	PREDICTED: membrane alanyl aminopeptidase-like [Plutella xylostella]
LOC105390997	58.11	83.15	5.59	30.26	639.33	524.54	-3.9325	0.00340959	aminopeptidase N;ANPEP, CD13; [EC:3.4.11.2]; K11140	PREDICTED: membrane alanyl aminopeptidase-like [Plutella xylostella]
LOC105386254	80.56	168.2	25.74	47.8	1211.95	681.78	-3.7702	0.00361404	aminopeptidase N; ANPEP, CD13; [EC:3.4.11.2]; K11140	PREDICTED: membrane alanyl aminopeptidase-like [Plutella xylostella]
LOC105386579	10.25	18.9	7.32	4.19	79.41	99.77	-3.12025	0.00716114	aminopeptidase N; ANPEP, CD13; [EC:3.4.11.2]; K11140	PREDICTED: aminopeptidase N-like [Plutella xylostella]
LOC105390996	3.83	4.75	2.02	10.58	9.47	6.15	-2.08187	0.00752915	aminopeptidase N; ANPEP, CD13; [EC:3.4.11.2]; K11140	PREDICTED: aminopeptidase N-like [Plutella xylostella]
LOC105384013	36.82	39.71	8.42	7.72	342.13	227.56	-3.71964	0.00490833	NA	PREDICTED: cadherin-87A-like [Plutella xylostella]
LOC105398335	2.47	1.42	0.99	1.98	3.53	3.81	-1.73207	0.0290227	NA	PREDICTED: DE-cadherin-like [Plutella xylostella]
LOC105381408	0.29	0	0	2.92	9.47	31.7	-7.63223	3.03185e-08	chitinase; E3.2.1.14;[EC:3.2.1.14]; K01183	PREDICTED: chitotriosidase-1-like [Plutella xylostella]
LOC105389954	7.36	9.55	6.15	32.01	73.34	68.31	-3.7142	1.97707e-05	ABCC4; ATP-binding cassette, subfamily C (CFTR/MRP), member 4; K05673	PREDICTED: multidrug resistance-associated protein 4-like isoform X3 [Plutella xylostella]
LOC105386683	0.38	0.65	0	1.87	4.85	8.59	-4.49612	5.25565e-05	ABCC10; ATP-binding cassette, subfamily C (CFTR/MRP), member 10; K05674	PREDICTED: multidrug resistance-associated protein 7-like [Plutella xylostella]
LOC105387880	1.94	2.9	0.26	8.66	6.8	22.14	-3.48856	0.000241227	ABCC4; ATP-binding cassette, subfamily C (CFTR/MRP), member 4; K05673	PREDICTED: multidrug resistance-associated protein 4-like [Plutella xylostella]
LOC105382849	0.9	1.43	0.27	2.53	4.04	11.18	-3.3871	0.00025212	ABCC10; ATP-binding cassette, subfamily C (CFTR/MRP), member 10; K05674	PREDICTED: multidrug resistance-associated protein 7-like [Plutella xylostella]
LOC105388338	16.2	19.23	17.85	34.87	108.72	70.14	-2.8595	0.00131	ABCC4; ATP-binding cassette, subfamily C (CFTR/MRP), member 4; K05673	PREDICTED: multidrug resistance-associated protein 4-like [Plutella xylostella]
LOC105397397	7.09	7.22	1.53	18.24	8.79	32.44	-2.52664	0.00290175	ABCC4; ATP-binding cassette, subfamily C (CFTR/MRP), member 4; K05673	PREDICTED: probable multidrug resistance-associated protein lethal(2)03659, partial [Plutella xylostella]
LOC105388339	2.55	3.56	2.13	3.03	12.73	8.43	-2.41926	0.00714807	ABCC4; ATP-binding cassette, subfamily C (CFTR/MRP), member 4; K05673	PREDICTED: multidrug resistance-associated protein 4-like [Plutella xylostella]
LOC105387104	2.08	2.7	0.77	4.88	2.66	9.04	-2.16292	0.010228	ABCC10; ATP-binding cassette, subfamily C (CFTR/MRP), member 10; K05674	PREDICTED: multidrug resistance-associated protein 7-like [Plutella xylostella]
LOC105386993	6.35	25.81	0.95	37.4	72.97	33.92	-2.98841	0.0124475	ABCC4; ATP-binding cassette, subfamily C (CFTR/MRP), member 4; K05673	PREDICTED: probable multidrug resistance-associated protein lethal(2)03659 [Plutella xylostella]
LOC105383528	1.61	0.73	0.74	2.33	2.15	6.73	-2.48439	0.0132641	ABCC4; ATP-binding cassette, subfamily C (CFTR/MRP), member 4; K05673; TUBA; tubulin alpha; K07374	PREDICTED: multidrug resistance-associated protein 4-like [Plutella xylostella]
LOC105391710	3.27	3.63	1.86	3.29	9.22	7.17	-2.01238	0.0166465	ABCC1; ATP-binding cassette, subfamily C (CFTR/MRP), member 1 [EC:7.6.2.3]; K05665	PREDICTED: multidrug resistance-associated protein 1 isoform X4 [Plutella xylostella]
LOC105397360	11.85	10.57	2.24	24.04	8.5	27.35	-1.9153	0.0220158	ABCC4; ATP-binding cassette, subfamily C (CFTR/MRP), member 4; K05673	PREDICTED: probable multidrug resistance-associated protein lethal(2)03659, partial [Plutella xylostella]
LOC105386992	19.62	26.2	8.26	4.53	68.09	74.7	-2.28292	0.039916	ABCC4; ATP-binding cassette, subfamily C (CFTR/MRP), member 4; K05673	PREDICTED: probable multidrug resistance-associated protein lethal(2)03659 [Plutella xylostella]
LOC105391726	2.07	2.41	0.42	7.09	1.04	3.96	-1.88559	0.0445613	ABCC4; ATP-binding cassette, subfamily C (CFTR/MRP), member 4; K05673; TUBA; tubulin alpha; K07374	PREDICTED: probable multidrug resistance-associated protein lethal(2)03659 [Plutella xylostella]
LOC105383248	6.2	3.17	1.87	25.45	17.43	25.99	-3.34407	1.71443e-05	GALNT; polypeptide N-acetylgalactosaminyltransferase [EC:2.4.1.41]; K00710	PREDICTED: N-acetylgalactosaminyltransferase 7 [Plutella xylostella]
LOC105396404	1.82	1.14	0.49	5.23	4.57	7.09	-2.98534	0.000217149	GALNT; polypeptide N-acetylgalactosaminyltransferase [EC:2.4.1.41]; K00710	PREDICTED: N-acetylgalactosaminyltransferase 5-like isoform X2 [Plutella xylostella]
LOC105383119	71.35	126.89	36.78	310.12	963.46	203.17	-3.62913	0.000669219	(GABA receptor modulator, acyl-CoA-binding protein)DBI, ACBP; diazepam-binding inhibitor ; K08762	PREDICTED: putative acyl-CoA-binding protein [Plutella xylostella]
LOC105396281	153.79	164.55	77.93	221.74	1538.09	616.12	-3.564	0.000715499	(GABA receptor modulator, acyl-CoA-binding protein); DBI, ACBP; diazepam-binding inhibitor ; K08762	PREDICTED: putative acyl-CoA-binding protein [Plutella xylostella]
LOC105397185	17.52	14.19	1.07	80.26	17.9	79.79	-3.01197	0.00213528	(GABA receptor modulator, acyl-CoA-binding protein)DBI, ACBP; diazepam-binding inhibitor ; K08762	PREDICTED: acyl-CoA-binding protein homolog [Plutella xylostella]
LOC105397186	210.94	382.6	106.45	393.55	1530.16	783.82	-2.86325	0.00385287	(GABA receptor modulator, acyl-CoA-binding protein)DBI, ACBP; diazepam-binding inhibitor ; K08762	PREDICTED: putative acyl-CoA-binding protein [Plutella xylostella]
LOC105383121	345.67	293.45	327.36	476.45	1183.02	646.29	-2.12916	0.0136752	(GABA receptor modulator, acyl-CoA-binding protein)DBI, ACBP; diazepam-binding inhibitor (; K08762	PREDICTED: acyl-CoA-binding protein homolog [Plutella xylostella]
LOC105398438	51.72	67.17	18.1	78.73	351.05	350.48	-3.34969	0.000770839	katE, CAT, catB, srpA; catalase [EC:1.11.1.6]; K03781	PREDICTED: catalase-like [Plutella xylostella]
LOC105390515	145.59	113.58	57.96	107.94	564.64	502.9	-2.7669	0.00405216	katE, CAT, catB, srpA; catalase [EC:1.11.1.6]; K03781	PREDICTED: catalase-like [Plutella xylostella]
LOC105389213	13.82	23.28	0.53	123.57	7.81	70.71	-2.97448	0.0184751	katE, CAT, catB, srpA; catalase [EC:1.11.1.6]; K03781	PREDICTED: catalase-like [Plutella xylostella]
LOC105398431	11.38	14.08	10.59	74.93	70.34	59.77	-3.2608	3.34804e-05	E3.1.3.1, phoA, phoB; alkaline phosphatase [EC:3.1.3.1]; K01077	PREDICTED: alkaline phosphatase-like [Plutella xylostella]
LOC105388506	0	0	0.13	0.11	15.44	8.85	-8.72876	3.17837e-05	UGT; glucuronosyltransferase [EC:2.4.1.17]; K00699	PREDICTED: UDP-glucuronosyltransferase 2B18-like [Plutella xylostella]
LOC105389450	0	0	0	0.06	7.09	3.46	-9.49713	5.15545e-05	UGT; glucuronosyltransferase [EC:2.4.1.17]; K00699	PREDICTED: UDP-glucuronosyltransferase 2B18-like isoform X2 [Plutella xylostella]
LOC105380067	6.76	5.87	2.48	21.54	21.27	30.31	-3.00766	9.93702e-05	UGT; glucuronosyltransferase [EC:2.4.1.17]; K00699	PREDICTED: UDP-glucuronosyltransferase 2B1-like [Plutella xylostella]
LOC105391951	28.25	26.55	5.59	73.54	50.93	150.35	-2.84674	0.00115118	UGT; glucuronosyltransferase [EC:2.4.1.17]; K00699	PREDICTED: UDP-glucuronosyltransferase 1-7C-like [Plutella xylostella]
LOC105383409	1.86	1.91	1.13	1.38	13.66	9.61	-3.21567	0.00192235	UGT; glucuronosyltransferase [EC:2.4.1.17]; K00699	PREDICTED: UDP-glucuronosyltransferase 2B15-like [Plutella xylostella]
LOC105393944	1.35	9.95	0.97	35.27	11.84	29.5	-3.20821	0.00238684	UGT; glucuronosyltransferase [EC:2.4.1.17]; K00699	PREDICTED: UDP-glucuronosyltransferase 2B2-like [Plutella xylostella]
LOC105383040	9.05	14.38	10.32	9.27	59.82	61.06	-2.74946	0.00448753	UGT; glucuronosyltransferase [EC:2.4.1.17]; K00699	PREDICTED: UDP-glucuronosyltransferase-like [Plutella xylostella]
LOC105380066	4.75	5.83	2.61	5.07	23.03	10.34	-2.46748	0.00878178	UGT; glucuronosyltransferase [EC:2.4.1.17]; K00699	PREDICTED: UDP-glucuronosyltransferase 2B1-like [Plutella xylostella]
LOC105396483	0.5	0.36	0.41	0.52	0.6	2.61	-2.15473	0.0375415	GRIN1; glutamate receptor ionotropic, NMDA 1; K05208	PREDICTED: glutamate [NMDA] receptor subunit 1-like, partial [Plutella xylostella]
LOC105395146	132.74	210.97	182.19	436.19	301.77	397.49	-1.85961	0.00134001	ATPeF0B, ATP5F1, ATP4; F-type H+-transporting ATPase subunit b; K02127	PREDICTED: ATP synthase subunit b, mitochondrial-like isoform X2 [Plutella xylostella]
LOC105383598	331.9	439.5	482.87	744.1	883.55	885.24	-1.72084	0.0020314	ATPeF0E, ATP5I; F-type H+-transporting ATPase subunit e; K02129	PREDICTED: ATP synthase subunit e, mitochondrial-like [Plutella xylostella]
LOC105384776	529.18	846.96	905.4	1359.92	1670.74	1464.56	-1.67958	0.00303508	ATPeF1B, ATP5B, ATP2; F-type H+-transporting ATPase subunit beta [EC:7.1.2.2]; K02133	PREDICTED: ATP synthase subunit beta, mitochondrial [Plutella xylostella]

## Sheet: BtC vs CL
		Table S3 The differentially expressed genes between Bt and chlorantraniliprole-resistant (BtC-DBM) and chlorantraniliprole resistant strain (CL-DBM) of Plutelle xylostella
			BtC-DBM vs CL-DBM
			Up-regulated
Gene	BtC-DBM_1	BtC-DBM_2	BtC-DBM_3	CL-DBM_1	CL-DBM_2	CL-DBM_3	logFC	FDR	KEGG	NR
LOC105380553	22.45	45.45	7.48	0.13	0.21	1.27	6.10479	1.77944e-05	TBXAS1, CYP5A; thromboxane-A synthase [EC:5.3.99.5]; K01832	PREDICTED: cytochrome P450 6B7-like [Plutella xylostella]
LOC105383631	2.12	14.79	10.68	0.44	0.49	0	4.34173	0.00155955	TBXAS1, CYP5A; thromboxane-A synthase [EC:5.3.99.5]; K01832	PREDICTED: cytochrome P450 9e2-like [Plutella xylostella]
LOC105391956	0.57	10.74	1.98	0.32	0.18	0	4.23513	0.00827887	NA	PREDICTED: cytochrome P450 6a2-like [Plutella xylostella]
LOC105382179	59.03	12.6	20.56	7.6	1.28	1.84	2.72427	0.00903563	NA	PREDICTED: cytochrome P450 6B1-like [Plutella xylostella]
LOC105397997	6.31	32.24	14.04	4.03	3.16	1.19	2.3945	0.0100111	NA	PREDICTED: cytochrome P450 4g15 [Plutella xylostella]
LOC105381698	7.71	81.56	22.47	0.63	0.69	5.04	3.8876	0.0113411	NA	PREDICTED: cytochrome P450 CYP12A2-like [Plutella xylostella]
LOC105386771	0.69	0.82	1.91	0.03	0.2	0.14	2.72782	0.0382938	NA	PREDICTED: acetylcholine receptor gar-3 [Plutella xylostella]
LOC105391613	6.04	0.22	3.73	0	0	0.23	4.68914	0.038298	NA	PREDICTED: acetylcholine receptor subunit alpha-like, partial [Plutella xylostella]
LOC105392138	53.68	12.9	82.87	7.03	11.37	0	2.74831	0.01248	GST, gst; glutathione S-transferase [EC:2.5.1.18]; K00799	PREDICTED: glutathione S-transferase 1-like [Plutella xylostella]
LOC105392147	5.15	1.92	2.1	0.57	0.65	0.28	2.23231	0.029143	CES1; carboxylesterase 1 [EC:3.1.1.1]; K01044; NLGN; neuroligin; K07378	PREDICTED: carboxylesterase 1 [EC:3.1.1.1];neuroligin-4, Y-linked-like [Plutella xylostella]
LOC105386120	36.62	8.73	44.16	3.01	3.51	1.89	3.1242	0.004378	ATPeFG, ATP5L, ATP20; F-type H+-transporting ATPase subunit g; K02140	PREDICTED: ATP synthase subunit g, mitochondrial-like [Plutella xylostella]
LOC105383969	7.27	0.49	2.92	0.11	0.25	0	4.14604	0.00869438	ATPeF1B, ATP5B, ATP2; F-type H+-transporting ATPase subunit beta [EC:7.1.2.2]; K02133	PREDICTED: ATP synthase subunit beta, mitochondrial-like [Plutella xylostella]
LOC105386029	25.79	17.21	29.8	0.19	0.53	0	5.92459	3.19826e-09	NA	PREDICTED: trypsin-1-like [Plutella xylostella]
LOC105384397	25.35	12	10.64	1	0.55	0	4.38474	8.96922e-06	NA	PREDICTED: trypsin-1-like [Plutella xylostella]
LOC105384400	14.11	9.58	8.41	0.8	0.44	0	4.13929	5.59264e-05	NA	PREDICTED: trypsin-1-like [Plutella xylostella]
LOC105388353	27.08	14.43	3.98	0	0.96	0	4.69726	0.000297845	PRSS1_2_3; trypsin [EC:3.4.21.4]; K01312	PREDICTED: trypsin [EC:3.4.21.4]; protein LOC105388353 [Plutella xylostella]
LOC105394168	87.6	52.82	143.73	9.38	20.4	1.42	2.96731	0.000776998	NA	PREDICTED: trypsin II-P29-like [Plutella xylostella]
LOC105382752	4.18	4.77	4.49	0.26	0.28	0	3.92939	0.003061	PRSS1_2_3; trypsin [EC:3.4.21.4]; K01312	PREDICTED: trypsin-1-like [Plutella xylostella]
LOC105393240	14.77	2.86	5.65	0.54	1.03	0	3.22141	0.00899628	PRSS1_2_3; trypsin [EC:3.4.21.4]; K01312	PREDICTED: trypsin CFT-1-like [Plutella xylostella]
LOC105388354	7.05	34.77	17.77	4.8	2.63	0	2.60735	0.0224386	PRSS1_2_3; trypsin [EC:3.4.21.4]; K01312	PREDICTED: trypsin [EC:3.4.21.4]; protein LOC105388354 [Plutella xylostella]
LOC105396221	4.98	1.05	0.95	0.15	0.34	0	3.06465	0.0413177	NA	PREDICTED: trypsin delta/gamma-like [Plutella xylostella]
LOC105385524	10.2	48.53	4.34	0	0.51	0	6.08367	6.22768e-05	NA	PREDICTED: facilitated trehalose transporter Tret1-like [Plutella xylostella]
LOC105383214	19.83	22.36	3.9	0	0.3	0.69	5.80891	6.38183e-05	NA	PREDICTED: facilitated trehalose transporter Tret1-like [Plutella xylostella]
LOC105398494	2.04	5.93	1.6	0.12	0	0	5.83202	0.00135072	NA	PREDICTED: facilitated trehalose transporter Tret1-like [Plutella xylostella]
LOC105381246	0.75	9.21	2.8	0	0	0	8.44665	0.00143078	NA	PREDICTED: facilitated trehalose transporter Tret1-like [Plutella xylostella]
LOC105384202	23.28	163.59	25.3	5.2	0.32	2.95	4.30356	0.00161102	NA	PREDICTED: facilitated trehalose transporter Tret1-like [Plutella xylostella]
LOC105386035	1.59	7.79	0.4	0	0.12	0	5.39261	0.0035983	NA	PREDICTED: facilitated trehalose transporter Tret1-like [Plutella xylostella]
LOC105381247	0.74	8.34	1.52	0.11	0.06	0	5.29833	0.00404848	NA	PREDICTED: facilitated trehalose transporter Tret1-like [Plutella xylostella]
LOC105398275	49.69	35.6	69.34	16.03	8.74	4.61	2.16382	0.00596838	NA	PREDICTED: facilitated trehalose transporter Tret1-like [Plutella xylostella]
LOC105398527	0.86	3.54	1.45	0.26	0	0	4.08766	0.0197949	NA	PREDICTED: facilitated trehalose transporter Tret1-like [Plutella xylostella]
LOC105381802	32.45	4.57	18.78	0.46	2.28	0	3.78125	0.00117317	NDUFS7; NADH dehydrogenase (ubiquinone) Fe-S protein 7 [EC:7.1.1.2 1.6.99.3]; K03940	PREDICTED: NADH dehydrogenase (ubiquinone) oxidoreductase 20 kDa subunit-like [Plutella xylostella]
LOC105380503	16.43	5.41	18.73	0.93	2.82	0	2.95141	0.00596838	NDUFS8; NADH dehydrogenase (ubiquinone) Fe-S protein 8 [EC:7.1.1.2 1.6.99.3]; K03941	PREDICTED: NADH dehydrogenase [ubiquinone] iron-sulfur protein 8, mitochondrial-like [Plutella xylostella]
LOC105392372	14.23	5.08	19.96	2.23	1.88	1.01	2.64536	0.0141414	NDUFV2; NADH dehydrogenase (ubiquinone) flavoprotein 2 [EC:7.1.1.2 1.6.99.3]; K03943	PREDICTED: NADH dehydrogenase [ubiquinone] flavoprotein 2, mitochondrial [Plutella xylostella]
LOC105384651	40.18	4.52	57.26	5.36	4.65	2.24	2.77017	0.0265129	NDUFB9; NADH dehydrogenase (ubiquinone) 1 beta subcomplex subunit 9; K03965	PREDICTED: NADH dehydrogenase [ubiquinone] 1 beta subcomplex subunit 9-like [Plutella xylostella]
LOC105388945	53.45	16.88	68.01	2.69	18.18	0	2.45282	0.0370981	NDUFB4; NADH dehydrogenase (ubiquinone) 1 beta subcomplex subunit 4; K03960	PREDICTED: NADH dehydrogenase (ubiquinone) 1 ;LOC105388945 [Plutella xylostella]
LOC105390313	31.52	2.61	17.29	3.82	2.62	0	2.53145	0.0465449	NDUFA12; NADH dehydrogenase (ubiquinone) 1 alpha subcomplex subunit 12; K11352	PREDICTED: NADH dehydrogenase [ubiquinone] 1 alpha subcomplex subunit 12 [Plutella xylostella]
LOC105387955	37.23	14.53	58.74	6.74	13.54	2.25	2.00086	0.0472862	NDUFS5; NADH dehydrogenase (ubiquinone) Fe-S protein 5; K03938	PREDICTED: NADH dehydrogenase [ubiquinone] iron-sulfur protein 5-like [Plutella xylostella]
LOC105394256	9.74	1.7	7.14	0.83	1.7	0	2.3449	0.0494956	NDUFS3; NADH dehydrogenase (ubiquinone) Fe-S protein 3 [EC:7.1.1.2 1.6.99.3]; K03936	PREDICTED: NADH dehydrogenase [ubiquinone] iron-sulfur protein 3, mitochondrial-like [Plutella xylostella]
LOC105397683	2.08	2.48	1.52	0	0.23	0	3.72216	0.0206465	ANPEP, CD13; aminopeptidase N [EC:3.4.11.2]; K11140	PREDICTED: aminopeptidase N, partial [Plutella xylostella]
LOC105380052	7.26	3.83	9.49	0.69	0.69	0	3.39432	0.000835502	NA	PREDICTED: chitinase protein ; molecular_function LOC105380052 [Plutella xylostella]
LOC105384268	13.75	2.39	13.65	0.47	1.16	0	3.59628	0.00466718	GALNT; polypeptide N-acetylgalactosaminyltransferase [EC:2.4.1.41]; K00710	PREDICTED: polypeptide N-acetylgalactosaminyltransferase 1-like isoform X2 [Plutella xylostella]
LOC105381129	16.96	3.32	14.56	1.07	2.65	0	2.84682	0.00699684	GALNT; polypeptide N-acetylgalactosaminyltransferase [EC:2.4.1.41]; K00710	PREDICTED: polypeptide N-acetylgalactosaminyltransferase 1-like [Plutella xylostella]
LOC105398673	2.71	1.07	1.36	0	0.2	0	3.69263	0.0153144	NA	PREDICTED: beta-1,4-N-acetylgalactosaminyltransferase bre-4 [Plutella xylostella]
LOC105384299	3.67	0.54	1.9	0.1	0.34	0	3.08211	0.023646	GALNT; polypeptide N-acetylgalactosaminyltransferase [EC:2.4.1.41]; K00710	PREDICTED: polypeptide N-acetylgalactosaminyltransferase 1-like [Plutella xylostella]
LOC105384292	8.95	0.36	3.4	0	0.14	0	5.25068	0.0267723	GALNT; polypeptide N-acetylgalactosaminyltransferase [EC:2.4.1.41]; K00710	PREDICTED: polypeptide N-acetylgalactosaminyltransferase 1-like [Plutella xylostella]
LOC105384295	2.12	0.2	1.29	0	0.17	0	3.45646	0.0484413	GALNT; polypeptide N-acetylgalactosaminyltransferase [EC:2.4.1.41]; K00710	PREDICTED: polypeptide N-acetylgalactosaminyltransferase 1-like [Plutella xylostella]
LOC105387387	32.45	162.04	9.94	1.84	0.82	1.15	5.45956	1.10319e-05	katE, CAT, catB, srpA; catalase [EC:1.11.1.6]; K03781	PREDICTED: catalase-2-like [Plutella xylostella]
LOC105389213	13.82	23.28	0.53	0	0.24	0	6.36429	0.00025481	katE, CAT, catB, srpA; catalase [EC:1.11.1.6]; K03781	PREDICTED: catalase-like [Plutella xylostella]
LOC105384526	46.07	179.66	29.02	1.85	0	4.62	4.93453	0.00140996	katE, CAT, catB, srpA; catalase [EC:1.11.1.6]; K03781	PREDICTED: catalase-like [Plutella xylostella]
LOC105385727	2.12	6.64	0	0	0	0	7.88726	0.0108896	katE, CAT, catB, srpA; catalase [EC:1.11.1.6]; K03781	PREDICTED: catalase-like [Plutella xylostella]
LOC105382331	35.91	241.76	47.93	0.61	1.14	1.84	6.4053	5.31178e-08	UGT; glucuronosyltransferase [EC:2.4.1.17]; K00699	PREDICTED: UDP-glucuronosyltransferase 2C1-like [Plutella xylostella]
LOC105392138	53.68	12.9	82.87	7.03	11.37	0	2.74831	0.01248	GST, gst; glutathione S-transferase [EC:2.5.1.18]; K00799	PREDICTED: microsomal glutathione S-transferase 1-like [Plutella xylostella]
LOC105395925	2.65	2.66	1.73	0.26	0.07	0	4.23118	0.0202143	glutathione peroxidase [EC:1.11.1.12]; K05361; JHEH; juvenile hormone epoxide hydrolase; K10719	PREDICTED: juvenile hormone epoxide hydrolase-like [Plutella xylostella]
LOC105392147	5.15	1.92	2.1	0.19	0.15	0.86	2.56219	0.0227913	CES1; carboxylesterase 1 [EC:3.1.1.1]; K01044; NLGN; neuroligin; K07378	PREDICTED: carboxylesterase 1, neuroligin-4, Y-linked-like [Plutella xylostella]
LOC105394398	1.46	3.6	2.57	0.12	0.2	0	3.87998	0.00382159	SLC17A5; MFS transporter, ACS family, solute carrier family 17 (sodium-dependent inorganic phosphate cotransporter), member 5; K12301	PREDICTED: putative inorganic phosphate cotransporter, partial [Plutella xylostella]
LOC105398772	6.04	6.76	4.28	0.69	1.6	0	2.38527	0.0138818	NA	PREDICTED: sodium-dependent phosphate transporter 1-like [Plutella xylostella]
LOC105380165	1.68	4.07	0.87	0	0	0	6.60622	0.023237	ATP1B, CD298; sodium/potassium-transporting ATPase subunit beta; K01540	PREDICTED: sodium/potassium-transporting ATPase subunit beta-2-like [Plutella xylostella]
LOC105381289	2.77	0.71	0.28	0	0.06	0	4.62788	0.0248025	ATP1B, CD298; sodium/potassium-transporting ATPase subunit beta; K01540	PREDICTED: sodium/potassium-transporting ATPase subunit beta-2-like [Plutella xylostella]
LOC105395761	7.85	16.32	5.6	2.85	2.88	0.89	1.85674	0.035555	NA	PREDICTED: sodium-independent sulfate anion transporter-like [Plutella xylostella]
LOC105383392	127.05	68.72	107.27	10.45	6.14	15.96	2.57831	0.000731185	NA	PREDICTED: serpin B13 isoform X2 [Plutella xylostella]
LOC105387636	9.46	1.7	4.14	0.17	0.18	0.42	4.3654	0.00308391	NA	PREDICTED: serine proteinase stubble-like [Plutella xylostella]
LOC105388982	191.63	29.54	166.02	14.44	27.12	7.24	2.76189	0.00315988	NA	PREDICTED: snake venom serine proteinase 4a-like [Plutella xylostella]
LOC105389050	2.52	6.33	9.04	1.04	1.83	0.37	2.19508	0.0264647	NA	PREDICTED: serine proteinase stubble [Plutella xylostella]
LOC105393254	1.52	12.5	13.52	0.64	2.61	0	2.75188	0.0329736	NA	PREDICTED: serine proteinase stubble-like, partial [Plutella xylostella]
LOC105387637	5.19	0.97	1.9	0.4	0.04	0.34	3.2904	0.0459312	NA	PREDICTED: serine proteinase stubble-like [Plutella xylostella]
LOC105391541	0.6	5.58	1.36	0	0.08	0	5.63652	0.000661324	ABCB1, CD243; ATP-binding cassette, subfamily B (MDR/TAP), member 1 [EC:7.6.2.2]; K05658	PREDICTED: multidrug resistance protein homolog 49-like [Plutella xylostella]
LOC105383461	2.83	7.66	2.13	0.32	0.97	0	2.89988	0.0048446	ABCB1, CD243; ATP-binding cassette, subfamily B (MDR/TAP), member 1 [EC:7.6.2.2]; K05658	PREDICTED: multidrug resistance protein homolog 49-like [Plutella xylostella]
LOC105394107	5.38	11.31	2.31	0.84	1.62	0	2.60145	0.0122664	ABCB1, CD243; ATP-binding cassette, subfamily B (MDR/TAP), member 1 [EC:7.6.2.2]; K05658	PREDICTED: multidrug resistance protein homolog 49-like [Plutella xylostella]
LOC105388937	0.62	5.19	0.79	0.1	0.08	0.25	4.09832	0.0267723	ABCB1, CD243; ATP-binding cassette, subfamily B (MDR/TAP), member 1 [EC:7.6.2.2]; K05658	PREDICTED: multidrug resistance protein homolog 49-like [Plutella xylostella]
			Down-regulated
Gene	BtC-DBM_1	BtC-DBM_2	BtC-DBM_3	CL-DBM_1	CL-DBM_2	CL-DBM_3	logFC	FDR	KEGG	NR
LOC105386494	9.49	12.52	5.61	40.95	40.45	15.96	-2.06957	0.00502804	TBXAS1, CYP5A; thromboxane-A synthase [EC:5.3.99.5]; K01832	PREDICTED: cytochrome P450 6B6-like [Plutella xylostella]
LOC105387005	14.22	14.21	8.86	60.11	59	16.46	-2.08669	0.00545189	TBXAS1, CYP5A; thromboxane-A synthase [EC:5.3.99.5]; K01832	PREDICTED: cytochrome P450 6B6-like [Plutella xylostella]
LOC105380105	14.17	26.69	35.69	79.18	135.96	42.71	-1.91724	0.0195088	NA	PREDICTED: cytochrome P450 4g15-like [Plutella xylostella]
LOC105381130	6.82	7.1	5.43	16.34	42.36	4.41	-1.87125	0.043266	NA	PREDICTED: cytochrome P450 4C1-like [Plutella xylostella]
LOC105389539	39.38	9.15	7.08	85.72	120.06	33.81	-2.40698	0.00765611	GST, gst; glutathione S-transferase [EC:2.5.1.18]; K00799	PREDICTED: glutathione S-transferase 1-1-like [Plutella xylostella]
LOC105395132	27.96	43.31	42.3	127.91	99.74	73.37	-1.67782	0.0263479	GST, gst; glutathione S-transferase [EC:2.5.1.18]; K00799	PREDICTED: glutathione S-transferase 1-like [Plutella xylostella]
LOC105398177	2.61	4.06	1.75	8.17	14.98	2.97	-1.85615	0.0460366	CES1; carboxylesterase 1 [EC:3.1.1.1]; K01044	PREDICTED: carboxylesterase 1 [EC:3.1.1.1];juvenile hormone esterase-like [Plutella xylostella]
LOC105390385	3.16	1.15	8.36	53.65	12.94	39.28	-3.36909	0.00224533	carboxylesterase 1 [EC:3.1.1.1]; CES1; carboxylesterase 1 [EC:3.1.1.1]; K01044	PREDICTED: juvenile hormone esterase-like [Plutella xylostella]
LOC105387900	10.32	3.6	13.16	31.46	36.15	30.85	-2.13877	0.0111725	carboxylesterase 1E-like; bile salt-stimulated lipase [EC:3.1.1.3 3.1.1.13]; K12298	PREDICTED: carboxylesterase 1E-like [Plutella xylostella]
LOC105386077	180.08	180.92	83.46	1072.7	215.49	2448.35	-3.71549	0.00117012	PRSS1_2_3; trypsin [EC:3.4.21.4]; K01312	PREDICTED: trypsin, alkaline C-like [Plutella xylostella]
LOC105382175	1.47	0.6	0.61	3.21	3.65	59.41	-5.30529	0.0013894	PRSS1_2_3; trypsin [EC:3.4.21.4]; K01312	PREDICTED: trypsin CFT-1-like [Plutella xylostella]
LOC105393886	37.55	22.61	8.37	130.5	27.26	559.98	-4.13272	0.00241798	PRSS1_2_3; trypsin [EC:3.4.21.4]; K01312	PREDICTED: trypsin, alkaline C-like, partial [Plutella xylostella]
LOC105398257	0.18	0.29	0.37	2.38	1.3	8.93	-4.08441	0.0230396	PRSS1_2_3; trypsin [EC:3.4.21.4]; K01312	PREDICTED: trypsin, alkaline C-like [Plutella xylostella]
LOC105383573	3.25	11.1	3.23	15.13	5.31	63.68	-2.85941	0.0344522	PRSS1_2_3; trypsin [EC:3.4.21.4]; K01312	PREDICTED: trypsin-like [Plutella xylostella]
LOC105382197	13.4	22.48	5.38	33.36	17.31	88.7	-2.34892	0.0370981	PRSS1_2_3; trypsin [EC:3.4.21.4]; K01312	PREDICTED: trypsin [EC:3.4.21.4]; K01312; vitellin-degrading protease-like [Plutella xylostella]
LOC105392753	3.52	0.53	0	3.32	1.82	40.65	-4.16933	0.0389088	PRSS1_2_3; trypsin [EC:3.4.21.4]; K01312	PREDICTED: trypsin-like [Plutella xylostella]
LOC105382173	0.15	0	0	1.22	0	6.11	-5.34924	0.0390843	PRSS1_2_3; trypsin [EC:3.4.21.4]; K01312	PREDICTED: trypsin, alkaline C-like [Plutella xylostella]
LOC105391896	636.79	728.21	199.67	1517.71	284.44	4237.79	-2.63464	0.0408493	PRSS1_2_3; trypsin [EC:3.4.21.4]; K01312	PREDICTED: trypsin, alkaline C-like, partial [Plutella xylostella]
LOC105383572	7.21	11.12	5.91	19.62	6.75	60.58	-2.40799	0.0452505	PRSS1_2_3; trypsin [EC:3.4.21.4]; K01312	PREDICTED: trypsin-like [Plutella xylostella]
LOC105382737	1.93	1.79	0.44	17.86	17.14	0.6	-3.26235	0.00430541	NA	PREDICTED: facilitated trehalose transporter Tret1-2 homolog [Plutella xylostella]
LOC105384666	6.07	3.21	1.68	15.21	18.9	2.72	-2.00151	0.0373959	NA	PREDICTED: facilitated trehalose transporter Tret1-like [Plutella xylostella]
LOC105386486	0	0.04	0.1	1.48	1.11	1.17	-5.12856	0.00044201	NA	PREDICTED: glutamate receptor ionotropic, delta-1-like [Plutella xylostella]
LOC105392280	30.25	140.47	100.33	438.22	766.36	320.7	-2.69234	0.00170836	SERPINB; serpin B; K13963	PREDICTED: serpin B; K13963: antichymotrypsin-1-like [Plutella xylostella]
LOC105390989	2.65	1.72	2.27	5.91	3.59	31.52	-3.26666	0.00660657	ANPEP, CD13; aminopeptidase N [EC:3.4.11.2]; K11140	PREDICTED: aminopeptidase N-like [Plutella xylostella]
LOC105392901	3.64	3.85	2.32	14.56	5.66	51.78	-3.3615	0.0113411	ANPEP, CD13; aminopeptidase N [EC:3.4.11.2]; K11140	PREDICTED: aminopeptidase N [EC:3.4.11.2]; K11140 [Plutella xylostella]
LOC105392894	0.84	2.07	0.35	5.7	7.57	3.28	-2.56313	0.00723598	NA	PREDICTED: UDP-glucuronosyltransferase 2B15-like [Plutella xylostella]
LOC105393950	2.69	4.95	2.36	8.08	12.81	6.53	-1.71807	0.0376197	UGT; glucuronosyltransferase [EC:2.4.1.17]; K00699	PREDICTED: UDP-glucuronosyltransferase 2C1-like [Plutella xylostella]
LOC105391968	1.75	0.98	0	2.57	44.07	31.07	-5.685	3.42245e-05	ACHE; acetylcholinesterase [EC:3.1.1.7]; K01049	PREDICTED: acetylcholinesterase [EC:3.1.1.7];cholinesterase-like, partial [Plutella xylostella]
LOC105386172	76.61	101.13	93.44	213.97	258.88	246.02	-2.15551	0.00605962	NDUFA9; NADH dehydrogenase (ubiquinone) 1 alpha subcomplex subunit 9; K03953	PREDICTED: NADH dehydrogenase [ubiquinone] 1 alpha subcomplex subunit 9, mitochondrial [Plutella xylostella]
LOC105392923	21.55	45.78	36.11	190.22	137.1	30.68	-1.93165	0.0278232	NA	PREDICTED: mitochondrial sodium/hydrogen exchanger 9B2-like isoform X3 [Plutella xylostella]
LOC105385590	6.73	14.37	10.63	37.01	26.59	37.41	-2.03532	0.0115775	ABCB1, CD243; ATP-binding cassette, subfamily B (MDR/TAP), member 1 [EC:7.6.2.2]; K05658	PREDICTED: multidrug resistance protein 1-like [Plutella xylostella]
LOC105384013	26.76	8.2	72.74	289.27	269.96	238.05	-2.95981	0.00375121	NA	PREDICTED: cadherin-87A-like [Plutella xylostella]

## Sheet: BtC vs SS
	Table S3 The differentially expressed genes between Bt and chlorantraniliprole-resistant (BtC-DBM) and susceptible strain (SS-DBM) of Plutelle xylostella
			BtC-DBM vs SS-DBM
			Up-regulated
Gene	BtC-DBM_1	BtC-DBM_2	BtC-DBM_3	SS-DBM_1	SS-DBM_2	SS-DBM_3	logFC	FDR	KEGG	NR
LOC105382179	59.03	12.6	20.56	0.04	0.24	0.04	7.35601	2.27506e-15	NA	PREDICTED: cytochrome P450 6B1-like [Plutella xylostella]
LOC105380553	22.45	45.45	7.48	0.09	0.41	0.13	6.18902	7.79303e-12	TBXAS1, CYP5A; thromboxane-A synthase [EC:5.3.99.5]; K01832	PREDICTED: cytochrome P450 6B7-like [Plutella xylostella]
LOC105387501	3.03	2.99	3.52	0.13	0.08	0.08	4.23171	2.07124e-06	SAD, CYP315A1; ecdysteroid 2-hydroxylase; K10722	PREDICTED: cytochrome P450 315a1, mitochondrial-like isoform X2 [Plutella xylostella]
LOC105398192	30.62	19.71	27.84	0.17	3.01	0.72	3.72732	7.8217e-06	NA	PREDICTED: cytochrome P450 301a1, mitochondrial [Plutella xylostella]
LOC105397997	6.31	32.24	14.04	0.91	1.86	0.65	3.30514	1.20138e-05	NA	PREDICTED: cytochrome P450 4g15 [Plutella xylostella]
LOC105395119	1.42	3.3	0.59	0	0	0	7.26873	3.34287e-05	SAD, CYP315A1; ecdysteroid 2-hydroxylase; K10722	PREDICTED: cytochrome P450 315a1, mitochondrial-like isoform X2 [Plutella xylostella]
LOC105381698	7.71	81.56	22.47	1.36	0.85	2.83	3.67491	0.00010244	NA	PREDICTED: cytochrome P450 CYP12A2-like [Plutella xylostella]
LOC105391956	0.57	10.74	1.98	0.22	0.03	0.18	4.12604	0.000813295	NA	PREDICTED: cytochrome P450 6a2-like [Plutella xylostella]
LOC105398661	0.98	9.99	2.18	0.32	0.15	0.24	3.44634	0.00114202	NA	PREDICTED: cytochrome P450 6a14 [Plutella xylostella]
LOC105380465	6.71	8.06	3.64	0.16	1.22	0.03	3.1247	0.00144019	NA	PREDICTED: cytochrome P450 6B6-like [Plutella xylostella]
LOC105386629	4.07	33.46	16.12	0.7	3.78	0.51	2.8857	0.00204141	NA	PREDICTED: cytochrome P450 9f2 [Plutella xylostella]
LOC105389044	16.44	5.14	7.75	0.23	1.94	0.05	3.12411	0.00219877	NA	PREDICTED: cytochrome P450 4g15-like [Plutella xylostella]
LOC105383631	2.12	14.79	10.68	0.75	1.36	0.08	3.05313	0.00326806	TBXAS1, CYP5A; thromboxane-A synthase [EC:5.3.99.5]; K01832	PREDICTED: cytochrome P450 9e2-like [Plutella xylostella]
LOC105381026	7.67	2.42	1.76	0.07	0.79	0.17	2.82342	0.00349734	NA	PREDICTED: cytochrome P450 4V2-like [Plutella xylostella]
LOC105397321	8.81	17.11	4.65	0.25	1.51	1.6	2.44581	0.00394056	NA	PREDICTED: cytochrome P450 6k1-like [Plutella xylostella]
LOC105397406	31.88	5.51	15.19	0.2	3.01	0	3.43837	0.00438948	NA	PREDICTED: cytochrome P450 4V2-like, partial [Plutella xylostella]
LOC105392138	53.68	12.9	82.87	0	0	0	10.9332	2.56123e-14	GST, gst; glutathione S-transferase [EC:2.5.1.18]; K00799	PREDICTED: glutathione S-transferase 1-like [Plutella xylostella]
LOC105389468	3.48	2.64	6.74	0.04	0.24	0.04	4.61999	1.74917e-06	NA	PREDICTED: acetylcholinesterase [Plutella xylostella]
LOC105398756	37.74	16.47	10.44	0.74	3.66	1.46	2.75856	8.89687e-05	ACHE; acetylcholinesterase [EC:3.1.1.7]; K01049	PREDICTED: acetylcholinesterase [EC:3.1.1.7]; carboxylesterase-6-like isoform X1 [Plutella xylostella]
LOC105382360	9.89	17.84	5.31	0.39	1.56	0.32	3.22042	3.2038e-05	NA	PREDICTED: carboxylesterase-6 [Plutella xylostella]
LOC105392147	5.15	1.92	2.1	0.06	0.4	0.06	3.46427	6.36397e-05	CES1; carboxylesterase 1 [EC:3.1.1.1]; K01044; NLGN; neuroligin; K07378	PREDICTED: carboxylesterase 1 [EC:3.1.1.1]; neuroligin-4, Y-linked-like [Plutella xylostella]
LOC105387899	20.24	19.25	15.21	1.67	5.07	1.35	2.1156	0.000508674	CES1; carboxylesterase 1 [EC:3.1.1.1]; K01044	PREDICTED: carboxylesterase 1 [EC:3.1.1.1]; juvenile hormone esterase-like [Plutella xylostella]
LOC105386120	36.62	8.73	44.16	0	0	0	10.0745	2.70671e-12	ATPeFG, ATP5L, ATP20; F-type H+-transporting ATPase subunit g; K02140	PREDICTED: ATP synthase subunit g, mitochondrial-like [Plutella xylostella]
LOC105393541	4.76	1.12	21.38	0.03	0.06	0	7.54764	2.13851e-08	ATPeF1B, ATP5B, ATP2; F-type H+-transporting ATPase subunit beta [EC:7.1.2.2]; K02133	PREDICTED: ATP synthase subunit beta, mitochondrial-like [Plutella xylostella]
LOC105398026	10.03	1.68	2.48	0	0	0	8.385	3.37153e-07	NA	PREDICTED: ATP synthase subunit beta, mitochondrial [Plutella xylostella]
LOC105382346	10.6	5.24	16.35	0.2	0.29	0	5.22664	3.85922e-07	ATPeF0D, ATP5H, ATP7; F-type H+-transporting ATPase subunit d; K02138	PREDICTED: ATP synthase subunit d, mitochondrial-like [Plutella xylostella]
LOC105383969	7.27	0.49	2.92	0	0.04	0	6.92287	3.5206e-06	ATPeF1B, ATP5B, ATP2; F-type H+-transporting ATPase subunit beta [EC:7.1.2.2]; K02133	PREDICTED: ATP synthase subunit beta, mitochondrial-like [Plutella xylostella]
LOC105395748	4.57	0.39	1.12	0.03	0	0	6.19958	4.85744e-05	ATPeF1B, ATP5B, ATP2; F-type H+-transporting ATPase subunit beta [EC:7.1.2.2]; K02133	PREDICTED: ATP synthase subunit beta, mitochondrial-like [Plutella xylostella]
LOC105394092	13.54	0.6	1.09	0	0.2	0	5.45836	0.000229643	ATPeF1B, ATP5B, ATP2; F-type H+-transporting ATPase subunit beta [EC:7.1.2.2]; K02133	PREDICTED: ATP synthase subunit beta, mitochondrial-like isoform X2 [Plutella xylostella]
LOC105391645	1.94	3.14	4.29	0	0	0	7.52654	3.02867e-06	PRSS1_2_3; trypsin [EC:3.4.21.4]; K01312	PREDICTED: trypsin CFT-1-like [Plutella xylostella]
LOC105397429	5.17	0.6	3.05	0	0	0	7.55252	2.72735e-05	PRSS1_2_3; trypsin [EC:3.4.21.4]; K01312	PREDICTED: trypsin, alkaline B-like [Plutella xylostella]
LOC105388738	1.86	12.66	2.7	0	0.1	0	6.24077	3.55666e-05	PRSS1_2_3; trypsin [EC:3.4.21.4]; K01312	PREDICTED: trypsin [EC:3.4.21.4]; LOC105388738 [Plutella xylostella]
LOC105380753	13	4.32	2.07	0	0	0	7.25072	3.69926e-05	PRSS1_2_3; trypsin [EC:3.4.21.4]; K01312	PREDICTED: trypsin-like [Plutella xylostella]
LOC105385716	3.46	1.94	8.81	0	0	0	7.16849	6.90595e-05	PRSS1_2_3; trypsin [EC:3.4.21.4]; K01312	PREDICTED: trypsin [EC:3.4.21.4];C15orf26-like [Plutella xylostella]
LOC105384556	22.4	8.43	5.07	0.35	1.46	0.14	3.50901	0.000102933	NA	PREDICTED: trypsin-1-like [Plutella xylostella]
LOC105390678	0.9	2.45	2.09	0	0.06	0	5.29289	0.000196291	PRSS1_2_3; trypsin [EC:3.4.21.4]; K01312	PREDICTED: trypsin CFT-1-like [Plutella xylostella]
LOC105397427	5.27	1.66	7.94	0.45	0.19	0.31	3.17834	0.000644732	PRSS1_2_3; trypsin [EC:3.4.21.4]; K01312	PREDICTED: trypsin, alkaline B-like [Plutella xylostella]
LOC105388737	1.9	3.63	0	0	0	0	6.80068	0.00124182	PRSS1_2_3; trypsin [EC:3.4.21.4]; K01312	PREDICTED: trypsin [EC:3.4.21.4]; LOC105388737 isoform X2 [Plutella xylostella]
LOC105384202	23.28	163.59	25.3	0.23	0.16	0	8.34638	8.53071e-13	NA	PREDICTED: facilitated trehalose transporter Tret1-like [Plutella xylostella]
LOC105383214	19.83	22.36	3.9	0	0	0.19	6.99573	1.68029e-10	NA	PREDICTED: facilitated trehalose transporter Tret1-like [Plutella xylostella]
LOC105398494	2.04	5.93	1.6	0	0	0	8.53311	4.13473e-08	NA	PREDICTED: facilitated trehalose transporter Tret1-like [Plutella xylostella]
LOC105385524	10.2	48.53	4.34	0.16	0.23	0.24	5.85582	1.10322e-07	NA	PREDICTED: facilitated trehalose transporter Tret1-like [Plutella xylostella]
LOC105381246	0.75	9.21	2.8	0	0.08	0	6.37079	2.61337e-06	NA	PREDICTED: facilitated trehalose transporter Tret1-like [Plutella xylostella]
LOC105398495	0.53	3.2	0.33	0	0	0	7.71325	4.95869e-05	NA	PREDICTED: facilitated trehalose transporter Tret1-like [Plutella xylostella]
LOC105386035	1.59	7.79	0.4	0.07	0.1	0	5.01282	0.000139208	NA	PREDICTED: facilitated trehalose transporter Tret1-like [Plutella xylostella]
LOC105381247	0.74	8.34	1.52	0.15	0	0	5.26603	0.000203894	NA	PREDICTED: facilitated trehalose transporter Tret1-like [Plutella xylostella]
LOC105382540	6.65	1.24	11.05	0.49	0.3	0.06	3.74134	0.000581541	NA	PREDICTED: facilitated trehalose transporter Tret1-like [Plutella xylostella]
LOC105381249	0.15	1.24	0.76	0	0	0	6.36054	0.00149233	NA	PREDICTED: facilitated trehalose transporter Tret1-like isoform X2 [Plutella xylostella]
LOC105383390	39.48	40.49	24.18	2.19	13.88	2.95	1.84314	0.00963869	NA	PREDICTED: facilitated trehalose transporter Tret1-like [Plutella xylostella]
LOC105386036	0.87	1.48	0.49	0	0.21	0.05	2.73044	0.0135765	NA	PREDICTED: facilitated trehalose transporter Tret1-like [Plutella xylostella]
LOC105380503	16.43	5.41	18.73	0	0	0	9.61692	8.44908e-12	NDUFS8; NADH dehydrogenase (ubiquinone) Fe-S protein 8 [EC:7.1.1.2 1.6.99.3]; K03941	PREDICTED: NADH dehydrogenase [ubiquinone] iron-sulfur protein 8, mitochondrial-like [Plutella xylostella]
LOC105388945	53.45	16.88	68.01	0.15	0.87	0.31	5.96959	9.14952e-11	NDUFB4; NADH dehydrogenase (ubiquinone) 1 beta subcomplex subunit 4; K03960	PREDICTED: NADH dehydrogenase (ubiquinone) 1; LOC105388945 [Plutella xylostella]
LOC105387955	37.23	14.53	58.74	0	1.02	0	6.07387	8.12597e-09	NDUFS5; NADH dehydrogenase (ubiquinone) Fe-S protein 5; K03938	PREDICTED: NADH dehydrogenase [ubiquinone] iron-sulfur protein 5-like [Plutella xylostella]
LOC105384651	40.18	4.52	57.26	0.3	0	0	7.42978	2.34844e-08	NDUFB9; NADH dehydrogenase (ubiquinone) 1 beta subcomplex subunit 9; K03965	PREDICTED: NADH dehydrogenase [ubiquinone] 1 beta subcomplex subunit 9-like [Plutella xylostella]
LOC105392372	14.23	5.08	19.96	0	0	0.35	5.95459	6.61967e-08	NDUFV2; NADH dehydrogenase (ubiquinone) flavoprotein 2 [EC:7.1.1.2 1.6.99.3]; K03943	PREDICTED: NADH dehydrogenase [ubiquinone] flavoprotein 2, mitochondrial [Plutella xylostella]
LOC105394256	9.74	1.7	7.14	0	0.33	0	5.01517	1.25834e-05	NDUFS3; NADH dehydrogenase (ubiquinone) Fe-S protein 3 [EC:7.1.1.2 1.6.99.3]; K03936	PREDICTED: NADH dehydrogenase [ubiquinone] iron-sulfur protein 3, mitochondrial-like [Plutella xylostella]
LOC105381802	32.45	4.57	18.78	0.47	0.67	1.18	3.76838	1.94595e-05	NDUFS7; NADH dehydrogenase (ubiquinone) Fe-S protein 7 [EC:7.1.1.2 1.6.99.3]; K03940	PREDICTED: NADH dehydrogenase (ubiquinone); NADH-ubiquinone oxidoreductase 20 kDa subunit-like [Plutella xylostella]
LOC105380216	8.1	0.99	9.64	0	0.27	0	5.35121	3.95181e-05	NDUFS1; NADH dehydrogenase (ubiquinone) Fe-S protein 1 [EC:7.1.1.2 1.6.99.3]; K03934	PREDICTED: NADH dehydrogenase (ubiquinone) ; NADH-ubiquinone oxidoreductase 75 kDa subunit, mitochondrial-like [Plutella xylostella]
LOC105390313	31.52	2.61	17.29	0.43	0	0.65	4.65992	5.25899e-05	NDUFA12; NADH dehydrogenase (ubiquinone) 1 alpha subcomplex subunit 12; K11352	PREDICTED: NADH dehydrogenase [ubiquinone] 1 alpha subcomplex subunit 12 [Plutella xylostella]
LOC105385887	3.64	0.96	1.75	0.1	0.05	0	4.54983	6.17892e-05	NDUFS2; NADH dehydrogenase (ubiquinone) Fe-S protein 2 [EC:7.1.1.2 1.6.99.3]; K03935	PREDICTED: NADH dehydrogenase (ubiquinone); NADH-ubiquinone oxidoreductase 49 kDa subunit-like [Plutella xylostella]
LOC105388612	7.59	1.86	0	0	0.19	0	4.61282	0.0039602	NDUFA11; NADH dehydrogenase (ubiquinone) 1 alpha subcomplex subunit 11; K03956	PREDICTED: NADH dehydrogenase [ubiquinone] 1 alpha subcomplex subunit 11-like [Plutella xylostella]
LOC105395218	4.79	1.23	3.38	0.33	0.51	0.27	2.32128	0.0107168	NDUFA6; NADH dehydrogenase (ubiquinone) 1 alpha subcomplex subunit 6; K03950	PREDICTED: NADH dehydrogenase [ubiquinone] 1 alpha subcomplex subunit 6-like [Plutella xylostella]
LOC105395755	1.32	0.66	0.56	0	0.13	0.04	3.13311	0.0019429	NA	PREDICTED: glutamate receptor ionotropic, kainate 2-like [Plutella xylostella]
LOC105390927	2.26	2.17	2.27	0.04	0.52	0	2.96497	0.00607063	NA	PREDICTED: glutamate receptor ionotropic, delta-1 [Plutella xylostella]
LOC105384753	95.29	81.52	45.88	14.3	22.71	12.37	1.449	0.00880621	NA	PREDICTED: glutamate receptor ionotropic, delta-2 [Plutella xylostella]
LOC105392273	2.83	2.43	1.77	0.34	0.65	0.29	1.73833	0.0316956	NA	PREDICTED: glutamate receptor 1-like, partial [Plutella xylostella]
LOC105397682	4.24	6.18	3.57	0.26	2.15	0.37	1.74087	0.0368052	NA	PREDICTED: glutamate receptor ionotropic, kainate 2-like, partial [Plutella xylostella]
LOC105387001	320.16	282.45	171.48	3.83	25.58	5.64	3.84792	1.42188e-07	SERPINB; serpin B; K13963	PREDICTED: serpin B3-like [Plutella xylostella]
LOC105383392	127.05	68.72	107.27	1.79	12.89	4.11	3.39112	2.18125e-06	NA	PREDICTED: serpin B13 isoform X2 [Plutella xylostella]
LOC105390554	3.8	5.25	3.5	0.32	0.99	0.32	2.27508	0.00250993	SERPINB; serpin B; K13963	PREDICTED: serpin B8-like [Plutella xylostella]
LOC105390553	2.16	3.11	3.05	0.11	0.64	0.23	2.40898	0.00605425	SERPINB; serpin B; K13963	PREDICTED: serpin B;-like [Plutella xylostella]
LOC105383414	52.01	38.77	25.92	4.02	19.87	4.6	1.40156	0.0421127	SERPINB; serpin B; K13963	PREDICTED: serpin B; K13963; antichymotrypsin-2-like [Plutella xylostella]
LOC105383415	67.1	47.29	28.26	3.94	24	6.5	1.40717	0.0472219	SERPINB; serpin B; K13963	PREDICTED: serpin B; K13963; LOC105383415 [Plutella xylostella]
LOC105386585	17.69	38.01	14.24	1.03	5.25	2.46	2.34597	0.000750495	ANPEP, CD13; aminopeptidase N [EC:3.4.11.2]; K11140	PREDICTED: aminopeptidase N-like isoform X2 [Plutella xylostella]
LOC105380001	8.15	8.81	7.47	1.19	2.34	0.41	1.99191	0.00301514	ANPEP, CD13; aminopeptidase N [EC:3.4.11.2]; K11140	PREDICTED: aminopeptidase N-like [Plutella xylostella]
LOC105394553	55.34	15.06	35.52	2.85	4.52	0	3.46378	0.000178048	DPP4, CD26; dipeptidyl-peptidase 4 [EC:3.4.14.5]; K01278	PREDICTED: spermine oxidase-like [Plutella xylostella]
LOC105389983	3.04	3.5	2.81	0.04	0.77	0.12	2.76265	0.00125713	FAT4; protocadherin Fat 4; K16669	PREDICTED: cadherin-related tumor suppressor [Plutella xylostella]
LOC105382108	8.62	2.88	3.72	0.34	1.43	0.41	2.13808	0.00253306	NA	PREDICTED: cadherin-23 [Plutella xylostella]
LOC105385326	45.36	54.09	40.93	0.81	4.72	0.61	3.9402	2.66726e-07	chitinase [EC:3.2.1.14]; K01183;E3.2.1.14;	PREDICTED: probable chitinase 3 [Plutella xylostella]
LOC105389028	121.43	17.55	59.09	1.1	4.24	0.14	4.56435	1.1164e-05	chitinase [EC:3.2.1.14]; K01183;E3.2.1.14;	PREDICTED: endochitinase [Plutella xylostella]
LOC105396871	2.64	8.03	1.47	0.06	0.3	0.03	4.29455	2.70929e-05	chitinase [EC:3.2.1.14]; K01183;E3.2.1.14;	PREDICTED: endochitinase A-like [Plutella xylostella]
LOC105390728	1.85	5.05	2.29	0.14	0.58	0.14	2.81776	0.000125461	chitinase [EC:3.2.1.14]; K01183;E3.2.1.14;	PREDICTED: mucin-5AC isoform X2 [Plutella xylostella]
LOC105385097	2.16	3.49	0	0.11	0.35	0.15	2.48004	0.0486696	chitinase [EC:3.2.1.14]; K01183;E3.2.1.14;	PREDICTED: probable chitinase 2 isoform X2 [Plutella xylostella]
LOC105387009	1.87	0	0.52	0	0	0.07	3.9593	0.0316117	ABCC4; ATP-binding cassette, subfamily C (CFTR/MRP), member 4; K05673	PREDICTED: uncharacterized protein LOC105387009, partial [Plutella xylostella]
LOC105388937	0.62	5.19	0.79	0.1	0.08	0.25	4.09832	0.0267723	ABCB1, CD243; ATP-binding cassette, subfamily B (MDR/TAP), member 1 [EC:7.6.2.2]; K05658	PREDICTED: multidrug resistance protein homolog 49-like [Plutella xylostella]
LOC105394107	5.38	11.31	2.31	0.84	1.62	0	2.60145	0.0122664	ABCB1, CD243; ATP-binding cassette, subfamily B (MDR/TAP), member 1 [EC:7.6.2.2]; K05658	PREDICTED: multidrug resistance protein homolog 49-like [Plutella xylostella]
LOC105383461	2.83	7.66	2.13	0.32	0.97	0	2.89988	0.0048446	ABCB1, CD243; ATP-binding cassette, subfamily B (MDR/TAP), member 1 [EC:7.6.2.2]; K05658	PREDICTED: multidrug resistance protein homolog 49-like [Plutella xylostella]
LOC105383461	2.83	7.66	2.13	0.32	0.97	0	2.89988	0.0048446	ABCB1, CD243; ATP-binding cassette, subfamily B (MDR/TAP), member 1 [EC:7.6.2.2]; K05658	PREDICTED: multidrug resistance protein homolog 49-like [Plutella xylostella]
LOC105384299	3.67	0.54	1.9	0.03	0	0	6.21653	1.04344e-05	GALNT; polypeptide N-acetylgalactosaminyltransferase [EC:2.4.1.41]; K00710	PREDICTED: polypeptide N-acetylgalactosaminyltransferase 1-like [Plutella xylostella]
LOC105384264	3.39	0.59	5.26	0	0	0	7.68306	2.62454e-05	GALNT; polypeptide N-acetylgalactosaminyltransferase [EC:2.4.1.41]; K00710	PREDICTED: polypeptide N-acetylgalactosaminyltransferase 1-like isoform X3 [Plutella xylostella]
LOC105390613	2.88	0.54	1.79	0	0	0	7.15542	4.76298e-05	GALNT; polypeptide N-acetylgalactosaminyltransferase [EC:2.4.1.41]; K00710	PREDICTED: polypeptide N-acetylgalactosaminyltransferase 1-like [Plutella xylostella]
LOC105384292	8.95	0.36	3.4	0	0	0	7.78011	7.58132e-05	GALNT; polypeptide N-acetylgalactosaminyltransferase [EC:2.4.1.41]; K00710	PREDICTED: polypeptide N-acetylgalactosaminyltransferase 1-like [Plutella xylostella]
LOC105396079	5.51	1.43	5.7	0	0.11	0.11	4.84402	0.000234995	B4GALT1; beta-1,4-galactosyltransferase 1 [EC:2.4.1.22 2.4.1.90 2.4.1.38 2.4.1.-]; K07966; B4GALT2; beta-1,4-galactosyltransferase 2 [EC:2.4.1.22 2.4.1.90 2.4.1.38 2.4.1.-]; K07967	PREDICTED: beta-1,4-N-acetylgalactosaminyltransferase bre-4-like [Plutella xylostella]
LOC105398673	2.71	1.07	1.36	0	0.12	0.13	3.55493	0.000646007	NA	PREDICTED: beta-1,4-N-acetylgalactosaminyltransferase bre-4 [Plutella xylostella]
LOC105390602	0.68	0.2	0.77	0	0	0	6.12157	0.0013159	GALNT; polypeptide N-acetylgalactosaminyltransferase [EC:2.4.1.41]; K00710	PREDICTED: polypeptide N-acetylgalactosaminyltransferase 1-like [Plutella xylostella]
LOC105384295	2.12	0.2	1.29	0	0	0.07	4.60663	0.00183202	GALNT; polypeptide N-acetylgalactosaminyltransferase [EC:2.4.1.41]; K00710	PREDICTED: polypeptide N-acetylgalactosaminyltransferase 1-like [Plutella xylostella]
LOC105384496	6.99	6	6.97	0.72	2.15	1.42	1.52484	0.016083	GALNT; polypeptide N-acetylgalactosaminyltransferase [EC:2.4.1.41]; K00710	PREDICTED: polypeptide N-acetylgalactosaminyltransferase 3-like [Plutella xylostella]
LOC105384526	46.07	179.66	29.02	0.43	0.56	0.16	7.08912	3.71607e-14	katE, CAT, catB, srpA; catalase [EC:1.11.1.6]; K03781	PREDICTED: catalase-like [Plutella xylostella]
LOC105387387	32.45	162.04	9.94	0.35	0	0.08	8.04505	5.4905e-10	katE, CAT, catB, srpA; catalase [EC:1.11.1.6]; K03781	PREDICTED: catalase-2-like [Plutella xylostella]
LOC105389213	13.82	23.28	0.53	0.05	0.05	0.05	7.07632	2.17103e-07	katE, CAT, catB, srpA; catalase [EC:1.11.1.6]; K03781	PREDICTED: catalase-like [Plutella xylostella]
LOC105385727	2.12	6.64	0	0	0	0	8.32311	6.66582e-05	katE, CAT, catB, srpA; catalase [EC:1.11.1.6]; K03781	PREDICTED: catalase-like [Plutella xylostella]
LOC105380644	32.22	34.38	29.46	2.16	6.27	4.08	2.24876	9.19032e-05	NA	PREDICTED: connectin-like [Plutella xylostella]
LOC105382331	35.91	241.76	47.93	0.41	0.36	0.21	7.64804	1.33504e-14	UGT; glucuronosyltransferase [EC:2.4.1.17]; K00699	PREDICTED: UDP-glucuronosyltransferase 2C1-like [Plutella xylostella]
LOC105388828	3.48	5.16	3.33	0.44	1.08	0.52	1.87409	0.00943441	UGT; glucuronosyltransferase [EC:2.4.1.17]; K00699	PREDICTED: UDP-glucuronosyltransferase 2B15-like [Plutella xylostella]
LOC105394398	1.46	3.6	2.57	0.12	0.2	0	3.87998	0.00382159	SLC17A5; MFS transporter, ACS family, solute carrier family 17 (sodium-dependent inorganic phosphate cotransporter), member 5; K12301	PREDICTED: putative inorganic phosphate cotransporter, partial [Plutella xylostella]
LOC105398772	6.04	6.76	4.28	0.69	1.6	0	2.38527	0.0138818	NA	PREDICTED: sodium-dependent phosphate transporter 1-like [Plutella xylostella]
LOC105380165	1.68	4.07	0.87	0	0	0	6.60622	0.023237	ATP1B, CD298; sodium/potassium-transporting ATPase subunit beta; K01540	PREDICTED: sodium/potassium-transporting ATPase subunit beta-2-like [Plutella xylostella]
LOC105392280	30.25	140.47	100.33	438.22	766.36	320.7	-2.69234	0.00170836	SERPINB; serpin B; K13963	PREDICTED: LOW QUALITY PROTEIN: antichymotrypsin-1-like [Plutella xylostella]
LOC105387636	9.46	1.7	4.14	0.17	0.18	0.42	4.3654	0.00308391	NA	PREDICTED: serine proteinase stubble-like [Plutella xylostella]
LOC105388982	191.63	29.54	166.02	14.44	27.12	7.24	2.76189	0.00315988	NA	PREDICTED: snake venom serine proteinase 4a-like [Plutella xylostella]
LOC105389050	2.52	6.33	9.04	1.04	1.83	0.37	2.19508	0.0264647	NA	PREDICTED: serine proteinase stubble [Plutella xylostella]
LOC105387637	5.19	0.97	1.9	0.4	0.04	0.34	3.2904	0.0459312	NA	PREDICTED: serine proteinase stubble-like [Plutella xylostella]
			Down-regulated
Gene	BtC-DBM_1	BtC-DBM_2	BtC-DBM_3	SS-DBM_1	SS-DBM_2	SS-DBM_3	logFC	FDR	KEGG	NR
LOC105386484	8.27	9.67	3.1	158	74.7	108.57	-4.81975	2.32646e-12	TBXAS1, CYP5A; thromboxane-A synthase [EC:5.3.99.5]; K01832	PREDICTED: cytochrome P450 6B6-like [Plutella xylostella]
LOC105392345	4.76	5.02	0.6	82.74	80.7	40.43	-5.02133	5.48098e-11	TBXAS1, CYP5A; thromboxane-A synthase [EC:5.3.99.5]; K01832	PREDICTED: cytochrome P450 6B5-like [Plutella xylostella]
LOC105386477	5.33	4.89	1.91	60.47	24.8	52.09	-4.31447	4.13994e-10	TBXAS1, CYP5A; thromboxane-A synthase [EC:5.3.99.5]; K01832	PREDICTED: cytochrome P450 6k1-like [Plutella xylostella]
LOC105395328	2.1	2.99	2.89	42.93	15.77	28.35	-4.22523	5.03479e-10	TBXAS1, CYP5A; thromboxane-A synthase [EC:5.3.99.5]; K01832	PREDICTED: cytochrome P450 6B6-like [Plutella xylostella]
LOC105383408	1.31	4.57	3.68	58.82	23.15	28.44	-4.26999	1.29674e-08	NA	PREDICTED: cytochrome P450 6k1-like [Plutella xylostella]
LOC105398295	13.86	6.22	1.34	97.25	81.04	40.33	-4.13686	1.30315e-07	TBXAS1, CYP5A; thromboxane-A synthase [EC:5.3.99.5]; K01832	PREDICTED: cytochrome P450 6B5-like [Plutella xylostella]
LOC105387005	14.22	14.21	8.86	59.67	47.26	63.9	-2.97627	1.48617e-07	TBXAS1, CYP5A; thromboxane-A synthase [EC:5.3.99.5]; K01832	PREDICTED: cytochrome P450 6B6-like [Plutella xylostella]
LOC105382422	4.01	6.21	2.2	26.04	15.66	23.41	-3.16573	5.16249e-07	PHM, CYP306A1; ecdysteroid 25-hydroxylase; K10720	PREDICTED: cytochrome P450 306a1 [Plutella xylostella]
LOC105389269	16.87	10.82	8.41	189.01	94.25	160.13	-4.43346	2.91249e-12	GST, gst; glutathione S-transferase [EC:2.5.1.18]; K00799	PREDICTED: glutathione S-transferase; LOC105389269 [Plutella xylostella]
LOC105392478	41.03	41.82	16.62	257.79	160.56	237.55	-3.52487	1.15961e-08	GST, gst; glutathione S-transferase [EC:2.5.1.18]; K00799	PREDICTED: glutathione S-transferase 1-like [Plutella xylostella]
LOC105386021	89.55	101.97	55.97	582.08	347.19	579.81	-3.40592	1.26817e-08	GST, gst; glutathione S-transferase [EC:2.5.1.18]; K00799	PREDICTED: glutathione S-transferase 1-like [Plutella xylostella]
LOC105389539	39.38	9.15	7.08	166.85	106.52	193.78	-3.94203	2.11244e-07	GST, gst; glutathione S-transferase [EC:2.5.1.18]; K00799	PREDICTED: glutathione S-transferase 1-1-like [Plutella xylostella]
LOC105394254	5.55	6.53	1.95	26.49	18.78	27.31	-3.14371	8.13188e-07	GST, gst; glutathione S-transferase [EC:2.5.1.18]; K00799	PREDICTED: glutathione S-transferase theta-2-like [Plutella xylostella]
LOC105393992	16.45	16.11	4.32	39.55	50.78	49.72	-2.69048	1.63707e-05	GST, gst; glutathione S-transferase [EC:2.5.1.18]; K00799; SE; pyrimidodiazepine synthase [EC:1.5.4.1]; K00310	PREDICTED: glutathione S-transferase [EC:2.5.1.18]: pyrimidodiazepine synthase-like [Plutella xylostella]
LOC105395140	406.35	383.52	441.1	1186.97	1122.98	1100.84	-2.20643	3.72303e-05	GST, gst; glutathione S-transferase [EC:2.5.1.18]; K00799	PREDICTED: glutathione S-transferase 1-like [Plutella xylostella]
LOC105383753	9.22	11.29	6.75	38.38	16.82	32.05	-2.47223	7.33796e-05	GST, gst; glutathione S-transferase [EC:2.5.1.18]; K00799	PREDICTED: glutathione S-transferase theta-2-like [Plutella xylostella]
LOC105389537	34.12	48.38	37.77	90.24	100.46	88.75	-1.94142	0.000322038	GST, gst; glutathione S-transferase [EC:2.5.1.18]; K00799	PREDICTED: glutathione S-transferase 1-like [Plutella xylostella]
LOC105391652	744.23	581.21	712.14	1474.31	1419.16	1489.24	-1.85176	0.000571247	HPGDS; prostaglandin-H2 D-isomerase / glutathione transferase [EC:5.3.99.2 2.5.1.18]; K04097	PREDICTED: glutathione S-transferase 2-like [Plutella xylostella]
LOC105391548	756.98	744.14	1034.93	1856.87	1506.23	1651.56	-1.71691	0.00222509	HPGDS; prostaglandin-H2 D-isomerase / glutathione transferase [EC:5.3.99.2 2.5.1.18]; K04097	PREDICTED: glutathione S-transferase-like [Plutella xylostella]
LOC105380707	32.82	63.61	37.42	73.78	81.67	105.53	-1.71225	0.00352162	GST, gst; glutathione S-transferase [EC:2.5.1.18]; K00799	PREDICTED: glutathione S-transferase 1-1-like [Plutella xylostella]
LOC105395132	27.96	43.31	42.3	51.8	94.33	66.55	-1.58933	0.00503888	GST, gst; glutathione S-transferase [EC:2.5.1.18]; K00799	PREDICTED: glutathione S-transferase 1-like [Plutella xylostella]
LOC105384553	768.94	864.01	520.46	1128.11	943.45	1503.64	-1.52259	0.00831748	GST, gst; glutathione S-transferase [EC:2.5.1.18]; K00799	PREDICTED: glutathione S-transferase 1-1-like [Plutella xylostella]
LOC105391501	6.32	2.19	0.93	6.9	10.03	4.92	-1.92759	0.012025	GST, gst; glutathione S-transferase [EC:2.5.1.18]; K00799; SE; pyrimidodiazepine synthase [EC:1.5.4.1]; K00310	PREDICTED: glutathione S-transferase [EC:2.5.1.18];pyrimidodiazepine synthase-like [Plutella xylostella]
LOC105388560	201.55	189.04	194.08	303.34	242.99	273.59	-1.24221	0.0252461	GST, gst; glutathione S-transferase [EC:2.5.1.18]; K00799	PREDICTED: glutathione S-transferase [EC:2.5.1.18]; LOC105388560 [Plutella xylostella]
LOC105389660	0.72	0.53	0	33.59	32.59	43.43	-7.07403	1.91026e-19	ACHE; acetylcholinesterase [EC:3.1.1.7]; K01049	PREDICTED: acetylcholinesterase [EC:3.1.1.7];esterase FE4-like [Plutella xylostella]
LOC105389647	6.96	8.51	3.98	239.88	156.31	265.45	-5.87743	3.87338e-18	ACHE; acetylcholinesterase [EC:3.1.1.7]; K01049	PREDICTED:acetylcholinesterase [EC:3.1.1.7]: esterase FE4-like [Plutella xylostella]
LOC105391968	1.75	0.98	0	39.99	35.65	49.63	-6.17759	2.40384e-15	ACHE; acetylcholinesterase [EC:3.1.1.7]; K01049	PREDICTED: acetylcholinesterase [EC:3.1.1.7];cholinesterase-like, partial [Plutella xylostella]
LOC105398502	9.77	7.45	2.21	186.85	93.23	147.66	-5.28029	3.35227e-13	ACHE; acetylcholinesterase [EC:3.1.1.7]; K01049	PREDICTED: acetylcholinesterase-like [Plutella xylostella]
LOC105391967	9.2	7.02	0.73	100.21	164.91	197.96	-5.53521	5.89138e-12	ACHE; acetylcholinesterase [EC:3.1.1.7]; K01049	PREDICTED: acetylcholinesterase [EC:3.1.1.7];bile salt-activated lipase-like, partial [Plutella xylostella]
LOC105393145	1.47	3.98	0.61	42.38	14.9	49.2	-4.9238	7.56617e-09	ACHE; acetylcholinesterase [EC:3.1.1.7]; K01049	PREDICTED: acetylcholinesterase-like [Plutella xylostella]
LOC105382840	35.97	49.4	12.76	221.67	55.93	232.13	-3.23662	3.53131e-05	ACHE; acetylcholinesterase [EC:3.1.1.7]; K01049	PREDICTED: acetylcholinesterase [EC:3.1.1.7];venom carboxylesterase-6-like [Plutella xylostella]
LOC105397411	1.48	4.9	0.44	14.55	6.91	22.86	-3.49466	8.03556e-05	ACHE; acetylcholinesterase [EC:3.1.1.7]; K01049	PREDICTED: acetylcholinesterase [EC:3.1.1.7]; carboxylesterase 5A-like [Plutella xylostella]
LOC105397896	22.14	3.62	5.03	499.45	450.66	395.55	-6.26791	8.95754e-15	carboxylesterase 1 [EC:3.1.1.1];CES1; K01044	PREDICTED: juvenile hormone esterase-like [Plutella xylostella]
LOC105390385	1.73	2.29	0.76	53.65	12.94	39.28	-5.27493	3.38055e-11	carboxylesterase 1 [EC:3.1.1.1]; K01044;CES1;	PREDICTED: juvenile hormone esterase-like [Plutella xylostella]
LOC105387913	11.31	10.72	2.91	80.79	90.72	110.98	-4.28895	8.14699e-11	carboxylesterase 1 [EC:3.1.1.1]; ;CES1; K01044	PREDICTED: juvenile hormone esterase-like, partial [Plutella xylostella]
LOC105387900	10.73	7.15	3.47	31.46	36.15	30.85	-2.9726	3.62144e-07	carboxylesterase 1E-like; CEL; bile salt-stimulated lipase [EC:3.1.1.3 3.1.1.13]; K12298	PREDICTED: carboxylesterase 1E-like [Plutella xylostella]
LOC105383420	1.1	0.84	0.76	1.86	3.07	3.46	-2.38252	0.000665601	CES1; carboxylesterase 1 [EC:3.1.1.1]; K01044; NLGN; neuroligin; K07378	PREDICTED: neuroligin-4, Y-linked-like [Plutella xylostella]
LOC105387487	0.22	0.23	0.12	0.91	1.24	0.67	-2.93062	0.000675013	NA	PREDICTED: venom carboxylesterase-6-like [Plutella xylostella]
LOC105392006	136.84	216.79	76.79	397.26	218.05	411.85	-2.06319	0.00120769	NA	PREDICTED: venom carboxylesterase-6-like [Plutella xylostella]
LOC105389961	65.48	86.56	95.66	177.77	267.22	236.5	-2.16694	9.84593e-05	ATPeF0E, ATP5I; F-type H+-transporting ATPase subunit e; K02129	PREDICTED: ATP synthase subunit e, mitochondrial-like [Plutella xylostella]
LOC105384612	272.51	474.18	463.76	859.79	1076.74	908.13	-1.93204	0.000625399	ATPeF1G, ATP5C1, ATP3; F-type H+-transporting ATPase subunit gamma; K02136	PREDICTED: ATP synthase subunit gamma, mitochondrial [Plutella xylostella]
LOC105386388	115.22	182.98	134.48	308.72	326.35	311.94	-1.85912	0.00074223	ATPeF0B, ATP5F1, ATP4; F-type H+-transporting ATPase subunit b; K02127	PREDICTED: ATP synthase subunit b, mitochondrial-like [Plutella xylostella]
LOC105394284	113.83	154.62	230.94	578.06	337.67	344.92	-2.05521	0.000813421	ATPeF0F, ATP5J2; F-type H+-transporting ATPase subunit f; K02130	PREDICTED: putative ATP synthase subunit f, mitochondrial [Plutella xylostella]
LOC105384385	286.04	439.72	441.62	822.63	938.16	799.21	-1.83905	0.000921017	ATPeF1B, ATP5B, ATP2; F-type H+-transporting ATPase subunit beta [EC:7.1.2.2]; K02133	PREDICTED: ATP synthase subunit beta, mitochondrial-like [Plutella xylostella]
LOC105387111	169.88	212.94	131.9	318.7	317.09	412.52	-1.79455	0.00125584	ATPeF0B, ATP5F1, ATP4; F-type H+-transporting ATPase subunit b; K02127	PREDICTED: ATP synthase subunit b, mitochondrial-like [Plutella xylostella]
LOC105386078	2.47	0.67	0.28	219.2	312.77	231.44	-8.47568	1.44428e-26	PRSS1_2_3; trypsin [EC:3.4.21.4]; K01312	PREDICTED: trypsin, alkaline B-like [Plutella xylostella]
LOC105386722	6.46	4.36	0.74	559.19	626.51	603.96	-8.00196	7.41871e-24	PRSS1_2_3; trypsin [EC:3.4.21.4]; K01312	PREDICTED: trypsin, alkaline B-like, partial [Plutella xylostella]
LOC105391879	4.85	1.49	0.54	420.15	375.49	491.72	-8.32113	9.93335e-23	PRSS1_2_3; trypsin [EC:3.4.21.4]; K01312	PREDICTED: trypsin, alkaline B-like [Plutella xylostella]
LOC105386077	180.08	180.92	83.46	5230.63	4410.91	4688.76	-5.79193	1.5064e-19	PRSS1_2_3; trypsin [EC:3.4.21.4]; K01312	PREDICTED: trypsin, alkaline C-like [Plutella xylostella]
LOC105386250	1.72	2.6	0.77	85	66.2	95.49	-6.33331	3.57865e-19	PRSS1_2_3; trypsin [EC:3.4.21.4]; K01312	PREDICTED: trypsin, alkaline C-like isoform X2 [Plutella xylostella]
LOC105388679	2.99	3.63	0.31	188.43	151.53	161.3	-6.86781	8.64536e-19	PRSS1_2_3; trypsin [EC:3.4.21.4]; K01312	PREDICTED: trypsin, alkaline A-like [Plutella xylostella]
LOC105385640	0.39	0.1	0	21.78	19.52	14.86	-7.29636	6.28288e-18	PRSS1_2_3; trypsin [EC:3.4.21.4]; K01312	PREDICTED: trypsin, alkaline C-like [Plutella xylostella]
LOC105390846	0.18	0.64	0.13	19.93	34.82	13.1	-6.65374	4.42783e-18	NA	PREDICTED: facilitated trehalose transporter Tret1-like [Plutella xylostella]
LOC105389237	0.84	0.68	0.44	21.17	19.24	12.6	-5.44378	2.0347e-16	NA	PREDICTED: facilitated trehalose transporter Tret1-2 homolog, partial [Plutella xylostella]
LOC105395363	0.46	0.48	0.41	19.35	30.01	8.31	-6.05976	2.46888e-16	NA	PREDICTED: facilitated trehalose transporter Tret1-like [Plutella xylostella]
LOC105394057	17.73	13.18	18.42	182.86	302.57	135.03	-4.32962	1.47137e-13	NA	PREDICTED: facilitated trehalose transporter Tret1-like [Plutella xylostella]
LOC105390847	2.59	3.11	0.82	34.29	39.12	28.95	-4.68685	4.18704e-13	NA	PREDICTED: facilitated trehalose transporter Tret1-like [Plutella xylostella]
LOC105382737	1.93	1.79	0.44	22.65	16.8	17.29	-4.48922	1.40355e-11	NA	PREDICTED: facilitated trehalose transporter Tret1-2 homolog [Plutella xylostella]
LOC105380778	13.68	12.08	7.08	82.16	118.59	71.11	-3.77016	1.72334e-11	NA	PREDICTED: facilitated trehalose transporter Tret1-like [Plutella xylostella]
LOC105396667	1.88	2.26	1	10.62	23.15	18.61	-4.04553	5.1333e-11	NA	PREDICTED: facilitated trehalose transporter Tret1-like [Plutella xylostella]
LOC105387744	10.22	13.05	3.64	120.89	79.28	90.91	-4.22139	1.2538e-10	NA	PREDICTED: facilitated trehalose transporter Tret1 [Plutella xylostella]
LOC105395367	0.75	2.34	0.26	23.65	50.32	12.34	-5.20141	1.63042e-10	NA	PREDICTED: facilitated trehalose transporter Tret1-like [Plutella xylostella]
LOC105394840	18.48	24.94	15.07	47.46	73.97	54.5	-2.29986	2.47956e-05	NDUFA8; NADH dehydrogenase (ubiquinone) 1 alpha subcomplex subunit 8; K03952	PREDICTED: NADH dehydrogenase [ubiquinone] 1 alpha subcomplex subunit 8-like [Plutella xylostella]
LOC105397921	15.46	17.95	7.16	31.55	51.39	29.49	-2.18749	0.000121144	NDUFV1; NADH dehydrogenase (ubiquinone) flavoprotein 1 [EC:7.1.1.2 1.6.99.3]; K03942	PREDICTED: NADH dehydrogenase [ubiquinone] flavoprotein 1, mitochondrial [Plutella xylostella]
LOC105391039	0.89	1.81	0.37	3.59	6.3	3.85	-2.77919	0.000154804	NDUFAF3; NADH dehydrogenase [ubiquinone] 1 alpha subcomplex assembly factor 3; K09008	PREDICTED: NADH dehydrogenase [ubiquinone] 1 alpha subcomplex assembly factor 3-like [Plutella xylostella]
LOC105386172	76.61	101.13	93.44	188.16	215.96	208.32	-1.90077	0.000470053	NDUFA9; NADH dehydrogenase (ubiquinone) 1 alpha subcomplex subunit 9; K03953	PREDICTED: NADH dehydrogenase [ubiquinone] 1 alpha subcomplex subunit 9, mitochondrial [Plutella xylostella]
LOC105383423	46.16	62.1	51.42	90.31	137.35	120.42	-1.84133	0.000688294	NDUFA10; NADH dehydrogenase (ubiquinone) 1 alpha subcomplex subunit 10; K03954	PREDICTED: NADH dehydrogenase [ubiquinone] 1 alpha subcomplex subunit 10, mitochondrial-like [Plutella xylostella]
LOC105388708	89.33	101.14	141.57	233.96	206.86	265.86	-1.82647	0.00150585	NDUFB2; NADH dehydrogenase (ubiquinone) 1 beta subcomplex subunit 2; K03958	PREDICTED: NADH dehydrogenase [ubiquinone] 1 beta subcomplex subunit 2, mitochondrial-like [Plutella xylostella]
LOC105396501	96.8	106.56	84.21	241.7	135.43	205.82	-1.80056	0.00170816	NDUFB7; NADH dehydrogenase (ubiquinone) 1 beta subcomplex subunit 7; K03963	PREDICTED: NADH dehydrogenase [ubiquinone] 1 beta subcomplex subunit 7-like [Plutella xylostella]
LOC105391185	175.19	174.08	194.96	326.61	378.54	333.28	-1.65582	0.00186849	NDUFB11; NADH dehydrogenase (ubiquinone) 1 beta subcomplex subunit 11; K11351	PREDICTED: NADH dehydrogenase [ubiquinone] 1 beta subcomplex subunit 11, mitochondrial [Plutella xylostella]
LOC105385341	92.04	91.8	71.42	123.35	185.82	140.1	-1.53966	0.00351015	NDUFA10; NADH dehydrogenase (ubiquinone) 1 alpha subcomplex subunit 10; K03954	PREDICTED: NADH dehydrogenase [ubiquinone] 1 alpha subcomplex subunit 10, mitochondrial-like [Plutella xylostella]
LOC105391531	87.81	86.2	65.13	134.83	112.61	158.84	-1.54393	0.0054602	NDUFV2; NADH dehydrogenase (ubiquinone) flavoprotein 2 [EC:7.1.1.2 1.6.99.3]; K03943	PREDICTED: NADH dehydrogenase [ubiquinone] flavoprotein 2, mitochondrial [Plutella xylostella]
LOC105384362	85.36	92.21	84.06	137.67	154.34	137.23	-1.44559	0.00686392	NDUFB7; NADH dehydrogenase (ubiquinone) 1 beta subcomplex subunit 7; K03963	PREDICTED: NADH dehydrogenase [ubiquinone] 1 beta subcomplex subunit 7-like [Plutella xylostella]
LOC105381640	117.9	107.54	142.49	172.56	216.27	205.68	-1.41516	0.00962725	NDUFS7; NADH dehydrogenase (ubiquinone) Fe-S protein 7 [EC:7.1.1.2 1.6.99.3]; K03940	PREDICTED: NADH dehydrogenase [ubiquinone] iron-sulfur protein 7, mitochondrial [Plutella xylostella]
LOC105392901	3.64	3.85	2.32	181.06	118.24	274.18	-6.63867	8.13186e-19	aminopeptidase N [EC:3.4.11.2];ANPEP, CD13; aminopeptidase N [EC:3.4.11.2]; K11140	PREDICTED: membrane alanyl aminopeptidase-like [Plutella xylostella]
LOC105390989	2.65	1.72	2.27	87.52	31.84	121.09	-6.01404	8.38032e-15	aminopeptidase N [EC:3.4.11.2];ANPEP, CD13; K11140	PREDICTED: membrane alanyl aminopeptidase-like [Plutella xylostella]
LOC105386580	14.76	25.02	4.82	274.49	264.36	397.6	-5.18987	2.49805e-12	aminopeptidase N [EC:3.4.11.2];ANPEP, CD13; K11140	PREDICTED: aminopeptidase N [Plutella xylostella]
LOC105393000	23.41	36.01	13.82	354.73	180.65	381.92	-4.45965	5.02985e-11	aminopeptidase N [EC:3.4.11.2];ANPEP, CD13; K11140	PREDICTED: membrane alanyl aminopeptidase-like [Plutella xylostella]
LOC105390988	14.57	18.81	5.35	229.28	104.71	299.5	-4.87303	9.37764e-11	aminopeptidase N [EC:3.4.11.2];ANPEP, CD13; K11140	PREDICTED: membrane alanyl aminopeptidase-like [Plutella xylostella]
LOC105386349	17.21	19.43	4.4	225.06	112.26	310.33	-4.83257	4.33886e-10	aminopeptidase N [EC:3.4.11.2];ANPEP, CD13; K11140	PREDICTED: membrane alanyl aminopeptidase-like [Plutella xylostella]
LOC105386579	10.25	18.9	7.32	106.67	80.4	110.24	-3.80105	1.37076e-09	aminopeptidase N [EC:3.4.11.2];ANPEP, CD13; K11140	PREDICTED: aminopeptidase N-like [Plutella xylostella]
LOC105384013	36.82	39.71	8.42	289.27	269.96	238.05	-4.01677	3.04481e-09	NA	PREDICTED: cadherin-87A-like [Plutella xylostella]
LOC105398335	2.47	1.42	0.99	3.31	5.45	3.2	-2.01537	0.000579041	NA	PREDICTED: DE-cadherin-like [Plutella xylostella]
LOC105389471	2.09	1.24	0.6	1.67	3.03	2.04	-1.51208	0.019267	NA	PREDICTED: DE-cadherin-like [Plutella xylostella]
LOC105383493	0.21	0.23	0.44	19.05	19.69	10.38	-6.60447	5.34867e-18	chitinase [EC:3.2.1.14];E3.2.1.14; K01183	PREDICTED: chitotriosidase-1-like [Plutella xylostella]
LOC105381408	0.29	0	0	13.16	11.65	13.55	-7.56189	3.64228e-17	chitinase [EC:3.2.1.14];E3.2.1.14; K01183	PREDICTED: chitotriosidase-1-like [Plutella xylostella]
LOC105389954	7.36	9.55	6.15	61.91	62.55	69.92	-3.82994	1.59041e-11	ABCC4; ATP-binding cassette, subfamily C (CFTR/MRP), member 4; K05673	PREDICTED: multidrug resistance-associated protein 4-like isoform X3 [Plutella xylostella]
LOC105388339	2.55	3.56	2.13	17.09	14.6	14.85	-3.2434	1.12387e-08	ABCC4; ATP-binding cassette, subfamily C (CFTR/MRP), member 4; K05673	PREDICTED: multidrug resistance-associated protein 4-like [Plutella xylostella]
LOC105388338	16.2	19.23	17.85	81.94	66.58	103.52	-3.00892	1.77079e-07	ABCC4; ATP-binding cassette, subfamily C (CFTR/MRP), member 4; K05673	PREDICTED: multidrug resistance-associated protein 4-like [Plutella xylostella]
LOC105382849	0.9	1.43	0.27	3.69	5	8.92	-3.5183	1.6418e-06	ABCC10; ATP-binding cassette, subfamily C (CFTR/MRP), member 10; K05674	PREDICTED: multidrug resistance-associated protein 7-like [Plutella xylostella]
LOC105386992	19.62	26.2	8.26	69.23	61.1	90.27	-2.82637	5.66151e-06	ABCC4; ATP-binding cassette, subfamily C (CFTR/MRP), member 4; K05673	PREDICTED: probable multidrug resistance-associated protein lethal(2)03659 [Plutella xylostella]
LOC105386683	0.38	0.65	0	2.05	5.79	1.3	-3.66477	4.67359e-05	ABCC10; ATP-binding cassette, subfamily C (CFTR/MRP), member 10; K05674	PREDICTED: multidrug resistance-associated protein 7-like [Plutella xylostella]
LOC105391710	3.27	3.63	1.86	6.4	11.39	7.57	-2.24798	5.47624e-05	ABCC1; ATP-binding cassette, subfamily C (CFTR/MRP), member 1 [EC:7.6.2.3]; K05665	PREDICTED: multidrug resistance-associated protein 1 isoform X4 [Plutella xylostella]
LOC105387104	2.08	2.7	0.77	6.17	6.75	6.47	-2.51957	0.000115679	ABCC10; ATP-binding cassette, subfamily C (CFTR/MRP), member 10; K05674	PREDICTED: multidrug resistance-associated protein 7-like [Plutella xylostella]
LOC105387880	1.94	2.9	0.26	5.12	12.43	4.44	-2.76439	0.000347173	ABCC4; ATP-binding cassette, subfamily C (CFTR/MRP), member 4; K05673	PREDICTED: multidrug resistance-associated protein 4-like [Plutella xylostella]
LOC105387094	18.89	18.11	5.21	48.64	23.16	32.46	-2.11949	0.00145802	ABCC10; ATP-binding cassette, subfamily C (CFTR/MRP), member 10; K05674	PREDICTED: bile pigment transporter 1-like [Plutella xylostella]
LOC105386993	6.35	25.81	0.95	58.32	39.43	45.31	-2.88958	0.00241663	ABCC4; ATP-binding cassette, subfamily C (CFTR/MRP), member 4; K05673	PREDICTED: probable multidrug resistance-associated protein lethal(2)03659 [Plutella xylostella]
LOC105397360	11.85	10.57	2.24	9.64	25.89	7	-1.46303	0.0447775	ABCC4; ATP-binding cassette, subfamily C (CFTR/MRP), member 4; K05673	PREDICTED: probable multidrug resistance-associated protein lethal(2)03659, partial [Plutella xylostella]
LOC105396404	1.82	1.14	0.49	2.46	7.32	3.03	-2.54793	0.000348982	GALNT; polypeptide N-acetylgalactosaminyltransferase [EC:2.4.1.41]; K00710	PREDICTED: N-acetylgalactosaminyltransferase 5-like isoform X2 [Plutella xylostella]
LOC105383248	6.2	3.17	1.87	8.58	9.88	7.97	-1.99693	0.000972208	GALNT; polypeptide N-acetylgalactosaminyltransferase [EC:2.4.1.41]; K00710	PREDICTED: N-acetylgalactosaminyltransferase 7 [Plutella xylostella]
LOC105396281	153.79	164.55	77.93	1189.11	780.75	2405.04	-4.30765	1.02268e-09	(GABA receptor modulator, acyl-CoA-binding protein);DBI, ACBP; diazepam-binding inhibitor K08762	PREDICTED: putative acyl-CoA-binding protein [Plutella xylostella]
LOC105383119	71.35	126.89	36.78	848.05	314.36	805.18	-3.88812	8.35212e-08	(GABA receptor modulator, acyl-CoA-binding protein);DBI, ACBP; diazepam-binding inhibitor ; K08762	PREDICTED: putative acyl-CoA-binding protein [Plutella xylostella]
LOC105397186	210.94	382.6	106.45	1674.44	684.76	1756.95	-3.38185	2.27044e-06	(GABA receptor modulator, acyl-CoA-binding protein);DBI, ACBP; diazepam-binding inhibitor; K08762	PREDICTED: putative acyl-CoA-binding protein [Plutella xylostella]
LOC105397185	17.52	14.19	1.07	74.4	59.5	97.25	-3.58973	3.93226e-06	(GABA receptor modulator, acyl-CoA-binding protein);DBI, ACBP; diazepam-binding inhibitor ; K08762	PREDICTED: acyl-CoA-binding protein homolog [Plutella xylostella]
LOC105383121	345.67	293.45	327.36	1094.2	764.88	1326.42	-2.50378	1.28946e-05	(GABA receptor modulator, acyl-CoA-binding protein);DBI, ACBP; diazepam-binding inhibitor ; K08762	PREDICTED: acyl-CoA-binding protein homolog [Plutella xylostella]
LOC105392640	0.13	0.14	0.11	0.05	0.89	0.26	-2.25428	0.0216391	RYR2; ryanodine receptor 2; K04962	PREDICTED: ryanodine receptor 44F-like [Plutella xylostella]
LOC105398438	51.72	67.17	18.1	626.99	265.92	1360.83	-4.91662	5.89965e-09	katE, CAT, catB, srpA; catalase [EC:1.11.1.6]; K03781	PREDICTED: catalase-like [Plutella xylostella]
LOC105390515	145.59	113.58	57.96	637.22	422.93	793.53	-3.37574	5.33549e-08	katE, CAT, catB, srpA; catalase [EC:1.11.1.6]; K03781	PREDICTED: catalase-like [Plutella xylostella]
LOC105380657	7.37	4.42	0.86	18.88	16.28	33.04	-3.26657	1.5461e-05	E3.1.3.1, phoA, phoB; alkaline phosphatase [EC:3.1.3.1]; K01077	PREDICTED: alkaline phosphatase, tissue-nonspecific isozyme-like [Plutella xylostella]
LOC105388506	0	0	0.13	38.3	7.87	70.78	-11.0822	1.16859e-15	UGT; glucuronosyltransferase [EC:2.4.1.17]; K00699	PREDICTED: UDP-glucuronosyltransferase 2B18-like [Plutella xylostella]
LOC105389450	0	0	0	18	3.64	29.38	-11.8642	1.98029e-14	UGT; glucuronosyltransferase [EC:2.4.1.17]; K00699	PREDICTED: UDP-glucuronosyltransferase 2B18-like isoform X2 [Plutella xylostella]
LOC105383409	1.86	1.91	1.13	33.45	13.82	30.89	-4.79269	2.96362e-12	UGT; glucuronosyltransferase [EC:2.4.1.17]; K00699	PREDICTED: UDP-glucuronosyltransferase 2B15-like [Plutella xylostella]
LOC105380066	4.75	5.83	2.61	44.35	31.83	37.35	-3.86506	1.91202e-10	UGT; glucuronosyltransferase [EC:2.4.1.17]; K00699	PREDICTED: UDP-glucuronosyltransferase 2B1-like [Plutella xylostella]
LOC105389540	0.39	1.42	0.4	18.32	6.31	13.18	-4.81758	2.16193e-09	UGT; glucuronosyltransferase [EC:2.4.1.17]; K00699	PREDICTED: UDP-glucuronosyltransferase 2B15-like [Plutella xylostella]
LOC105380067	6.76	5.87	2.48	44.24	28.23	25.63	-3.47284	1.86281e-08	UGT; glucuronosyltransferase [EC:2.4.1.17]; K00699	PREDICTED: UDP-glucuronosyltransferase 2B1-like [Plutella xylostella]
LOC105383040	9.05	14.38	10.32	83.87	37.1	75.69	-3.32767	1.68893e-07	UGT; glucuronosyltransferase [EC:2.4.1.17]; K00699	PREDICTED: UDP-glucuronosyltransferase-like [Plutella xylostella]
LOC105393950	2.69	4.95	2.36	16.58	8.65	18.43	-2.91047	7.39783e-06	UGT; glucuronosyltransferase [EC:2.4.1.17]; K00699	PREDICTED: UDP-glucuronosyltransferase 2C1-like [Plutella xylostella]
LOC105392923	21.55	45.78	36.11	190.22	137.1	30.68	-1.93165	0.0278232	NA	PREDICTED: mitochondrial sodium/hydrogen exchanger 9B2-like isoform X3 [Plutella xylostella]
LOC105395095	1928.83	1703.23	1318.64	2785.97	5157.98	3618.52	-1.57628	0.0364401	NA	PREDICTED: serine protease inhibitor dipetalogastin-like [Plutella xylostella]
LOC105394289	14.32	5.09	1.44	28.31	5.24	47.93	-2.58209	0.0456707	NA	PREDICTED: collagenase-like [Plutella xylostella]

## Sheet: FOH vs SS
	Table S3 The differentially expressed genes between field high resistant (FOH-DBM) and susceptible strain (SS-DBM) of Plutelle xylostella
			FOH-DBM vs SS-DBM
			Up-regulated
Gene	FOH-DBM_1	FOH-DBM_2	FOH-DBM_3	SS-DBM_1	SS-DBM_2	SS-DBM_3	logFC	FDR	KEGG	NR
LOC105387501	3.35	6.05	2.49	0.13	0.08	0.08	4.81211	9.16254e-07	SAD, CYP315A1; ecdysteroid 2-hydroxylase; K10722	PREDICTED: cytochrome P450 315a1, mitochondrial-like isoform X2 [Plutella xylostella]
LOC105382179	7.6	1.28	1.84	0.04	0.24	0.04	4.64853	0.000116551	NA	PREDICTED: cytochrome P450 6B1-like [Plutella xylostella]
LOC105389044	15.43	22.67	5.47	0.23	1.94	0.05	3.95453	0.000117345	NA	PREDICTED: cytochrome P450 4g15-like [Plutella xylostella]
LOC105391921	19.25	0	0.65	0	0	0	9.40399	0.000330579	TBXAS1, CYP5A; thromboxane-A synthase [EC:5.3.99.5]; K01832	PREDICTED: cytochrome P450 6B4-like [Plutella xylostella]
LOC105397321	11.31	27.61	4.53	0.25	1.51	1.6	3.15825	0.000360462	NA	PREDICTED: cytochrome P450 6k1-like [Plutella xylostella]
LOC105398192	24.48	13.08	4.02	0.17	3.01	0.72	3.05472	0.00178608	NA	PREDICTED: cytochrome P450 301a1, mitochondrial [Plutella xylostella]
LOC105397406	15.32	27.82	4.52	0.2	3.01	0	3.5474	0.00261879	NA	PREDICTED: cytochrome P450 4V2-like, partial [Plutella xylostella]
LOC105381130	16.34	42.36	4.41	0	3.25	1.12	3.3828	0.00307339	NA	PREDICTED: cytochrome P450 4C1-like [Plutella xylostella]
LOC105381026	13.49	6.05	0	0.07	0.79	0.17	3.80579	0.00384517	NA	PREDICTED: cytochrome P450 4V2-like [Plutella xylostella]
LOC105387052	0.71	2.04	0	0	0	0	6.57309	0.00602189	NA	PREDICTED: cytochrome P450 4C1, partial [Plutella xylostella]
LOC105391053	85.06	97.14	56.3	6.24	32.74	10.3	1.96294	0.00894906	NA	PREDICTED: cytochrome P450 4g15 [Plutella xylostella]
LOC105380105	79.18	135.96	42.71	2.75	32.68	4.9	2.35298	0.011302	NA	PREDICTED: cytochrome P450 4g15-like [Plutella xylostella]
LOC105389425	5.89	13.35	2.06	0.18	2.12	0.05	2.83797	0.0189081	NA	PREDICTED: cytochrome P450 4g15-like [Plutella xylostella]
LOC105398353	1.16	3.5	0	0	0.19	0.15	3.32941	0.0215226	NA	PREDICTED: cytochrome P450 4C1-like [Plutella xylostella]
LOC105392138	7.03	11.37	0	0	0	0	7.88817	0.00013633	GST, gst; glutathione S-transferase [EC:2.5.1.18]; K00799	PREDICTED: glutathione S-transferase 1-like [Plutella xylostella]
LOC105389468	1.94	3.13	0	0.04	0.24	0.04	3.57487	0.00720774	NA	PREDICTED: acetylcholinesterase [Plutella xylostella]
LOC105393541	5.32	0.28	0.86	0.03	0.06	0	5.68225	0.00030346	ATPeF1B, ATP5B, ATP2; F-type H+-transporting ATPase subunit beta [EC:7.1.2.2]; K02133	PREDICTED: ATP synthase subunit beta, mitochondrial-like [Plutella xylostella]
LOC105386120	3.01	3.51	1.89	0	0	0	6.67477	0.00108515	ATPeFG, ATP5L, ATP20; F-type H+-transporting ATPase subunit g; K02140	PREDICTED: ATP synthase subunit g, mitochondrial-like [Plutella xylostella]
LOC105382346	1.81	4.79	1.51	0.2	0.29	0	3.52551	0.00532059	ATPeF0D, ATP5H, ATP7; F-type H+-transporting ATPase subunit d; K02138	PREDICTED: ATP synthase subunit d, mitochondrial-like [Plutella xylostella]
LOC105394168	9.38	20.4	1.42	0	1.19	0.19	4.05511	0.000333776	NA	PREDICTED: trypsin II-P29-like [Plutella xylostella]
LOC105390678	0.75	2.06	0.94	0	0.06	0	4.93092	0.00198282	PRSS1_2_3; trypsin [EC:3.4.21.4]; K01312	PREDICTED: trypsin CFT-1-like [Plutella xylostella]
LOC105384235	1.5	3.09	0	0	0.12	0	4.61668	0.00266443	NA	PREDICTED: trypsin alpha-4-like [Plutella xylostella]
LOC105392860	4.9	7.54	0	0.16	0.38	0	4.07392	0.00300907	PRSS1_2_3; trypsin [EC:3.4.21.4]; K01312	PREDICTED: trypsin CFT-1-like [Plutella xylostella]
LOC105383118	10.61	6.7	45.08	1.4	5.89	1.03	2.92449	0.00976472	PRSS1_2_3; trypsin [EC:3.4.21.4]; K01312	PREDICTED: trypsin-1-like [Plutella xylostella]
LOC105388354	4.8	2.63	0	0.12	0.6	0	3.0258	0.0419142	PRSS1_2_3; trypsin [EC:3.4.21.4]; K01312	PREDICTED: trypsin; LOC105388354 [Plutella xylostella]
LOC105398359	2.31	2.36	1.05	0	0.34	0.07	3.40835	0.00131127	NA	PREDICTED: facilitated trehalose transporter Tret1-like [Plutella xylostella]
LOC105395206	17.42	25.62	7.18	0.37	2.03	3.32	2.59305	0.00249781	NA	PREDICTED: facilitated trehalose transporter Tret1-like [Plutella xylostella]
LOC105384202	5.2	0.32	2.95	0.23	0.16	0	4.07933	0.00379607	NA	PREDICTED: facilitated trehalose transporter Tret1-like [Plutella xylostella]
LOC105386036	2.39	0.95	0	0	0.21	0.05	3.31151	0.0272663	NA	PREDICTED: facilitated trehalose transporter Tret1-like [Plutella xylostella]
LOC105393819	1.11	3.15	0.46	0.03	0.57	0.06	2.49555	0.0472909	NA	PREDICTED: facilitated trehalose transporter Tret1-like [Plutella xylostella]
LOC105384651	5.36	4.65	2.24	0.3	0	0	4.63479	0.000254597	NDUFB9; NADH dehydrogenase (ubiquinone) 1 beta subcomplex subunit 9; K03965	PREDICTED: NADH dehydrogenase [ubiquinone] 1 beta subcomplex subunit 9-like [Plutella xylostella]
LOC105387955	6.74	13.54	2.25	0	1.02	0	4.04717	0.000491779	NDUFS5; NADH dehydrogenase (ubiquinone) Fe-S protein 5; K03938	PREDICTED: NADH dehydrogenase [ubiquinone] iron-sulfur protein 5-like [Plutella xylostella]
LOC105388945	2.69	18.18	0	0.15	0.87	0.31	3.48519	0.0170807	NDUFB4; NADH dehydrogenase (ubiquinone) 1 beta subcomplex subunit 4; K03960	PREDICTED: NADH dehydrogenase (ubiquinone) 1 ; LOC105388945 [Plutella xylostella]
LOC105392372	2.23	1.88	1.01	0	0	0.35	3.29116	0.0222728	NDUFV2; NADH dehydrogenase (ubiquinone) flavoprotein 2 [EC:7.1.1.2 1.6.99.3]; K03943	PREDICTED: NADH dehydrogenase [ubiquinone] flavoprotein 2, mitochondrial [Plutella xylostella]
LOC105380216	1.23	2.25	0	0	0.27	0	3.33053	0.0313314	NDUFS1; NADH dehydrogenase (ubiquinone) Fe-S protein 1 [EC:7.1.1.2 1.6.99.3]; K03934	PREDICTED: NADH dehydrogenase (ubiquinone) oxidoreductase 75 kDa subunit, mitochondrial-like [Plutella xylostella]
LOC105386486	1.48	1.11	1.17	0	0	0	7.75739	1.13294e-05	NA	PREDICTED: glutamate receptor ionotropic, delta-1-like [Plutella xylostella]
LOC105391323	0.39	0.47	1.17	0	0.05	0	4.40132	0.00224993	NA	PREDICTED: glutamate receptor 2-like [Plutella xylostella]
LOC105386287	0.45	0.45	0.37	0.05	0.02	0	3.3977	0.0143422	NA	PREDICTED: glutamate receptor ionotropic, kainate 2 [Plutella xylostella]
LOC105383392	80.96	78.85	25.16	1.79	12.89	4.11	2.91026	0.000306402	NA	PREDICTED: serpin B13 isoform X2 [Plutella xylostella]
LOC105390553	5.28	7.68	0.83	0.11	0.64	0.23	3.40319	0.000663792	SERPINB; serpin B; K13963	PREDICTED: plasminogen activator inhibitor 1-like [Plutella xylostella]
LOC105387001	125.65	58.93	30.46	3.83	25.58	5.64	2.28489	0.00800784	SERPINB; serpin B; K13963	PREDICTED: serpin B3-like [Plutella xylostella]
LOC105396589	76.1	45.7	10.68	1.34	12.98	5.1	2.35954	0.0093393	SERPINB; serpin B; K13963	PREDICTED: serpin B6-like, partial [Plutella xylostella]
LOC105387668	2.6	4.74	0.72	0.24	0.79	0.1	2.47784	0.0179491	SERPINB; serpin B; K13963	PREDICTED: serpin B5-like [Plutella xylostella]
LOC105383414	48.21	77.06	14.58	4.02	19.87	4.6	1.87332	0.0223987	SERPINB; serpin B; K13963	PREDICTED: antichymotrypsin-2-like [Plutella xylostella]
LOC105390554	3.9	10.29	0	0.32	0.99	0.32	2.63374	0.0258369	SERPINB; serpin B; K13963	PREDICTED: serpin B8-like [Plutella xylostella]
LOC105390552	54.77	63.57	12.86	2.89	20.19	3.09	1.94634	0.028907	SERPINB; serpin B; K13963	PREDICTED: serine protease inhibitor 2.1-like [Plutella xylostella]
LOC105390551	57.9	81.67	21.57	7.75	25.44	8.63	1.51852	0.0394031	SERPINB; serpin B; K13963	PREDICTED: leukocyte elastase inhibitor-like [Plutella xylostella]
LOC105390728	2.35	2.57	0.73	0.14	0.58	0.14	2.3512	0.00239942	chitinase [EC:3.2.1.14];E3.2.1.14; K01183	PREDICTED: mucin-5AC isoform X2 [Plutella xylostella]
LOC105385326	21.9	18.81	3	0.81	4.72	0.61	2.43933	0.00781068	chitinase [EC:3.2.1.14];E3.2.1.14; K01183	PREDICTED: probable chitinase 3 [Plutella xylostella]
LOC105389028	34.97	5.52	1.48	1.1	4.24	0.14	2.58826	0.0434265	chitinase [EC:3.2.1.14];E3.2.1.14; K01183	PREDICTED: endochitinase [Plutella xylostella]
LOC105398071	1.89	2.41	0.79	0.21	0.25	0.11	2.72202	0.00857348	B4GALT1; beta-1,4-galactosyltransferase 1 [EC:2.4.1.22 2.4.1.90 2.4.1.38 2.4.1.-]; K07966; B4GALT2; beta-1,4-galactosyltransferase 2 [EC:2.4.1.22 2.4.1.90 2.4.1.38 2.4.1.-]; K07967	PREDICTED: beta-1,4-N-acetylgalactosaminyltransferase bre-4-like [Plutella xylostella]
LOC105381129	1.07	2.65	0	0	0.28	0	3.37152	0.0287118	GALNT; polypeptide N-acetylgalactosaminyltransferase [EC:2.4.1.41]; K00710	PREDICTED: polypeptide N-acetylgalactosaminyltransferase 1-like [Plutella xylostella]
LOC105396079	1.65	1.09	1.65	0	0.11	0.11	3.42325	0.0494839	B4GALT1; beta-1,4-galactosyltransferase 1 [EC:2.4.1.22 2.4.1.90 2.4.1.38 2.4.1.-]; K07966; B4GALT2; beta-1,4-galactosyltransferase 2 [EC:2.4.1.22 2.4.1.90 2.4.1.38 2.4.1.-]; K07967	PREDICTED: beta-1,4-N-acetylgalactosaminyltransferase bre-4-like [Plutella xylostella]
LOC105387387	1.84	0.82	1.15	0.35	0	0.08	2.59384	0.0465712	katE, CAT, catB, srpA; catalase [EC:1.11.1.6]; K03781	PREDICTED: catalase-2-like [Plutella xylostella]
LOC105390579	1.45	2.56	1.67	0	0	0	7.8331	7.3119e-06	SLC6A5_9, GLYT; solute carrier family 6 (neurotransmitter transporter, glycine) member 5/9; K05038	PREDICTED: sodium- and chloride-dependent neutral and basic amino acid transporter B(0+)-like [Plutella xylostella]
LOC105380506	3.6	8.85	2.06	0.28	1.1	0.46	2.56977	0.00272951	IGF2BP1; insulin-like growth factor 2 mRNA-binding protein 1; K17391	PREDICTED: sodium-coupled monocarboxylate transporter 1-like [Plutella xylostella]
LOC105384492	31.42	34.85	2.27	1.17	6.54	3.46	2.11229	0.0240228	NA	PREDICTED: sodium-independent sulfate anion transporter-like, partial [Plutella xylostella]
LOC105383557	0.31	0.45	1.03	0.12	0.07	0.02	2.5129	0.0481313	NA	PREDICTED: sodium/hydrogen exchanger 10-like isoform X3 [Plutella xylostella]
LOC105393541	5.32	0.28	0.86	0.03	0.06	0	5.68225	0.00030346	ATPeF1B, ATP5B, ATP2; F-type H+-transporting ATPase subunit beta [EC:7.1.2.2]; K02133	PREDICTED: ATP synthase subunit beta, mitochondrial-like [Plutella xylostella]
LOC105386120	3.01	3.51	1.89	0	0	0	6.67477	0.00108515	ATPeFG, ATP5L, ATP20; F-type H+-transporting ATPase subunit g; K02140	PREDICTED: ATP synthase subunit g, mitochondrial-like [Plutella xylostella]
LOC105381634	0.42	0.73	0.35	0	0.07	0	3.85341	0.00489144	ATPeV0A, ATP6N; V-type H+-transporting ATPase subunit a; K02154	PREDICTED: V-type proton ATPase 116 kDa subunit a isoform 1-like [Plutella xylostella]
LOC105382346	1.81	4.79	1.51	0.2	0.29	0	3.52551	0.00532059	ATPeF0D, ATP5H, ATP7; F-type H+-transporting ATPase subunit d; K02138	PREDICTED: ATP synthase subunit d, mitochondrial-like [Plutella xylostella]
LOC105382071	0.77	1.27	0.97	0	0	0	6.07673	0.00835257	ATP1B, CD298; sodium/potassium-transporting ATPase subunit beta; K01540	PREDICTED: sodium/potassium-transporting ATPase subunit beta-1-like [Plutella xylostella]
LOC105395131	0.4	0.62	0	0	0	0	6.29052	0.00911605	ATP1A; sodium/potassium-transporting ATPase subunit alpha [EC:7.2.2.13]; K01539	PREDICTED: sodium/potassium-transporting ATPase subunit alpha-2-like [Plutella xylostella]
LOC105381287	4	5.82	0.63	0	0.97	0.13	2.90384	0.0156091	ATP1B, CD298; sodium/potassium-transporting ATPase subunit beta; K01540	PREDICTED: sodium/potassium-transporting ATPase subunit beta-2-like [Plutella xylostella]
LOC105388060	1.39	2.54	0	0	0.22	0.08	3.28873	0.0257678	NA	PREDICTED: katanin p60 ATPase-containing subunit A-like 1 [Plutella xylostella]
LOC105388982	14.44	27.12	7.24	0.09	2.5	0.09	3.8775	0.000661724	NA	PREDICTED: snake venom serine proteinase 4a-like [Plutella xylostella]
LOC105389050	1.04	1.83	0.37	0.02	0.38	0	2.67834	0.0354929	NA	PREDICTED: serine proteinase stubble [Plutella xylostella]
LOC105395731	3.44	4.14	0.69	0.14	0.76	0.19	2.58119	0.0109083	NA	PREDICTED: probable Xaa-Pro aminopeptidase P [Plutella xylostella]
LOC105392724	3.32	3.13	0.92	0.09	0.89	0	2.61646	0.0342204	NA	PREDICTED: xaa-Pro aminopeptidase 1-like [Plutella xylostella]
LOC105394553	2.85	4.52	0	0	0.15	0	5.06799	0.000785573	DPP4, CD26; dipeptidyl-peptidase 4 [EC:3.4.14.5]; K01278	PREDICTED: aminopeptidase , spermine oxidase-like [Plutella xylostella]
LOC105393652	2.55	2.61	1.15	0.23	0.91	0.34	1.72786	0.0279909	ABCA3; ATP-binding cassette, subfamily A (ABC1), member 3; K05643	PREDICTED: ATP-binding cassette sub-family A member 2-like [Plutella xylostella]
			Down-regulated
Gene	FOH-DBM_1	FOH-DBM_2	FOH-DBM_3	SS-DBM_1	SS-DBM_2	SS-DBM_3	logFC	FDR	KEGG	NR
LOC105388622	0.13	0.3	0	9.63	6.96	6.12	-5.74928	3.27604e-09	NA	PREDICTED: cytochrome P450 6B5-like, partial [Plutella xylostella]
LOC105386484	8.94	13.32	5.6	158	74.7	108.57	-4.1194	9.80299e-09	TBXAS1, CYP5A; thromboxane-A synthase [EC:5.3.99.5]; K01832	PREDICTED: cytochrome P450 6B6-like [Plutella xylostella]
LOC105398295	6.51	2.18	4.23	97.25	81.04	40.33	-4.47201	3.02367e-08	TBXAS1, CYP5A; thromboxane-A synthase [EC:5.3.99.5]; K01832	PREDICTED: cytochrome P450 6B5-like [Plutella xylostella]
LOC105394699	2.36	2.45	4.36	64.83	28.72	88.42	-4.86453	8.23149e-08	TBXAS1, CYP5A; thromboxane-A synthase [EC:5.3.99.5]; K01832	PREDICTED: cytochrome P450 6B5-like [Plutella xylostella]
LOC105395328	2.09	4.22	1.26	42.93	15.77	28.35	-4.02681	9.26319e-08	TBXAS1, CYP5A; thromboxane-A synthase [EC:5.3.99.5]; K01832	PREDICTED: cytochrome P450 6B6-like [Plutella xylostella]
LOC105392345	13.54	1.92	5.45	82.74	80.7	40.43	-3.63728	2.89231e-05	TBXAS1, CYP5A; thromboxane-A synthase [EC:5.3.99.5]; K01832	PREDICTED: cytochrome P450 6B5-like [Plutella xylostella]
LOC105386467	1.13	1.44	0	9.04	2.99	10.23	-3.48017	8.95738e-05	TBXAS1, CYP5A; thromboxane-A synthase [EC:5.3.99.5]; K01832	PREDICTED: cytochrome P450 6B6-like [Plutella xylostella]
LOC105386477	11.33	9.14	6.57	60.47	24.8	52.09	-2.83397	9.68391e-05	TBXAS1, CYP5A; thromboxane-A synthase [EC:5.3.99.5]; K01832	PREDICTED: cytochrome P450 6k1-like [Plutella xylostella]
LOC105382823	32.58	22.34	41.03	202.57	139.41	132.45	-2.59519	0.000645938	NA	PREDICTED: cytochrome P450 6B7-like [Plutella xylostella]
LOC105382422	2.18	4.82	6.94	26.04	15.66	23.41	-2.66316	0.00151842	PHM, CYP306A1; ecdysteroid 25-hydroxylase; K10720	PREDICTED: cytochrome P450 306a1 [Plutella xylostella]
LOC105389269	11.26	11.77	15.01	189.01	94.25	160.13	-3.93709	3.23906e-07	glutathione S-transferase [EC:2.5.1.18];GST, gst; K00799	PREDICTED: uncharacterized protein LOC105389269 [Plutella xylostella]
LOC105394254	4.74	9.23	1.76	26.49	18.78	27.31	-2.67121	5.86531e-05	glutathione S-transferase [EC:2.5.1.18];GST, gst; K00799	PREDICTED: glutathione S-transferase theta-2-like [Plutella xylostella]
LOC105391501	1.01	1.52	1.26	6.9	10.03	4.92	-3.02202	0.0013344	glutathione S-transferase [EC:2.5.1.18];GST, gst; K00799; SE; pyrimidodiazepine synthase [EC:1.5.4.1]; K00310	PREDICTED: pyrimidodiazepine synthase-like [Plutella xylostella]
LOC105392478	21.18	27.03	67.52	257.79	160.56	237.55	-2.74486	0.00198409	glutathione S-transferase [EC:2.5.1.18];GST, gst; K00799	PREDICTED: glutathione S-transferase 1-like [Plutella xylostella]
LOC105391968	1.36	0.87	3.4	39.99	35.65	49.63	-5.40095	7.91395e-09	ACHE; acetylcholinesterase [EC:3.1.1.7]; K01049	PREDICTED: cholinesterase-like, partial [Plutella xylostella]
LOC105391967	2.08	4.07	10.41	100.21	164.91	197.96	-5.39799	2.82716e-08	ACHE; acetylcholinesterase [EC:3.1.1.7]; K01049	PREDICTED: bile salt-activated lipase-like, partial [Plutella xylostella]
LOC105389660	0.73	0.53	3.04	33.59	32.59	43.43	-5.52664	6.70356e-08	ACHE; acetylcholinesterase [EC:3.1.1.7]; K01049	PREDICTED: esterase FE4-like [Plutella xylostella]
LOC105389647	8.32	3.67	26.13	239.88	156.31	265.45	-4.30415	3.74723e-05	ACHE; acetylcholinesterase [EC:3.1.1.7]; K01049	PREDICTED: LOW QUALITY PROTEIN: esterase FE4-like [Plutella xylostella]
LOC105390205	0.57	0.77	0.32	3.35	3.79	2.83	-2.97628	6.34941e-05	NA	PREDICTED: acetylcholinesterase-like isoform X4 [Plutella xylostella]
LOC105398502	8.13	2.56	22.18	186.85	93.23	147.66	-3.89723	0.000230026	ACHE; acetylcholinesterase [EC:3.1.1.7]; K01049	PREDICTED: acetylcholinesterase-like [Plutella xylostella]
LOC105392411	0.88	0.56	0.37	3.41	4.24	1.96	-2.78717	0.000678671	NA	PREDICTED: acetylcholinesterase-like [Plutella xylostella]
LOC105393145	1.84	1.08	11.09	42.38	14.9	49.2	-3.20516	0.00800339	ACHE; acetylcholinesterase [EC:3.1.1.7]; K01049	PREDICTED: acetylcholinesterase-like [Plutella xylostella]
LOC105382107	0.49	1.41	0	2	1.66	2.87	-2.09242	0.0156223	ACHE; acetylcholinesterase [EC:3.1.1.7]; K01049	PREDICTED: acetylcholinesterase; esterase FE4-like isoform X2 [Plutella xylostella]
LOC105381931	6.11	5.32	7.11	12.67	14.53	13.25	-1.54448	0.0337745	NA	PREDICTED: acetylcholinesterase-like [Plutella xylostella]
LOC105382842	10.1	3.38	36.76	157.76	27.62	188.37	-3.07127	0.0131769	carboxylesterase 1C-like	PREDICTED: carboxylesterase 1C-like [Plutella xylostella]
LOC105384612	600.48	522.01	331.82	859.79	1076.74	908.13	-1.38961	0.0405494	ATPeF1G, ATP5C1, ATP3; F-type H+-transporting ATPase subunit gamma; K02136	PREDICTED: ATP synthase subunit gamma, mitochondrial [Plutella xylostella]
LOC105382661	0.85	1.28	0	68.65	18.08	50.64	-6.26817	2.50954e-11	PRSS1_2_3; trypsin [EC:3.4.21.4]; K01312	PREDICTED: trypsin, alkaline C-like [Plutella xylostella]
LOC105380872	0.22	0.36	1.1	37.83	25.44	20.33	-6.76168	9.48041e-11	PRSS1_2_3; trypsin [EC:3.4.21.4]; K01312	PREDICTED: trypsin, alkaline C-like [Plutella xylostella]
LOC105386722	15.94	2.47	15.07	559.19	626.51	603.96	-6.10504	4.98262e-10	PRSS1_2_3; trypsin [EC:3.4.21.4]; K01312	PREDICTED: trypsin, alkaline B-like, partial [Plutella xylostella]
LOC105391879	6.6	1.33	13.23	420.15	375.49	491.72	-6.28597	6.6734e-09	PRSS1_2_3; trypsin [EC:3.4.21.4]; K01312	PREDICTED: trypsin, alkaline B-like [Plutella xylostella]
LOC105380870	0.25	0.54	2.46	24.91	28.13	40.25	-6.18272	1.71743e-08	PRSS1_2_3; trypsin [EC:3.4.21.4]; K01312	PREDICTED: trypsin, alkaline A-like [Plutella xylostella]
LOC105383763	3.49	2.01	7.36	127.91	87.08	102.45	-5.15037	1.75223e-08	PRSS1_2_3; trypsin [EC:3.4.21.4]; K01312	PREDICTED: trypsin CFT-1-like [Plutella xylostella]
LOC105386078	5.06	0.88	10.38	219.2	312.77	231.44	-5.94351	2.18134e-08	PRSS1_2_3; trypsin [EC:3.4.21.4]; K01312	PREDICTED: trypsin, alkaline B-like [Plutella xylostella]
LOC105386250	3.88	1.99	6.27	85	66.2	95.49	-4.80232	4.0144e-08	PRSS1_2_3; trypsin [EC:3.4.21.4]; K01312	PREDICTED: trypsin, alkaline C-like isoform X2 [Plutella xylostella]
LOC105380869	0.75	3	8.73	125.28	88.02	129.73	-5.41474	4.01951e-07	PRSS1_2_3; trypsin [EC:3.4.21.4]; K01312	PREDICTED: trypsin CFT-1-like [Plutella xylostella]
LOC105385640	0.22	0.83	2.18	21.78	19.52	14.86	-5.17907	5.55978e-07	PRSS1_2_3; trypsin [EC:3.4.21.4]; K01312	PREDICTED: trypsin, alkaline C-like [Plutella xylostella]
LOC105387744	4.07	5.85	4.79	120.89	79.28	90.91	-4.75589	9.46432e-11	NA	PREDICTED: facilitated trehalose transporter Tret1 [Plutella xylostella]
LOC105390846	0.21	1.63	0	19.93	34.82	13.1	-5.35631	2.65588e-10	NA	PREDICTED: facilitated trehalose transporter Tret1-like [Plutella xylostella]
LOC105395367	1.69	1.85	0	23.65	50.32	12.34	-4.73887	3.75974e-09	NA	PREDICTED: facilitated trehalose transporter Tret1-like [Plutella xylostella]
LOC105398135	0.7	2.01	0.44	35.72	10.11	22.5	-4.90044	4.66159e-09	NA	PREDICTED: facilitated trehalose transporter Tret1-like [Plutella xylostella]
LOC105390847	4.16	4.2	1.9	34.29	39.12	28.95	-3.73759	6.49029e-09	NA	PREDICTED: facilitated trehalose transporter Tret1-like [Plutella xylostella]
LOC105395363	0.77	1.33	1.1	19.35	30.01	8.31	-4.63221	6.72093e-09	NA	PREDICTED: facilitated trehalose transporter Tret1-like [Plutella xylostella]
LOC105389237	1.29	2.06	1.18	21.17	19.24	12.6	-3.99689	7.48409e-09	NA	PREDICTED: facilitated trehalose transporter Tret1-2 homolog, partial [Plutella xylostella]
LOC105394057	18.41	13.12	16.77	182.86	302.57	135.03	-3.9887	2.51394e-08	NA	PREDICTED: facilitated trehalose transporter Tret1-like [Plutella xylostella]
LOC105384164	1.28	2.04	0	11.35	10.59	12.12	-3.66699	4.69839e-07	NA	PREDICTED: facilitated trehalose transporter Tret1-like isoform X2 [Plutella xylostella]
LOC105380778	6.52	11.86	11.11	82.16	118.59	71.11	-3.57229	5.17936e-07	NA	PREDICTED: facilitated trehalose transporter Tret1-like [Plutella xylostella]
LOC105395547	4.9	5.79	3.85	39.89	33.1	23.01	-3.15801	1.50111e-06	NA	PREDICTED: facilitated trehalose transporter Tret1-like [Plutella xylostella]
LOC105395208	0.37	0.2	0	6.49	4.51	1.55	-4.63978	1.53105e-06	NA	PREDICTED: facilitated trehalose transporter Tret1-like [Plutella xylostella]
LOC105385586	27.2	22.53	30.65	272.67	319.45	140.84	-3.47268	1.71546e-06	NA	PREDICTED: facilitated trehalose transporter Tret1-like [Plutella xylostella]
LOC105397106	1.57	11.27	2.36	101.99	69.37	21.86	-4.12724	5.41236e-06	NA	PREDICTED: facilitated trehalose transporter Tret1-like [Plutella xylostella]
LOC105398298	1.62	1.07	1.73	15.85	21.44	5.76	-3.77241	6.2589e-06	NA	PREDICTED: facilitated trehalose transporter Tret1-like [Plutella xylostella]
LOC105383363	20.36	20.48	4.57	102.98	108.21	97.89	-3.21477	8.55375e-07	NDUFA11; NADH dehydrogenase (ubiquinone) 1 alpha subcomplex subunit 11; K03956	PREDICTED: NADH dehydrogenase (ubiquinone) 1;LOC105383363 [Plutella xylostella]
LOC105397921	11.43	22.86	2.73	31.55	51.39	29.49	-2.1124	0.00333933	NDUFV1; NADH dehydrogenase (ubiquinone) flavoprotein 1 [EC:7.1.1.2 1.6.99.3]; K03942	PREDICTED: NADH dehydrogenase [ubiquinone] flavoprotein 1, mitochondrial [Plutella xylostella]
LOC105385971	31.97	54.35	18.48	84.52	48.07	118.7	-1.80653	0.0113933	NDUFB2; NADH dehydrogenase (ubiquinone) 1 beta subcomplex subunit 2; K03958	PREDICTED: NADH dehydrogenase [ubiquinone] 1 beta subcomplex subunit 2, mitochondrial-like [Plutella xylostella]
LOC105391108	9.46	20.38	3.16	18.93	29.78	24.7	-1.64923	0.0144093	NDUFS2; NADH dehydrogenase (ubiquinone) Fe-S protein 2 [EC:7.1.1.2 1.6.99.3]; K03935	PREDICTED: NADH dehydrogenase;NADH-ubiquinone oxidoreductase 49 kDa subunit-like [Plutella xylostella]
LOC105392236	4.76	3.16	0	9.64	13.56	2.86	-2.0293	0.0221683	NDUFAF2; NADH dehydrogenase [ubiquinone] 1 alpha subcomplex assembly factor 2; K18160; PLD3_4; phospholipase D3/4 [EC:3.1.4.4]; K16860	PREDICTED: NADH dehydrogenase [ubiquinone] 1;phospholipase D3-like [Plutella xylostella]
LOC105384505	2.5	4.49	0.7	8.21	6.6	3.14	-1.59554	0.0368107	NDUFAF2; NADH dehydrogenase [ubiquinone] 1 alpha subcomplex assembly factor 2; K18160; PLD3_4; phospholipase D3/4 [EC:3.1.4.4]; K16860	PREDICTED: NADH dehydrogenase [ubiquinone] 1 alpha ; phospholipase D3, partial [Plutella xylostella]
LOC105390996	3.56	4.38	2.06	38.96	18.69	27.87	-3.58756	2.76989e-07	ANPEP, CD13; aminopeptidase N [EC:3.4.11.2]; K11140	PREDICTED: aminopeptidase N-like [Plutella xylostella]
LOC105386580	12.98	8.81	46.44	274.49	264.36	397.6	-3.90561	9.75727e-05	ANPEP, CD13; aminopeptidase N [EC:3.4.11.2]; K11140	PREDICTED: aminopeptidase N [Plutella xylostella]
LOC105386579	4.58	2.94	16.18	106.67	80.4	110.24	-3.80344	0.000139097	ANPEP, CD13; aminopeptidase N [EC:3.4.11.2]; K11140	PREDICTED: aminopeptidase N-like [Plutella xylostella]
LOC105390997	24.93	16.15	132.5	1202.79	569.19	1136.49	-4.16811	0.000241586	ANPEP, CD13; aminopeptidase N [EC:3.4.11.2]; K11140	PREDICTED: aminopeptidase N [Plutella xylostella]
LOC105389793	6.09	5.36	6.19	25.03	34.48	10.98	-2.33452	0.00119212	NA	PREDICTED: aminopeptidase NPEPL1 [Plutella xylostella]
LOC105386349	15.16	10.33	52.23	225.06	112.26	310.33	-3.22909	0.00182412	aminopeptidase N [EC:3.4.11.2];ANPEP, CD13; K11140	PREDICTED: membrane alanyl aminopeptidase-like [Plutella xylostella]
LOC105393000	24.78	10.66	87.22	354.73	180.65	381.92	-3.01249	0.00521716	aminopeptidase N [EC:3.4.11.2];; ANPEP, CD13; K11140	PREDICTED: membrane alanyl aminopeptidase-like [Plutella xylostella]
LOC105386254	92.87	35.25	407.63	1420.92	691.81	1491.14	-2.82264	0.0137764	aminopeptidase N [EC:3.4.11.2];ANPEP, CD13; K11140	PREDICTED: membrane alanyl aminopeptidase-like [Plutella xylostella]
LOC105390989	5.91	3.59	31.52	87.52	31.84	121.09	-2.68263	0.0228155	aminopeptidase N [EC:3.4.11.2];ANPEP, CD13; K11140	PREDICTED: membrane alanyl aminopeptidase-like [Plutella xylostella]
LOC105386096	6.24	4.14	1.41	5.02	19.29	4.4	-1.62114	0.0352687	aminopeptidase N [EC:3.4.11.2];ANPEP, CD13; K11140	PREDICTED: aminopeptidase N [Plutella xylostella]
LOC105383493	0.12	0	0	19.05	19.69	10.38	-8.95431	7.11156e-15	E3.2.1.14; chitinase [EC:3.2.1.14]; K01183	PREDICTED: chitotriosidase-1-like [Plutella xylostella]
LOC105381408	0.49	0	0	13.16	11.65	13.55	-6.7239	1.08986e-10	E3.2.1.14; chitinase [EC:3.2.1.14]; K01183	PREDICTED: chitotriosidase-1-like [Plutella xylostella]
LOC105383248	6.56	4.31	2.02	8.58	9.88	7.97	-1.45075	0.0271598	GALNT; polypeptide N-acetylgalactosaminyltransferase [EC:2.4.1.41]; K00710	PREDICTED: N-acetylgalactosaminyltransferase 7 [Plutella xylostella]
LOC105381604	0.29	0.32	0	0.41	1.28	0.49	-1.96916	0.0477515	GALNT; polypeptide N-acetylgalactosaminyltransferase [EC:2.4.1.41]; K00710	PREDICTED: N-acetylgalactosaminyltransferase 35A [Plutella xylostella]
LOC105390515	57.12	46.27	107.62	637.22	422.93	793.53	-3.39669	6.06064e-05	katE, CAT, catB, srpA; catalase [EC:1.11.1.6]; K03781	PREDICTED: catalase-like [Plutella xylostella]
LOC105398438	57.29	27.44	130.11	626.99	265.92	1360.83	-3.62696	0.000699444	katE, CAT, catB, srpA; catalase [EC:1.11.1.6]; K03781	PREDICTED: catalase-like [Plutella xylostella]
LOC105388915	0.28	0	0	1.91	0.37	2.33	-4.34402	0.0211743	katE, CAT, catB, srpA; catalase [EC:1.11.1.6]; K03781	PREDICTED: catalase-like [Plutella xylostella]
LOC105389954	10.78	13.22	4.79	61.91	62.55	69.92	-3.26264	9.74866e-07	ABCC4; ATP-binding cassette, subfamily C (CFTR/MRP), member 4; K05673	PREDICTED: multidrug resistance-associated protein 4-like isoform X3 [Plutella xylostella]
LOC105386683	0.24	0.43	0	2.05	5.79	1.3	-3.8168	4.83231e-05	ABCC10; ATP-binding cassette, subfamily C (CFTR/MRP), member 10; K05674	PREDICTED: multidrug resistance-associated protein 7-like [Plutella xylostella]
LOC105388339	4.27	4.8	1.73	17.09	14.6	14.85	-2.58157	5.38635e-05	ABCC4; ATP-binding cassette, subfamily C (CFTR/MRP), member 4; K05673	PREDICTED: multidrug resistance-associated protein 4-like [Plutella xylostella]
LOC105387094	4.47	2.72	6.85	48.64	23.16	32.46	-3.34082	7.51254e-05	ABCC10; ATP-binding cassette, subfamily C (CFTR/MRP), member 10; K05674	PREDICTED: bile pigment transporter 1-like [Plutella xylostella]
LOC105387880	1.48	2.17	1.06	5.12	12.43	4.44	-2.58202	0.00020764	ABCC4; ATP-binding cassette, subfamily C (CFTR/MRP), member 4; K05673	PREDICTED: multidrug resistance-associated protein 4-like [Plutella xylostella]
LOC105388338	19.22	26.81	14.91	81.94	66.58	103.52	-2.52163	0.00022091	ABCC4; ATP-binding cassette, subfamily C (CFTR/MRP), member 4; K05673	PREDICTED: multidrug resistance-associated protein 4-like [Plutella xylostella]
LOC105387104	1.74	1.7	0.62	6.17	6.75	6.47	-2.63928	0.000254497	ABCC10; ATP-binding cassette, subfamily C (CFTR/MRP), member 10; K05674	PREDICTED: multidrug resistance-associated protein 7-like [Plutella xylostella]
LOC105397360	4.54	4.04	0.51	9.64	25.89	7	-2.53879	0.000491626	ABCC4; ATP-binding cassette, subfamily C (CFTR/MRP), member 4; K05673	PREDICTED: probable multidrug resistance-associated protein lethal(2)03659, partial [Plutella xylostella]
LOC105396037	1.5	0.55	0	5.74	9.13	3.25	-3.32228	0.000538308	ABCC10; ATP-binding cassette, subfamily C (CFTR/MRP), member 10; K05674	PREDICTED: ABC transporter C family member 11-like, partial [Plutella xylostella]
LOC105397397	4.21	3.8	1.24	7.06	21.36	7.85	-2.30587	0.000646914	ABCC4; ATP-binding cassette, subfamily C (CFTR/MRP), member 4; K05673	PREDICTED: probable multidrug resistance-associated protein lethal(2)03659, partial [Plutella xylostella]
LOC105396282	18.66	37.91	38.77	163.77	38.98	163.74	-2.40726	0.00747492	(GABA receptor modulator, acyl-CoA-binding protein);DBI, ACBP; diazepam-binding inhibitor; K08762	PREDICTED: acyl-CoA-binding protein homolog [Plutella xylostella]
LOC105397186	321.14	153.31	493.85	1674.44	684.76	1756.95	-2.35565	0.0100444	(GABA receptor modulator, acyl-CoA-binding protein);DBI, ACBP; diazepam-binding inhibitor; K08762	PREDICTED: putative acyl-CoA-binding protein [Plutella xylostella]
LOC105396281	50.89	50.48	461.62	1189.11	780.75	2405.04	-3.03257	0.0134812	(GABA receptor modulator, acyl-CoA-binding protein);DBI, ACBP; diazepam-binding inhibitor; K08762	PREDICTED: putative acyl-CoA-binding protein [Plutella xylostella]
LOC105383119	139.42	114.81	313.49	848.05	314.36	805.18	-2.04539	0.027683	(GABA receptor modulator, acyl-CoA-binding protein);DBI, ACBP; diazepam-binding inhibitor; K08762	PREDICTED: putative acyl-CoA-binding protein [Plutella xylostella]
LOC105388506	0.21	0.11	1.05	38.3	7.87	70.78	-7.70712	3.94496e-08	UGT; glucuronosyltransferase [EC:2.4.1.17]; K00699	PREDICTED: UDP-glucuronosyltransferase 2B18-like [Plutella xylostella]
LOC105380066	3.86	1.77	5.62	44.35	31.83	37.35	-3.80694	6.36738e-06	UGT; glucuronosyltransferase [EC:2.4.1.17]; K00699	PREDICTED: UDP-glucuronosyltransferase 2B1-like [Plutella xylostella]
LOC105393542	2.85	0.89	6.12	90.13	54.12	100.54	-5.11655	5.4805e-07	SLC17A5; MFS transporter, ACS family, solute carrier family 17 (sodium-dependent inorganic phosphate cotransporter), member 5; K12301	PREDICTED: putative inorganic phosphate cotransporter [Plutella xylostella]
LOC105392875	18.53	18.49	10.36	113.54	137.85	67.72	-3.15325	1.25671e-06	NA	PREDICTED: sodium-independent sulfate anion transporter-like isoform X2 [Plutella xylostella]
LOC105384135	0.1	0.33	0.5	7.27	3.3	7.74	-5.17258	3.58714e-06	NA	PREDICTED: sodium-dependent nutrient amino acid transporter 1-like [Plutella xylostella]
LOC105392444	5.53	2.95	12.03	124.23	54.14	118.99	-4.13851	1.64123e-05	SLC6A5_9, GLYT; solute carrier family 6 (neurotransmitter transporter, glycine) member 5/9; K05038	PREDICTED: sodium-dependent nutrient amino acid transporter 1-like [Plutella xylostella]
LOC105398431	9.39	4.76	9.61	61.26	33.53	92.72	-3.39726	5.36051e-05	E3.1.3.1, phoA, phoB; alkaline phosphatase [EC:3.1.3.1]; K01077	PREDICTED: alkaline phosphatase-like [Plutella xylostella]

## Sheet: CL vs FOH
	Table S3 The differentially expressed genes between chlorantraniliprole-resistant (CL-DBM) and field original high resistant (FOH-DBM) of Plutelle xylostella
			CL vs FOH
			Up-regulated
Gene	CL-DBM_1	CL-DBM_2	CL-DBM_3	FOH-DBM_1	FOH-DBM_2	FOH-DBM_3	logFC	FDR	KEGG	NR
LOC105382179	7.6	1.28	1.84	0.13	0.09	0.21	4.25521	0.00206346	NA	PREDICTED: cytochrome P450 6B1-like [Plutella xylostella]
LOC105397997	4.03	3.16	1.19	0.53	0.06	0.16	3.15918	0.00617449	NA	PREDICTED: cytochrome P450 4g15 [Plutella xylostella]
LOC105389044	15.43	22.67	5.47	2.82	1.27	3.2	2.22376	0.00917364	NA	PREDICTED: cytochrome P450 4g15-like [Plutella xylostella]
LOC105398353	1.16	3.5	0	0	0	0	6.985	0.00919973	NA	PREDICTED: cytochrome P450 4C1-like [Plutella xylostella]
LOC105380105	79.18	135.96	42.71	22.85	7.38	16.37	2.11985	0.014193	NA	PREDICTED: cytochrome P450 4g15-like [Plutella xylostella]
LOC105387501	3.35	6.05	2.49	0.96	0.09	0.34	2.77986	0.0156101	SAD, CYP315A1; ecdysteroid 2-hydroxylase; K10722	PREDICTED: cytochrome P450 315a1, mitochondrial-like isoform X2 [Plutella xylostella]
LOC105398192	24.48	13.08	4.02	3.36	1.22	2.69	2.16254	0.0178798	NA	PREDICTED: cytochrome P450 301a1, mitochondrial [Plutella xylostella]
LOC105391053	85.06	97.14	56.3	17.59	12.66	19.42	1.9147	0.0208023	NA	PREDICTED: cytochrome P450 4g15 [Plutella xylostella]
LOC105381026	13.49	6.05	0	0	0.29	0.84	3.63991	0.0240505	NA	PREDICTED: cytochrome P450 4V2-like [Plutella xylostella]
LOC105386477	1.79	7.15	4.24	0.13	0.3	0	4.55785	0.00363297	TBXAS1, CYP5A; thromboxane-A synthase [EC:5.3.99.5]; K01832	PREDICTED: cytochrome P450 6k1-like [Plutella xylostella]
LOC105382422	53.68	12.9	82.87	0	0	8.36	3.7007	0.018132	PHM, CYP306A1; ecdysteroid 25-hydroxylase; K10720	PREDICTED: cytochrome P450 306a1 [Plutella xylostella]
LOC105398295	5.19	0.97	1.9	0.4	0.04	0.34	3.2904	0.0459312	TBXAS1, CYP5A; thromboxane-A synthase [EC:5.3.99.5]; K01832	PREDICTED: cytochrome P450 6B5-like [Plutella xylostella]
LOC105381333	2.94	26.21	12.91	0.71	3.3	0.55	2.64918	0.00465795	NA	PREDICTED: cytochrome P450 9f2 [Plutella xylostella]
LOC105398353	0.87	1.82	1.79	0	0.19	0.15	2.97188	0.00682723	NA	PREDICTED: cytochrome P450 4C1-like [Plutella xylostella]
LOC105391963	0.5	8.43	2.56	0.14	0.27	0.28	3.27845	0.0136978	NA	PREDICTED: cytochrome P450 9e2-like [Plutella xylostella]
LOC105382421	18.86	40.83	58.88	9.68	6.03	9.06	1.53712	0.0230728	CYP18A1; 26-hydroxylase [EC:1.14.-.-]; K14985; CYP2J; cytochrome P450 family 2 subfamily J [EC:1.14.14.1 1.14.14.73 1.14.14.74 1.14.14.75]; K07418	PREDICTED: cytochrome P450 18a1-like [Plutella xylostella]
LOC105396623	8.25	9.07	15.65	0.54	4.58	1.26	1.79145	0.026778	NA	PREDICTED: cytochrome P450 305a1 [Plutella xylostella]
LOC105389425	17.55	2.11	2.87	0.18	2.12	0.05	2.62265	0.0338013	NA	PREDICTED: cytochrome P450 4g15-like [Plutella xylostella]
LOC105388787	11.94	20.69	10.38	3.45	4.25	4.17	1.40594	0.0286891	NA	PREDICTED: cytochrome P450 4d2-like [Plutella xylostella]
LOC105381077	0.34	0.69	0.57	0	0.15	0	2.80108	0.0368227	NA	PREDICTED: cytochrome P450 4c21-like [Plutella xylostella]
LOC105386629	0	3.29	12.42	0	0	0	8.72662	0.0153795	NA	PREDICTED: probable cytochrome P450 9f2 [Plutella xylostella]
LOC105387052	0.71	2.04	0	0	0	0.05	4.73035	0.0250273	NA	PREDICTED: cytochrome P450 4C1, partial [Plutella xylostella]
LOC105381873	11.76	12.4	0.04	0.12	0	0	7.19541	0.000569271	EPHX1; glutathione peroxidase [EC:1.11.1.12]; K05361; JHEH; juvenile hormone epoxide hydrolase; K10719	PREDICTED: juvenile hormone epoxide hydrolase-like [Plutella xylostella]
LOC105395925	2.65	2.66	1.73	0.26	0.07	0	4.23118	0.0202143	glutathione peroxidase [EC:1.11.1.12]; K05361; JHEH; juvenile hormone epoxide hydrolase; K10719	PREDICTED: juvenile hormone epoxide hydrolase-like [Plutella xylostella]
LOC105381873	11.76	12.4	0.04	0.12	0	0	7.19541	0.000569271	EPHX1; glutathione peroxidase [EC:1.11.1.12]; K05361; JHEH; juvenile hormone epoxide hydrolase; K10719	PREDICTED: juvenile hormone epoxide hydrolase-like [Plutella xylostella]
LOC105393992	3.83	4.32	6.95	0.69	0.69	0	3.25092	0.00876216	glutathione S-transferase [EC:2.5.1.18];GST, gst; K00799; SE; pyrimidodiazepine synthase [EC:1.5.4.1]; K00310	PREDICTED: LOW QUALITY PROTEIN: pyrimidodiazepine synthase-like [Plutella xylostella]
LOC105383753	0.22	5.52	3.1	0	0.13	0	5.65072	0.000471945	glutathione S-transferase [EC:2.5.1.18];GST, gst; K00799	PREDICTED: glutathione S-transferase theta-2-like [Plutella xylostella]
LOC105386021	12.8	9.23	28.78	0.12	0	0.48	5.57794	7.8067e-07	glutathione S-transferase [EC:2.5.1.18]; GST, gst; K00799	PREDICTED: glutathione S-transferase 1-like [Plutella xylostella]
LOC105389539	0.57	0.96	2.2	0.06	0.3	0.03	2.87437	0.0346282	glutathione S-transferase [EC:2.5.1.18];GST, gst; K00799	PREDICTED: glutathione S-transferase 1-1-like [Plutella xylostella]
LOC105382842	7.63	1.93	6.72	0.56	0.07	0	4.45986	0.00298036	NA	PREDICTED: carboxylesterase 1C-like [Plutella xylostella]
LOC105396641	3.48	5.16	3.33	0.44	1.08	0.52	1.87409	0.00943441	NA	PREDICTED: carboxylesterase-like [Plutella xylostella]
LOC105382360	8.4	8.57	6.31	0.39	1.56	0.32	3.03979	0.000114557	carboxylesterase-6	PREDICTED: venom carboxylesterase-6 [Plutella xylostella]
LOC105398177	8.17	14.98	2.97	1.04	1.72	0.93	2.36636	0.00127524	carboxylesterase 1 [EC:3.1.1.1];CES1; K01044	PREDICTED: juvenile hormone esterase-like [Plutella xylostella]
LOC105385951	6.84	11.13	1.63	0.62	1.23	0.71	2.48072	0.00179148	carboxylesterase 1 [EC:3.1.1.1]; CES1; K01044	PREDICTED: juvenile hormone esterase-like [Plutella xylostella]
LOC105387899	8.98	38.96	1.14	1.67	5.07	1.35	2.05192	0.0439219	carboxylesterase 1 [EC:3.1.1.1];CES1; K01044	PREDICTED: juvenile hormone esterase-like [Plutella xylostella]
LOC105398184	142.05	0.89	0.79	0.05	0.21	0.38	7.63212	0.000706923	NA	PREDICTED: acetylcholine receptor subunit alpha-like, partial [Plutella xylostella]
LOC105386771	0.69	0.82	1.91	0.03	0.2	0.14	2.72782	0.0382938	NA	PREDICTED: acetylcholine receptor gar-3 [Plutella xylostella]
LOC105391613	6.04	0.22	3.73	0	0	0.23	4.68914	0.038298	NA	PREDICTED: acetylcholine receptor subunit alpha-like, partial [Plutella xylostella]
LOC105381931	0	3.29	12.42	0	0	0	8.72662	0.0153795	NA	PREDICTED: acetylcholinesterase-like [Plutella xylostella]
LOC105390205	2.17	9.06	8.08	1	0.55	0	3.39782	0.0229987	NA	PREDICTED: acetylcholinesterase-like isoform X4 [Plutella xylostella]
LOC105382107	27.96	43.31	42.3	51.8	94.33	66.55	-1.58933	0.00503888	ACHE; acetylcholinesterase [EC:3.1.1.7]; K01049	PREDICTED: acetylcholinesterase [EC:3.1.1.7]; esterase FE4-like isoform X2 [Plutella xylostella]
LOC105391967	48.89	44.68	0.16	0.35	0	0.08	7.39937	0.000205424	ACHE; acetylcholinesterase [EC:3.1.1.7]; K01049	PREDICTED: bile salt-activated lipase-like, partial [Plutella xylostella]
LOC105389660	12.96	2.52	0.05	0.05	0.05	0.05	6.43031	0.00148532	ACHE; acetylcholinesterase [EC:3.1.1.7]; K01049	PREDICTED: esterase FE4-like [Plutella xylostella]
LOC105398502	1.23	1.38	0.04	0	0	0	7.20456	0.00545641	ACHE; acetylcholinesterase [EC:3.1.1.7]; K01049	PREDICTED: acetylcholinesterase-like [Plutella xylostella]
LOC105381931	7.67	2.42	1.76	0	0.29	0.84	2.61722	0.0280565	NA	PREDICTED: acetylcholinesterase-like [Plutella xylostella]
LOC105383118	10.61	6.7	45.08	0.48	0.33	1.43	4.75397	0.00026567	PRSS1_2_3; trypsin [EC:3.4.21.4]; K01312	PREDICTED: trypsin-1-like [Plutella xylostella]
LOC105392860	4.9	7.54	0	0.12	0	0.48	3.86335	0.0126252	PRSS1_2_3; trypsin [EC:3.4.21.4]; K01312	PREDICTED: trypsin CFT-1-like [Plutella xylostella]
LOC105391571	5.68	3.34	7.12	0	0.43	1.19	2.98053	0.0285367	PRSS1_2_3; trypsin [EC:3.4.21.4]; K01312	PREDICTED: trypsin CFT-1-like [Plutella xylostella]
LOC105395206	17.42	25.62	7.18	1.25	0.94	4.14	2.65914	0.00234473	NA	PREDICTED: facilitated trehalose transporter Tret1-like [Plutella xylostella]
LOC105392450	65.19	55.85	12.27	10.14	4.42	6.68	2.22208	0.0150591	NADH dehydrogenase (ubiquinone) 1 beta subcomplex subunit 7; NDUFB7; K03963;HEY; hairy and enhancer of split related with YRPW motif; K09091	PREDICTED: hairy/enhancer-of-split related with YRPW motif protein isoform X2 [Plutella xylostella]
LOC105386486	1.48	1.11	1.17	0	0	0	7.53871	0.000320454	NA	PREDICTED: glutamate receptor ionotropic, delta-1-like [Plutella xylostella]
LOC105391323	0.39	0.47	1.17	0.08	0	0	3.99208	0.0339994	NA	PREDICTED: glutamate receptor 2-like [Plutella xylostella]
LOC105383392	80.96	78.85	25.16	10.45	6.14	15.96	2.14365	0.0121671	NA	PREDICTED: serpin B13 isoform X2 [Plutella xylostella]
LOC105390554	3.9	10.29	0	0.12	0.34	0.57	3.26963	0.028873	SERPINB; serpin B; K13963	PREDICTED: serpin B8-like [Plutella xylostella]
LOC105387001	125.65	58.93	30.46	21.81	6.37	14.84	1.99995	0.0297573	SERPINB; serpin B; K13963	PREDICTED: serpin B3-like [Plutella xylostella]
LOC105390553	5.28	7.68	0.83	0.85	0.59	0.63	2.35606	0.0460596	SERPINB; serpin B; K13963	PREDICTED: serpin plasminogen activator inhibitor 1-like [Plutella xylostella]
LOC105383909	24.42	10.1	99.56	1.42	3.67	5.98	3.56532	0.0061766	E3.2.1.14; chitinase [EC:3.2.1.14]; K01183	PREDICTED: probable chitinase 2 [Plutella xylostella]
LOC105392303	34.32	4.9	60.91	2.03	2.42	6.28	3.17179	0.00861976	E3.2.1.14; chitinase [EC:3.2.1.14]; K01183	PREDICTED: probable endochitinase [Plutella xylostella]
LOC105385326	21.9	18.81	3	3.27	1.99	3.64	1.86019	0.042137	E3.2.1.14; chitinase [EC:3.2.1.14]; K01183	PREDICTED: probable chitinase 3 [Plutella xylostella]
LOC105390728	2.35	2.57	0.73	0.52	0.18	0.64	1.76339	0.0442525	E3.2.1.14; chitinase [EC:3.2.1.14]; K01183	PREDICTED: mucin-5AC isoform X2 [Plutella xylostella]
LOC105381436	0.5	1.48	0.25	0.05	0.04	0.14	2.91369	0.0283063	ABCC4; ATP-binding cassette, subfamily C (CFTR/MRP), member 4; K05673	PREDICTED: probable multidrug resistance-associated protein lethal(2)03659 [Plutella xylostella]
LOC105380644	21.86	31.14	9.62	6.05	1.29	3.74	2.1775	0.0103824	NA	PREDICTED: connectin-like [Plutella xylostella]
LOC105383557	0.31	0.45	1.03	0	0	0.04	4.67723	0.00437651	NA	PREDICTED: sodium/hydrogen exchanger 10-like isoform X3 [Plutella xylostella]
LOC105390579	1.45	2.56	1.67	0	0	0.31	3.67401	0.00917364	SLC6A5_9, GLYT; solute carrier family 6 (neurotransmitter transporter, glycine) member 5/9; K05038	PREDICTED: sodium- and chloride-dependent neutral and basic amino acid transporter B(0+)-like [Plutella xylostella]
LOC105395206	17.42	25.62	7.18	1.25	0.94	4.14	2.65914	0.00234473	NA	PREDICTED: facilitated trehalose transporter Tret1-like [Plutella xylostella]
LOC105397567	5.02	13.52	2.1	0	0	1.3	3.50111	0.016943	NA	PREDICTED: ATPase inhibitor mai-1, mitochondrial-like [Plutella xylostella]
LOC105386432	1.17	2.65	2.09	0.34	0.24	0.34	2.29248	0.0446558	DDX20, GEMIN3; ATP-dependent RNA helicase DDX20 [EC:3.6.4.13]; K13131	PREDICTED: probable ATP-dependent RNA helicase DDX20 [Plutella xylostella]
LOC105382818	5.18	7.27	3.44	0.47	0.71	0.55	2.77131	0.00312577	NA	PREDICTED: probable ATP-dependent RNA helicase DDX10 [Plutella xylostella]
LOC105386775	3.91	3.86	0.9	0.43	0.13	0.48	2.72583	0.00716705	NA	PREDICTED: serine/arginine repetitive matrix protein 1-like [Plutella xylostella]
LOC105397192	5.24	11.22	8.09	1.87	1.01	1.18	2.26625	0.013162	NA	PREDICTED: serine/threonine-protein phosphatase 4 regulatory subunit 2-like [Plutella xylostella]
LOC105380396	69.91	89.54	91.5	30.13	6.4	10.65	2.231	0.0211748	NA	PREDICTED: serine/threonine-protein phosphatase 1 regulatory subunit 10 [Plutella xylostella]
LOC105389035	2.9	1.62	1.19	0.15	0.13	0.51	2.5363	0.0215638	NA	PREDICTED: serine/threonine-protein kinase par-1 [Plutella xylostella]
LOC105383628	0.33	0.55	0.5	0.07	0	0.07	2.89046	0.0244006	NA	PREDICTED: serine protease nudel [Plutella xylostella]
LOC105382635	17.38	53.67	1.98	0	0	4.49	3.64988	0.0260861	NA	PREDICTED: serine/arginine repetitive matrix protein 1-like isoform X1 [Plutella xylostella]
LOC105389450	12.68	2.07	10.79	0	0.04	0.29	5.55571	4.41012e-06	UGT; glucuronosyltransferase [EC:2.4.1.17]; K00699	PREDICTED: UDP-glucuronosyltransferase 2B18-like isoform X2 [Plutella xylostella]
LOC105393944	29.61	5.03	23.55	0	0.13	0.61	5.50591	4.51866e-06	UGT; glucuronosyltransferase [EC:2.4.1.17]; K00699	PREDICTED: UDP-glucuronosyltransferase 2B2-like [Plutella xylostella]
LOC105389540	3.91	1.69	4.38	0.04	0.08	0.14	4.50457	4.57786e-06	UGT; glucuronosyltransferase [EC:2.4.1.17]; K00699	PREDICTED: UDP-glucuronosyltransferase 2B15-like [Plutella xylostella]
LOC105388506	4.83	2.81	10.93	0	0	0	8.18509	7.61175e-06	UGT; glucuronosyltransferase [EC:2.4.1.17]; K00699	PREDICTED: UDP-glucuronosyltransferase 2B18-like [Plutella xylostella]
LOC105389540	17.35	6.8	11.22	0.47	0.32	0.7	3.84383	7.64694e-06	UGT; glucuronosyltransferase [EC:2.4.1.17]; K00699	PREDICTED: UDP-glucuronosyltransferase 2B15-like [Plutella xylostella]
			Down-regulated
Gene	CL-DBM_1	CL-DBM_2	CL-DBM_3	FOH-DBM_1	FOH-DBM_2	FOH-DBM_3	logFC	FDR	KEGG	NR
LOC105380553	0.13	0.21	1.27	223.45	2.35	67.59	-8.2076	1.95968e-05	TBXAS1, CYP5A; thromboxane-A synthase [EC:5.3.99.5]; K01832	PREDICTED: cytochrome P450 6B7-like [Plutella xylostella]
LOC105394699	2.36	2.45	4.36	10.77	167.83	193.61	-5.76898	2.52663e-05	TBXAS1, CYP5A; thromboxane-A synthase [EC:5.3.99.5]; K01832	PREDICTED: cytochrome P450 6B5-like [Plutella xylostella]
LOC105395328	2.09	4.22	1.26	3.33	54.7	39.51	-4.27532	0.000619799	TBXAS1, CYP5A; thromboxane-A synthase [EC:5.3.99.5]; K01832	PREDICTED: cytochrome P450 6B6-like [Plutella xylostella]
LOC105386484	8.94	13.32	5.6	9.51	246.36	143.45	-4.47194	0.000761519	TBXAS1, CYP5A; thromboxane-A synthase [EC:5.3.99.5]; K01832	PREDICTED: cytochrome P450 6B6-like [Plutella xylostella]
LOC105386467	1.13	1.44	0	0.39	20.19	46.12	-4.96181	0.0011075	TBXAS1, CYP5A; thromboxane-A synthase [EC:5.3.99.5]; K01832	PREDICTED: cytochrome P450 6B6-like [Plutella xylostella]
LOC105381077	0.34	0.69	0.57	13.6	3	2.54	-3.97411	0.0017811	NA	PREDICTED: cytochrome P450 4c21-like [Plutella xylostella]
LOC105388622	0.13	0.3	0	0.83	3.17	4.78	-4.35292	0.00194203	NA	PREDICTED: cytochrome P450 6B5-like, partial [Plutella xylostella]
LOC105382823	32.58	22.34	41.03	122.25	117.47	401.93	-2.86285	0.00348093	NA	PREDICTED: cytochrome P450 6B7-like [Plutella xylostella]
LOC105381698	0.63	0.69	5.04	331.5	1.79	14.45	-5.78281	0.0046667	NA	PREDICTED: cytochrome P450 CYP12A2-like [Plutella xylostella]
LOC105389269	11.26	11.77	15.01	65.42	167.24	133.78	-3.6721	0.000204261	GST, gst; glutathione S-transferase [EC:2.5.1.18]; K00799	PREDICTED: uncharacterized protein LOC105389269 [Plutella xylostella]
LOC105391501	1.01	1.52	1.26	9.5	7.03	8	-3.14259	0.00589859	GST, gst; glutathione S-transferase [EC:2.5.1.18]; K00799; SE; pyrimidodiazepine synthase [EC:1.5.4.1]; K00310	PREDICTED: pyrimidodiazepine synthase-like [Plutella xylostella]
LOC105394254	4.74	9.23	1.76	10.23	14.04	19.47	-1.86272	0.032362	GST, gst; glutathione S-transferase [EC:2.5.1.18]; K00799	PREDICTED: glutathione S-transferase theta-2-like [Plutella xylostella]
LOC105391968	1.36	0.87	3.4	2.57	44.07	31.07	-4.52428	0.00309941	ACHE; acetylcholinesterase [EC:3.1.1.7]; K01049	PREDICTED: cholinesterase-like, partial [Plutella xylostella]
LOC105392411	0.88	0.56	0.37	1.86	2.94	6.26	-2.91934	0.00545556	NA	PREDICTED: acetylcholinesterase-like [Plutella xylostella]
LOC105390205	0.57	0.77	0.32	1.84	2.18	4.56	-2.66291	0.00700947	NA	PREDICTED: acetylcholinesterase-like isoform X4 [Plutella xylostella]
LOC105389647	8.32	3.67	26.13	19.98	215.77	126.71	-3.5507	0.0137358	ACHE; acetylcholinesterase [EC:3.1.1.7]; K01049	PREDICTED: LOW QUALITY PROTEIN: esterase FE4-like [Plutella xylostella]
LOC105397896	25.57	4.41	30.37	48.37	307.54	549.4	-4.08903	0.00214342	CES1; carboxylesterase 1 [EC:3.1.1.1]; K01044	PREDICTED: juvenile hormone esterase-like [Plutella xylostella]
LOC105393732	70.79	32.06	18.44	96.53	70.75	175.42	-1.8331	0.0463464	CES1; carboxylesterase 1 [EC:3.1.1.1]; K01044	PREDICTED: venom carboxylesterase-6-like [Plutella xylostella]
LOC105380872	0.22	0.36	1.1	6.9	106.8	98.51	-8.01065	1.52193e-06	PRSS1_2_3; trypsin [EC:3.4.21.4]; K01312	PREDICTED: trypsin, alkaline C-like [Plutella xylostella]
LOC105388353	0	0.96	0	173.84	4.18	22.21	-7.45502	8.64343e-06	PRSS1_2_3; trypsin [EC:3.4.21.4]; K01312	PREDICTED: uncharacterized protein LOC105388353 [Plutella xylostella]
LOC105388756	1.03	1.88	1.72	41.85	8.8	54.12	-4.8207	1.65875e-05	PRSS1_2_3; trypsin [EC:3.4.21.4]; K01312	PREDICTED: G-protein coupled receptor 126-like [Plutella xylostella]
LOC105391879	6.6	1.33	13.23	24.4	199.2	425.3	-5.13447	0.000514716	PRSS1_2_3; trypsin [EC:3.4.21.4]; K01312	PREDICTED: trypsin, alkaline B-like [Plutella xylostella]
LOC105386722	15.94	2.47	15.07	43.13	194.56	294.83	-4.30544	0.000661921	PRSS1_2_3; trypsin [EC:3.4.21.4]; K01312	PREDICTED: trypsin, alkaline B-like, partial [Plutella xylostella]
LOC105386105	4.27	3.42	4.94	3.73	186.54	58.41	-4.98927	0.00125448	PRSS1_2_3; trypsin [EC:3.4.21.4]; K01312	PREDICTED: achelase-1-like [Plutella xylostella]
LOC105380870	0.25	0.54	2.46	1.64	89.81	14.78	-6.18345	0.00212429	PRSS1_2_3; trypsin [EC:3.4.21.4]; K01312	PREDICTED: trypsin, alkaline A-like [Plutella xylostella]
LOC105383763	3.49	2.01	7.36	8.24	51.41	102.55	-3.97645	0.00212517	PRSS1_2_3; trypsin [EC:3.4.21.4]; K01312	PREDICTED: trypsin CFT-1-like [Plutella xylostella]
LOC105383575	0	0	0	11.61	1.3	0.63	-8.12418	0.00383468	PRSS1_2_3; trypsin [EC:3.4.21.4]; K01312	PREDICTED: trypsin, alkaline C-like [Plutella xylostella]
LOC105380869	0.75	3	8.73	8.85	72.11	58.95	-4.01965	0.00608293	PRSS1_2_3; trypsin [EC:3.4.21.4]; K01312	PREDICTED: trypsin CFT-1-like [Plutella xylostella]
LOC105394359	7.15	5.11	33.83	10.96	957.89	31.74	-4.94586	0.0154682	PRSS1_2_3; trypsin [EC:3.4.21.4]; K01312	PREDICTED: trypsin, alkaline C-like [Plutella xylostella]
LOC105383594	6.2	3.92	22.7	9.84	263.82	56.9	-3.81546	0.0196293	PRSS1_2_3; trypsin [EC:3.4.21.4]; K01312	PREDICTED: trypsin, alkaline B-like [Plutella xylostella]
LOC105388679	6.78	2.47	16.34	2.46	177.52	110.69	-3.9011	0.0209371	PRSS1_2_3; trypsin [EC:3.4.21.4]; K01312	PREDICTED: trypsin, alkaline A-like [Plutella xylostella]
LOC105386078	5.06	0.88	10.38	8.07	33.35	94.4	-3.26876	0.0221914	PRSS1_2_3; trypsin [EC:3.4.21.4]; K01312	PREDICTED: trypsin, alkaline B-like [Plutella xylostella]
LOC105387744	4.07	5.85	4.79	80.87	167.09	225.92	-5.39468	3.78044e-08	NA	PREDICTED: facilitated trehalose transporter Tret1 [Plutella xylostella]
LOC105385524	0	0.51	0	250.67	9.03	25.02	-8.78533	4.41286e-07	NA	PREDICTED: facilitated trehalose transporter Tret1-like [Plutella xylostella]
LOC105390846	0.21	1.63	0	10.44	38.21	51.86	-6.03348	6.05619e-07	NA	PREDICTED: facilitated trehalose transporter Tret1-like [Plutella xylostella]
LOC105385586	27.2	22.53	30.65	353.99	424.87	756.76	-4.51079	1.0693e-06	NA	PREDICTED: facilitated trehalose transporter Tret1-like [Plutella xylostella]
LOC105395209	0.1	0.16	0	103.82	1.63	12.08	-8.60819	1.10205e-06	NA	PREDICTED: facilitated trehalose transporter Tret1-like [Plutella xylostella]
LOC105390847	4.16	4.2	1.9	26.25	26.2	61.96	-3.79016	7.69272e-06	NA	PREDICTED: facilitated trehalose transporter Tret1-like [Plutella xylostella]
LOC105389237	1.29	2.06	1.18	6.98	28.07	39.24	-4.46371	1.34284e-05	NA	PREDICTED: facilitated trehalose transporter Tret1-2 homolog, partial [Plutella xylostella]
LOC105381246	0	0	0	48.27	1.8	2.35	-10.8686	1.65875e-05	NA	PREDICTED: facilitated trehalose transporter Tret1-like [Plutella xylostella]
LOC105384505	2.5	4.49	0.7	19.5	4.57	21.4	-2.74636	0.00200519	NDUFAF2; NADH dehydrogenase [ubiquinone] 1 alpha subcomplex assembly factor 2; K18160; PLD3_4; phospholipase D3/4 [EC:3.1.4.4]; K16860	PREDICTED: phospholipase D3, partial [Plutella xylostella]
LOC105392236	4.76	3.16	0	23.8	4.53	23.49	-2.88238	0.00550642	NDUFAF2; NADH dehydrogenase [ubiquinone] 1 alpha subcomplex assembly factor 2; K18160; PLD3_4; phospholipase D3/4 [EC:3.1.4.4]; K16860	PREDICTED: phospholipase D3-like [Plutella xylostella]
LOC105383363	20.36	20.48	4.57	61.6	34.28	50.24	-2.03884	0.0109382	NDUFA11; NADH dehydrogenase (ubiquinone) 1 alpha subcomplex subunit 11; K03956	PREDICTED: uncharacterized protein LOC105383363 [Plutella xylostella]
LOC105397921	11.43	22.86	2.73	38.54	29.78	43.19	-2.05993	0.0246162	NDUFV1; NADH dehydrogenase (ubiquinone) flavoprotein 1 [EC:7.1.1.2 1.6.99.3]; K03942	PREDICTED: NADH dehydrogenase [ubiquinone] flavoprotein 1, mitochondrial [Plutella xylostella]
LOC105386580	12.98	8.81	46.44	31.68	500.5	130.04	-3.66329	0.0158457	ANPEP, CD13; aminopeptidase N [EC:3.4.11.2]; K11140	PREDICTED: aminopeptidase N [Plutella xylostella]
LOC105392901	14.56	5.66	51.78	13.33	747.18	176.17	-4.14445	0.0195543	ANPEP, CD13; aminopeptidase N [EC:3.4.11.2]; K11140	PREDICTED: aminopeptidase N-like [Plutella xylostella]
LOC105390996	3.56	4.38	2.06	10.58	9.47	6.15	-1.8359	0.0304504	ANPEP, CD13; aminopeptidase N [EC:3.4.11.2]; K11140	PREDICTED: aminopeptidase N-like [Plutella xylostella]
LOC105386579	4.58	2.94	16.18	4.19	79.41	99.77	-3.11228	0.0360692	ANPEP, CD13; aminopeptidase N [EC:3.4.11.2]; K11140	PREDICTED: aminopeptidase N-like [Plutella xylostella]
LOC105386585	10.13	17.54	3.43	112.46	4.85	28.43	-2.53343	0.036905	ANPEP, CD13; aminopeptidase N [EC:3.4.11.2]; K11140	PREDICTED: aminopeptidase N-like isoform X2 [Plutella xylostella]
LOC105397824	9.95	8.89	0	23.76	7.85	45.26	-2.15769	0.0389829	NA	PREDICTED: aminopeptidase NPEPL1, partial [Plutella xylostella]
LOC105390988	13.85	5.58	38.46	6.93	346.37	93.5	-3.352	0.0444038	ANPEP, CD13; aminopeptidase N [EC:3.4.11.2]; K11140	PREDICTED: aminopeptidase N-like [Plutella xylostella]
LOC105386096	6.24	4.14	1.41	29	3.42	7.89	-2.0555	0.0456894	ANPEP, CD13; aminopeptidase N [EC:3.4.11.2]; K11140	PREDICTED: aminopeptidase N [Plutella xylostella]
LOC105383493	0.12	0	0	1.83	19.82	38.6	-9.08575	6.05619e-07	E3.2.1.14; chitinase [EC:3.2.1.14]; K01183	PREDICTED: chitotriosidase-1-like [Plutella xylostella]
LOC105381408	0.49	0	0	2.92	9.47	31.7	-6.6305	8.05326e-06	E3.2.1.14; chitinase [EC:3.2.1.14]; K01183	PREDICTED: chitotriosidase-1-like [Plutella xylostella]
LOC105386993	5.22	2.36	2.73	37.4	72.97	33.92	-4.3166	1.74401e-05	ABCC4; ATP-binding cassette, subfamily C (CFTR/MRP), member 4; K05673	PREDICTED: probable multidrug resistance-associated protein lethal(2)03659 [Plutella xylostella]
LOC105386683	0.24	0.43	0	1.87	4.85	8.59	-4.60838	3.25219e-05	ABCC10; ATP-binding cassette, subfamily C (CFTR/MRP), member 10; K05674	PREDICTED: multidrug resistance-associated protein 7-like [Plutella xylostella]
LOC105387880	1.48	2.17	1.06	8.66	6.8	22.14	-3.26725	0.000108946	ABCC4; ATP-binding cassette, subfamily C (CFTR/MRP), member 4; K05673	PREDICTED: multidrug resistance-associated protein 4-like [Plutella xylostella]
LOC105397397	4.21	3.8	1.24	18.24	8.79	32.44	-2.92878	0.000346	ABCC4; ATP-binding cassette, subfamily C (CFTR/MRP), member 4; K05673	PREDICTED: probable multidrug resistance-associated protein lethal(2)03659, partial [Plutella xylostella]
LOC105397360	4.54	4.04	0.51	24.04	8.5	27.35	-2.96058	0.000497808	ABCC4; ATP-binding cassette, subfamily C (CFTR/MRP), member 4; K05673	PREDICTED: probable multidrug resistance-associated protein lethal(2)03659, partial [Plutella xylostella]
LOC105389954	10.78	13.22	4.79	32.01	73.34	68.31	-3.11701	0.000788167	ABCC4; ATP-binding cassette, subfamily C (CFTR/MRP), member 4; K05673	PREDICTED: multidrug resistance-associated protein 4-like isoform X3 [Plutella xylostella]
LOC105383758	12.42	10.4	1.13	49.97	32.25	35.31	-2.66685	0.00173496	ABCC4; ATP-binding cassette, subfamily C (CFTR/MRP), member 4; K05673	PREDICTED: uncharacterized protein LOC105383758 [Plutella xylostella]
LOC105383759	0.38	3.77	0	25.2	3	14.72	-3.35426	0.00674227	ABCC4; ATP-binding cassette, subfamily C (CFTR/MRP), member 4; K05673	PREDICTED: uncharacterized protein LOC105383759 [Plutella xylostella]
LOC105382849	1.67	1.42	1.35	2.53	4.04	11.18	-2.30416	0.0168898	ABCC10; ATP-binding cassette, subfamily C (CFTR/MRP), member 10; K05674	PREDICTED: multidrug resistance-associated protein 7-like [Plutella xylostella]
LOC105388338	19.22	26.81	14.91	34.87	108.72	70.14	-2.344	0.0179804	ABCC4; ATP-binding cassette, subfamily C (CFTR/MRP), member 4; K05673	PREDICTED: multidrug resistance-associated protein 4-like [Plutella xylostella]
LOC105387104	1.74	1.7	0.62	4.88	2.66	9.04	-2.23956	0.0200477	ABCC10; ATP-binding cassette, subfamily C (CFTR/MRP), member 10; K05674	PREDICTED: multidrug resistance-associated protein 7-like [Plutella xylostella]
LOC105383248	6.56	4.31	2.02	25.45	17.43	25.99	-2.75883	0.00051483	GALNT; polypeptide N-acetylgalactosaminyltransferase [EC:2.4.1.41]; K00710	PREDICTED: N-acetylgalactosaminyltransferase 7 [Plutella xylostella]
LOC105396404	3.25	1.84	0	5.23	4.57	7.09	-2.03274	0.0439344	GALNT; polypeptide N-acetylgalactosaminyltransferase [EC:2.4.1.41]; K00710	PREDICTED: N-acetylgalactosaminyltransferase 5-like isoform X2 [Plutella xylostella]
LOC105389213	0	0.24	0	123.57	7.81	70.71	-9.27413	4.35389e-09	katE, CAT, catB, srpA; catalase [EC:1.11.1.6]; K03781	PREDICTED: catalase-like [Plutella xylostella]
LOC105387387	1.84	0.82	1.15	704.54	16.1	111.91	-7.9573	2.81793e-07	katE, CAT, catB, srpA; catalase [EC:1.11.1.6]; K03781	PREDICTED: catalase-2-like [Plutella xylostella]
LOC105384526	1.85	0	4.62	630.93	32.11	74.19	-6.89253	0.00019843	katE, CAT, catB, srpA; catalase [EC:1.11.1.6]; K03781	PREDICTED: catalase-like [Plutella xylostella]
LOC105385727	0	0	0	6.27	0	6.26	-8.76928	0.00205383	katE, CAT, catB, srpA; catalase [EC:1.11.1.6]; K03781	PREDICTED: catalase-like [Plutella xylostella]
LOC105390515	57.12	46.27	107.62	107.94	564.64	502.9	-2.77816	0.0170992	katE, CAT, catB, srpA; catalase [EC:1.11.1.6]; K03781	PREDICTED: catalase-like [Plutella xylostella]
LOC105397185	6.05	10.9	0	80.26	17.9	79.79	-3.44162	0.000537555	(GABA receptor modulator, acyl-CoA-binding protein);DBI, ACBP; diazepam-binding inhibitor; K08762	PREDICTED: acyl-CoA-binding protein homolog [Plutella xylostella]
LOC105393944	0.69	0.81	0.49	35.27	11.84	29.5	-5.5428	4.35389e-09	UGT; glucuronosyltransferase [EC:2.4.1.17]; K00699	PREDICTED: UDP-glucuronosyltransferase 2B2-like [Plutella xylostella]
LOC105382331	0.61	1.14	1.84	478.6	6.89	57.31	-7.48595	7.96807e-06	UGT; glucuronosyltransferase [EC:2.4.1.17]; K00699	PREDICTED: UDP-glucuronosyltransferase 2C1-like [Plutella xylostella]
LOC105389450	0.22	0	0	0.06	7.09	3.46	-5.95848	0.00548048	UGT; glucuronosyltransferase [EC:2.4.1.17]; K00699	PREDICTED: UDP-glucuronosyltransferase 2B18-like isoform X2 [Plutella xylostella]
LOC105390280	1.31	3.03	1.15	5.15	20.99	28.21	-3.74571	0.000204711	NA	PREDICTED: sodium-independent sulfate anion transporter-like [Plutella xylostella]
LOC105393129	3.27	3.09	1.99	13.69	15.35	19.96	-2.94027	0.000251287	NA	PREDICTED: putative sodium-dependent multivitamin transporter isoform X2 [Plutella xylostella]
LOC105392444	5.53	2.95	12.03	70.06	242.72	72.41	-4.64283	0.000264178	SLC6A5_9, GLYT; solute carrier family 6 (neurotransmitter transporter, glycine) member 5/9; K05038	PREDICTED: sodium-dependent nutrient amino acid transporter 1-like [Plutella xylostella]
LOC105392875	18.53	18.49	10.36	41.5	136.79	177.74	-3.34959	0.000532603	NA	PREDICTED: sodium-independent sulfate anion transporter-like isoform X2 [Plutella xylostella]
LOC105397827	2.25	5.76	0	58.87	5.36	23.02	-3.43473	0.00464755	NA	PREDICTED: sodium-independent sulfate anion transporter-like, partial [Plutella xylostella]
LOC105395761	2.85	2.88	0.89	42.46	1.21	6.96	-3.14496	0.0125243	NA	PREDICTED: sodium-independent sulfate anion transporter-like [Plutella xylostella]
LOC105384135	0.1	0.33	0.5	0.1	4.65	4.97	-4.11689	0.0326173	NA	PREDICTED: sodium-dependent nutrient amino acid transporter 1-like [Plutella xylostella]
LOC105383336	39.28	43	23.29	81.18	83.74	100.36	-1.7353	0.0439628	ATPeV0A, ATP6N; V-type H+-transporting ATPase subunit a; K02154	PREDICTED: V-type proton ATPase 116 kDa subunit a isoform 1-like [Plutella xylostella]
LOC105380125	2.97	8.6	0.71	26.26	4.04	10.86	-2.02058	0.0464039	ATP1B, CD298; sodium/potassium-transporting ATPase subunit beta; K01540	PREDICTED: sodium/potassium-transporting ATPase subunit beta-2-like [Plutella xylostella]
LOC105386976	0.47	1.04	0	6.2	2.37	5.77	-3.25076	0.00219908	PPEF, PPP7C; serine/threonine-protein phosphatase with EF-hands [EC:3.1.3.16]; K13807	PREDICTED: serine/threonine-protein phosphatase rdgC-like [Plutella xylostella]
LOC105398466	13.01	12.08	7.55	20.14	93.49	52.6	-2.91518	0.00458144	NA	PREDICTED: extracellular serine/threonine protein kinase FAM20C-like [Plutella xylostella]
LOC105388363	23.22	10.19	54.18	288.25	144.73	234.75	-2.99987	0.00629429	PRSS1_2_3; trypsin [EC:3.4.21.4]; K01312	PREDICTED: venom serine protease 34-like [Plutella xylostella]
LOC105385563	0.96	1.64	0	6.72	2.22	3.62	-2.42226	0.0187684	PPEF, PPP7C; serine/threonine-protein phosphatase with EF-hands [EC:3.1.3.16]; K13807	PREDICTED: serine/threonine-protein phosphatase rdgC-like, partial [Plutella xylostella]
LOC105390690	0.51	0.7	0	3.63	0.46	3.97	-2.69984	0.0297038	PLK1; polo-like kinase 1 [EC:2.7.11.21]; K06631	PREDICTED: serine/threonine-protein kinase polo-like [Plutella xylostella]
LOC105395448	22.72	8.96	36.43	17.44	184.78	183.09	-2.79521	0.0333617	PRSS1_2_3; trypsin [EC:3.4.21.4]; K01312	PREDICTED: serine protease 48-like [Plutella xylostella]
LOC105387269	2.21	2.54	0.71	4.92	2.64	8.29	-1.78837	0.0369606	NA	PREDICTED: serine/threonine-protein kinase 40-like [Plutella xylostella]
LOC105387238	9.99	7.95	2.95	18.6	14.27	17.28	-1.62591	0.0497419	PPP2R2; serine/threonine-protein phosphatase 2A regulatory subunit B; K04354	PREDICTED: protein phosphatase PP2A 55 kDa regulatory subunit, partial [Plutella xylostella]
LOC105392640	0.13	0.14	0.11	0.64	0.1	0.28	-2.01333	0.0343002	RYR2; ryanodine receptor 2; K04962	PREDICTED: ryanodine receptor 44F-like [Plutella xylostella]
