# Supplementary material for: Bacillus thuringiensis and Chlorantraniliprole Trigger the Expression of Detoxification-Related Genes in the Larval Midgut of Plutella xylostella
Source: Front Physiol. 2021 Dec 13;12:780255. doi: 10.3389/fphys.2021.780255 (PMC8710669; doi:10.3389/fphys.2021.780255)
Supplement: Supplementary file 4 [file Table_4.XLSX]

## Sheet: Sheet1
	Table S4 Key/Hub genes selected from all pairs of DBM strains of Plutella xylostella
Gene	Bt-DBM_1	Bt-DBM_2	Bt-DBM_3	FOH-DBM_1	FOH-DBM_2	FOH-DBM_3	logFC	FDR	Description
Bt-DBM vs FOH-DBM
LOC105391951	18.49	21.66	22.26	73.54	50.93	150.35	-2.40563	0.0168224	PREDICTED: UDP-glucuronosyltransferase 1-7C-like [Plutella xylostella]
LOC105383909	24.13	291.15	318.48	1.42	3.67	5.98	5.33729	4.23231e-05	PREDICTED: chitinase 2 [Plutella xylostella]
LOC105393944	2.13	5.79	9.06	35.27	11.84	29.5	-2.52126	0.00962798	PREDICTED: UDP-glucuronosyltransferase 2B2-like [Plutella xylostella]
Bt-DBM vs CL-DBM	Bt-DBM_1	Bt-DBM_2	Bt-DBM_3	CL-DBM_1	CL-DBM_2	CL-DBM_3	logFC	FDR	Description
LOC105385802	127.05	68.72	107.27	10.45	6.14	15.96	2.57831		PREDICTED: serpin B13 isoform X2 [Plutella xylostella]
LOC105383918	0	3.29	12.42	0	0	0	8.72662	0.0153795	PREDICTED: trypsin-like [Plutella xylostella]
Bt-DBM vs SS-DBM	Bt-DBM_1	Bt-DBM_2	Bt-DBM_3	SS-DBM_1	SS-DBM_2	SS-DBM_3	logFC	FDR	Description
LOC105380553	25.69	29.66	1.03	0.09	0.41	0.13	6.26661	6.83368e-06	PREDICTED: cytochrome P450 6B7-like [Plutella xylostella]
Bt-DBM vs BtC-DBM	Bt-DBM_1	Bt-DBM_2	Bt-DBM_3	BtC-DBM_1	BtC-DBM_2	BtC-DBM_3	logFC	FDR	Description
LOC105392147	5.15	1.92	2.1	0.19	0.15	0.86	2.56219	0.0227913	PREDICTED: carboxylesterase 1, Y-linked-like [Plutella xylostella]
BtC-DBM vs FOH-DBM	BtC-DBM_1	BtC-DBM_2	BtC-DBM_3	FOH-DBM_1	FOH-DBM_2	FOH-DBM_3	logFC	FDR	Description
LOC105381408	0.29	0	0	2.92	9.47	31.7	-7.63223	3.03185e-08	PREDICTED: chitinase-1-like [Plutella xylostella]
BtC-DBM vs CL-DBM	BtC-DBM_1	BtC-DBM_2	BtC-DBM_3	CL-DBM_1	CL-DBM_2	CL-DBM_3	logFC	FDR	Description
LOC105387005	14.22	14.21	8.86	60.11	59	16.46	-2.08669	0.00545189	PREDICTED: cytochrome P450 6B6-like [Plutella xylostella]
LOC105384400	14.11	9.58	8.41	0.8	0.44	0	4.13929	5.59264e-05	PREDICTED: trypsin-1-like [Plutella xylostella]
LOC105389468	3.48	2.64	6.74	0.61	0.28	0.04	3.50377	0.00823622	PREDICTED: acetylcholinesterase [Plutella xylostella]
BtC-DBM vs SS-DBM	BtC-DBM_1	BtC-DBM_2	BtC-DBM_3	SS-DBM_1	SS-DBM_2	SS-DBM_3	logFC	FDR	Description
LOC105388338	16.2	19.23	17.85	81.94	66.58	103.52	-3.00892	1.77079e-07	PREDICTED: ABCC4; multidrug resistance-associated protein 4-like [Plutella xylostella]
LOC105392138	53.68	12.9	82.87	0	0	0	10.9332	2.56123e-14	PREDICTED: glutathione S-transferase 1-like [Plutella xylostella]
FOH-DBM vs SS-DBM	FOH-DBM_1	FOH-DBM_2	FOH-DBM_3	SS-DBM_1	SS-DBM_2	SS-DBM_3	logFC	FDR	Description
LOC105392138	7.03	11.37	0	0	0	0	7.88817	0.00013633	PREDICTED: glutathione S-transferase 1-like [Plutella xylostella]
LOC105388338	19.22	26.81	14.91	81.94	66.58	103.52	-2.52163	0.00022091	PREDICTED: ABCC4,multidrug resistance-associated protein 4-like [Plutella xylostella]
CL-DBM vs FOH-DBM	CL-DBM_1	CL-DBM_2	CL-DBM_3	FOH-DBM_1	FOH-DBM_2	FOH-DBM_3	logFC	FDR	Description
LOC105382179	7.6	1.28	1.84	0.13	0.09	0.21	4.25521	0.00206346	PREDICTED: cytochrome P450 6B1-like [Plutella xylostella]
LOC105388353	0	0.96	0	173.84	4.18	22.21	-7.45502	8.64343e-06	PREDICTED: trypsin [Plutella xylostella]
